# Supplementary material for: Integrative Analysis of the microRNAome and Transcriptome Illuminates the Response of Susceptible Rice Plants to Rice Stripe Virus
Source: PubMed Central journal article supplement (PMC4723043; doi:10.1371/journal.pone.0146946), 2016-01-22
Supplement: pone.0146946.s001.pdf [file pone.0146946.s001.pdf]

**S1 Table.** The primers used for miRNA expression analysis

| miRNAs         | RT Primers                                         | Forward primers       | Universal Reverse Primer      |
|----------------|----------------------------------------------------|-----------------------|-------------------------------|
| osa-miR812j    | GTCGTATCCAGTGCAGGGTCCGAGGTATTCGCACTGGATACGACTGTCCA | CAAGCGTGAAGACGGATGA   | CAGTGCA<br>GGGTCCG<br>AGGTATT |
| osa-miR5072    | GTCGTATCCAGTGCAGGGTCCGAGGTATTCGCACTGGATACGACTGGCGA | ATATCGTGCGATTCCCCAGC  |                               |
| osa-miR444a-5p | GTCGTATCCAGTGCAGGGTCCGAGGTATTCGCACTGGATACGACTATGCA | ATAGCGTGGCTAGAGGTGGC  |                               |
| osa-miR444e    | GTCGTATCCAGTGCAGGGTCCGAGGTATTCGCACTGGATACGACAAGCTT | ATAGCGTGTGCAGTTGCTGC  |                               |
| osa-miR396c-3p | GTCGTATCCAGTGCAGGGTCCGAGGTATTCGCACTGGATACGACCTTCCC | TCAGCGTAGGTCAAGAAAGC  |                               |
| osa-miR1870-5p | GTCGTATCCAGTGCAGGGTCCGAGGTATTCGCACTGGATACGACATGCCC | CCAGCGTGTGCTGAATTAGA  |                               |
| osa-miR172d-5p | GTCGTATCCAGTGCAGGGTCCGAGGTATTCGCACTGGATACGACGTGAAT | ATATCGTGGCAGCACCATCA  |                               |
| osa-miR171c-3p | GTCGTATCCAGTGCAGGGTCCGAGGTATTCGCACTGGATACGACGATATT | ATAGTGTGATTGAGCCGTGC  |                               |
| osa-miR166d-5p | GTCGTATCCAGTGCAGGGTCCGAGGTATTCGCACTGGATACGACCCTCGA | ACAGCGTGGGAATGTTGTCT  |                               |
| osa-miR159b    | GTCGTATCCAGTGCAGGGTCCGAGGTATTCGCACTGGATACGACCAGAG  | ACAGCGTGTTTGGATTGAAG  |                               |
| osa-miR156c-3p | GTCGTATCCAGTGCAGGGTCCGAGGTATTCGCACTGGATACGACGCTGA  | ACAGCGTGGCTCACTTCTCT  |                               |
| osa-miR1432-5p | GTCGTATCCAGTGCAGGGTCCGAGGTATTCGCACTGGATACGACGTCGGT | ACAGCGTGATCAGGAGAGAT  |                               |
| osa-miR1432-3p | GTCGTATCCAGTGCAGGGTCCGAGGTATTCGCACTGGATACGACGTCGGT | CCAGCGTGCAGGTGTCATCT  |                               |
| osa-miR1429-5p | GTCGTATCCAGTGCAGGGTCCGAGGTATTCGCACTGGATACGACATGCAC | CCAGCGTGGTAATATACTAA  |                               |
| osa-miR1425-3p | GTCGTATCCAGTGCAGGGTCCGAGGTATTCGCACTGGATACGACATTAA  | CCAGCGTGCAGCAAGAAGCTG |                               |
| osa-miR1423-5p | GTCGTATCCAGTGCAGGGTCCGAGGTATTCGCACTGGATACGACCGAGCG | ATAGCGTGAGGCAACTACAC  |                               |
| osa-miR1320-5p | GTCGTATCCAGTGCAGGGTCCGAGGTATTCGCACTGGATACGACCTATA  | CCAGCGTGTGGAACGGAGGA  |                               |
| osa-miR1863b.2 | GTCGTATCCAGTGCAGGGTCCGAGGTATTCGCACTGGATACGACAGTAA  | CAAGCGTGAGAGACTTGGCT  |                               |
| osa-miR167a-5p | GTCGTATCCAGTGCAGGGTCCGAGGTATTCGCACTGGATACGACTAGAT  | ATAGCGTGTGAAGCTGCCAG  |                               |
| osa-miR156a    | GTCGTATCCAGTGCAGGGTCCGAGGTATTCGCACTGGATACGACGTGCT  | TCAGCGTGTGACAGAAGAGA  |                               |
