# Supplementary material for: Integrative Analysis of the microRNAome and Transcriptome Illuminates the Response of Susceptible Rice Plants to Rice Stripe Virus
Source: PubMed Central journal article supplement (PMC4723043; doi:10.1371/journal.pone.0146946), 2016-01-22
Supplement: pone.0146946.s002.pdf [file pone.0146946.s002.pdf]

**S2 Table.** The primers used to test the target genes

| <b>Gene ID</b> | <b>F primer (5'-3')</b> | <b>R primer (5'-3')</b> |
|----------------|-------------------------|-------------------------|
| LOC_Os09g19280 | TGCGAATACCTCGGACCCT     | GGCTTCATCCCAACCGTTAC    |
| LOC_Os02g40190 | CGATTCCTATCAGTATGCCC    | TGACACCTTTCCACCAACAG    |
| LOC_Os08g34740 | GTTACTCGTTCGCATCTGGT    | CTTCGTGGATAGCACTTGGT    |
| LOC_Os02g33180 | CAAGGTTTCTTTTGCTCTGA    | TTCCACCCTCTAATCCTGTC    |
| LOC_Os03g18850 | AGCCGCTACAATGTTTCACT    | GTACTIONTCTCGTCCACCC    |
| LOC_Os06g48590 | AATCAGCTCAAGCTCATAGT    | ATGCCAGGAGTGTATGGAAG    |
| LOC_Os03g55164 | CTGCTCGACGACGGCTACCG    | CTCTTTCATCTGGTGAGCGC    |
| LOC_Os03g49640 | GCTGATATTTGGAGTCTTGG    | TCGAAGCGGTCTATTAACAA    |
| LOC_Os01g42400 | GTCTGCCTCGAGGCCGACGG    | ACGACAGTGATGTTCGGCTGT   |
| LOC_Os06g05520 | CCATATCCTCCTCGTGAAAG    | TTGCTTGTATTGAAGGTGGC    |
| LOC_Os01g60490 | TACATGGCTTCCTCCATGCA    | GGAGACGATCACATCCTTCT    |
| LOC_Os02g05480 | TCAGCTCAAGCTCATTGTCA    | GGGCACACCGGGAGTGTAGG    |
| LOC_Os09g29840 | GACAAGGAGGACTACAAAAA    | GGAAGAGTAAAACCGCAACA    |
| LOC_Os11g40970 | GACTAATTCTTGAGTATAG     | GTCTCCAGCTACTCTTACCC    |
| LOC_Os02g40200 | GCTCTTTCTTGCACCTCGTCT   | GCAAAGCGTACTTTTCTCGCT   |
| LOC_Os01g71340 | TCGCCGAGCGACGTCGTGCA    | GTCCATGGTGAGGGCGATGC    |
| LOC_Os07g35680 | GATCCGGCGATGCGCGGCCG    | GAGCATCACGCTCACCGCCG    |
| LOC_Os02g57280 | ACCAAGATCGGAGGAGGGAG    | CCACTCACCGGAGATGATGG    |
| LOC_Os01g53020 | ATGTTTCATCAATGAAGTTTA   | CCTAGGGGCACTGTCATCGA    |
| LOC_Os04g21820 | TCAGCTAACATACTTTTAGA    | GTAGCCAAAGGTGCCTTGTA    |
| LOC_Os02g57280 | GTGCTGGTAGCCACTGCCGA    | GTCACTCTTGACGATCACTC    |
| LOC_Os10g04570 | CCACTTCGTCTTATGCCTCC    | TAACCTCAAAGTCCTCCTTTG   |
