# Supplementary material for: Integrative Analysis of the microRNAome and Transcriptome Illuminates the Response of Susceptible Rice Plants to Rice Stripe Virus
Source: PubMed Central journal article supplement (PMC4723043; doi:10.1371/journal.pone.0146946), 2016-01-22
Supplement: pone.0146946.s003.pdf [file pone.0146946.s003.pdf]

**S3 Table.** The miRNAs significantly induced by RSV infection (p<0.05, Fold change≥2, reads more than 100)

| miRNA           | Sequence                 | Average reads    |                 | p-value | Fold change(RI/CK) |
|-----------------|--------------------------|------------------|-----------------|---------|--------------------|
|                 |                          | RI               | CK              |         |                    |
| osa-miR812j     | AAGACGGAUGAUUAAAGUUGGACA | 1585.23 ± 126.95 | 584.88 ± 332.10 | 0.016   | 2.710              |
| osa-miR812i     | AAGACGGAUGAUUAAAGUUGGACA | 1505.06 ± 136.95 | 573.68 ± 334.23 | 0.022   | 2.624              |
| osa-miR812h     | AAGACGGAUGAUUAAAGUUGGACA | 1505.06 ± 136.95 | 573.68 ± 334.23 | 0.022   | 2.624              |
| osa-miR812e     | GACGGACGGUAAACGUUGGAC    | 769.10 ± 222.95  | 190.83 ± 77.56  | 0.026   | 4.030              |
| osa-miR812d     | GACGGACGGUAAACGUUGGAC    | 592.81 ± 59.59   | 73.13 ± 56.58   | 0.001   | 8.107              |
| osa-miR812c     | GACGGACGGUAAACGUUGGAC    | 844.10 ± 169.39  | 190.83 ± 77.56  | 0.008   | 4.423              |
| osa-miR812b     | GACGGACGGUAAACGUUGGAC    | 487.77 ± 81.77   | 81.05 ± 57.97   | 0.005   | 6.018              |
| osa-miR812a     | GACGGACGGUAAACGUUGGAC    | 850.29 ± 167.22  | 190.83 ± 77.56  | 0.007   | 4.456              |
| osa-miR5077     | GUUCGCGUCGGGUUCACCA      | 889.85 ± 207.10  | 224.99 ± 40.88  | 0.011   | 3.955              |
| osa-miR5072     | CGAUUCCCCAGCGGAGUCGCCA   | 249.94 ± 32.87   | 45.19 ± 27.06   | 0.002   | 5.530              |
| osa-miR444f     | UGCAGUUGUUGCCUCAAGCUU    | 1455.90 ± 227.86 | 698.67 ± 188.19 | 0.022   | 2.084              |
| osa-miR444e     | UGCAGUUGCUGCCUCAAGCUU    | 640.67 ± 29.80   | 106.97 ± 10.78  | 0.000   | 5.989              |
| osa-miR444d.2   | UGCAGUUGCUGCCUCAAGCUU    | 630.82 ± 29.69   | 105.44 ± 11.70  | 0.000   | 5.983              |
| osa-miR444c.2   | UGCAGUUGUUGUCUCAAGCUU    | 1345.83 ± 177.66 | 660.34 ± 193.45 | 0.021   | 2.038              |
| osa-miR444a-5p  | GCUAGAGGUGGCAACUGCAUA    | 1398.91 ± 351.64 | 439.60 ± 81.51  | 0.020   | 3.182              |
| osa-miR444a.2   | UGCAGUUGCUGCCUCAAGCUU    | 643.58 ± 30.97   | 108.30 ± 12.08  | 0.000   | 5.943              |
| osa-miR396c-3p  | GGUCAAGAAAGCUGUGGGAAG    | 193.94 ± 29.42   | 27.27 ± 4.53    | 0.001   | 7.112              |
| osa-miR393b     | UCCAAAGGGAUCGCAUUGAUCU   | 134.34 ± 13.42   | 54.35 ± 6.66    | 0.002   | 2.472              |
| osa-miR393      | UCCAAAGGGAUCGCAUUGAUC    | 124.93 ± 16.38   | 50.35 ± 6.57    | 0.004   | 2.481              |
| osa-miR2871a-5p | GACCGUAGAAACUAGCAUAGAAAA | 1242.10 ± 430.65 | 37.83 ± 12.95   | 0.017   | 32.833             |
| osa-miR1883a    | ACCUGUGACGGGCCGAGAAUGGAA | 258.90 ± 92.82   | 60.52 ± 11.71   | 0.040   | 4.278              |
| osa-miR1870-5p  | UGCUGAAUUAGACCUAGUGGGCAU | 2165.33 ± 279.45 | 156.41 ± 19.10  | 0.001   | 13.844             |
| osa-miR1863b.2  | AGAGACUUGGCUGAUGCAUUACU  | 159.81 ± 41.39   | 403.72 ± 32.84  | 0.003   | 0.396              |

|                |                        |                    |                   |       |         |
|----------------|------------------------|--------------------|-------------------|-------|---------|
| osa-miR1861j   | CGGUCUUGAGGCAGGAACUGAG | 169.62 ± 44.11     | 11.44 ± 2.61      | 0.007 | 14.829  |
| osa-miR1861h   | CGGUCUUGAGGCAGGAACUGAG | 169.62 ± 44.11     | 11.44 ± 2.61      | 0.007 | 14.829  |
| osa-miR172d-5p | GCAGCACCAUCAAGAUUCAC   | 667.58 ± 22.38     | 59.76 ± 18.29     | 0.000 | 11.171  |
| osa-miR172d-3p | AGAAUCUUGAUGAUGCUGCAU  | 15880.86 ± 2505.18 | 5314.54 ± 2426.61 | 0.013 | 2.988   |
| osa-miR172c    | UGAAUCUUGAUGAUGCUGCAC  | 548.03 ± 131.03    | 69.31 ± 58.14     | 0.009 | 7.907   |
| osa-miR171c-3p | UGAUUGAGCCGUGCCAAUAUC  | 242.23 ± 6.77      | 28.37 ± 17.26     | 0.000 | 8.539   |
| osa-miR167i-5p | UGAAGCUGCCAGCAUGAUCUG  | 333.64 ± 53.00     | 933.74 ± 195.36   | 0.014 | 0.357   |
| osa-miR167i-3p | AGAUCAUGUUGCAGCUUCACU  | 437.48 ± 41.59     | 63.99 ± 15.09     | 0.000 | 6.837   |
| osa-miR167h-3p | AGGUCAUGCUGUAGUUUCAUC  | 1747.73 ± 128.09   | 15.80 ± 7.34      | 0.000 | 110.619 |
| osa-miR167e-5p | UGAAGCUGCCAGCAUGAUCUG  | 447.77 ± 75.95     | 962.22 ± 197.36   | 0.026 | 0.465   |
| osa-miR167e-3p | AGAUCAUGUUGCAGCUUCACU  | 437.48 ± 41.59     | 63.99 ± 15.09     | 0.000 | 6.837   |
| osa-miR167c-5p | UGAAGCUGCCAGCAUGAUCUA  | 597.39 ± 242.72    | 3659.87 ± 937.65  | 0.011 | 0.163   |
| osa-miR167a-5p | UGAAGCUGCCAGCAUGAUCUA  | 597.39 ± 242.72    | 3659.87 ± 937.65  | 0.011 | 0.163   |
| osa-miR167a-3p | AUCAUGCAUGACAGCCUCAUUU | 97.33 ± 31.56      | 11.38 ± 6.51      | 0.020 | 8.553   |
| osa-miR166d-5p | GGAAUGUUGUCUGGCUCGAGG  | 1664.15 ± 212.45   | 44.99 ± 13.18     | 0.000 | 36.989  |
| osa-miR166b-5p | GGAAUGUUGUCUGGCUCGGGG  | 165.07 ± 6.55      | 5.31 ± 2.16       | 0.000 | 31.089  |
| osa-miR164f    | UGGAGAAGCAGGGCACGUGCA  | 9567.50 ± 654.79   | 4724.00 ± 86.88   | 0.000 | 2.025   |
| osa-miR164b    | UGGAGAAGCAGGGCACGUGCA  | 10898.81 ± 1662.59 | 5057.07 ± 554.40  | 0.009 | 2.155   |
| osa-miR164a    | UGGAGAAGCAGGGCACGUGCA  | 10900.50 ± 1662.18 | 5057.86 ± 555.52  | 0.009 | 2.155   |
| osa-miR160d-3p | GCGUGCGAGGAGCCAAGCAUG  | 144.64 ± 10.06     | 0.00 ± 0.00       | 0.000 | NA      |
| osa-miR160c-3p | GCGUGCACGGAGCCAAGCAUA  | 120.97 ± 8.87      | 0.00 ± 0.00       | 0.000 | NA      |
| osa-miR160b-3p | GCGUGCAAGGAGCCAAGCAUG  | 141.85 ± 24.04     | 14.09 ± 7.79      | 0.002 | 10.066  |
| osa-miR160a-3p | GCGUGCAAGGAGCCAAGCAUG  | 141.85 ± 24.04     | 14.09 ± 7.79      | 0.002 | 10.066  |
| osa-miR159e    | AUUGGAUUGAAGGGAGCUCCU  | 332.15 ± 83.15     | 73.18 ± 6.65      | 0.012 | 4.539   |
| osa-miR159d    | AUUGGAUUGAAGGGAGCUCCG  | 379.25 ± 145.58    | 74.51 ± 3.91      | 0.042 | 5.090   |
| osa-miR159b    | UUUGGAUUGAAGGGAGCUCUG  | 8706.52 ± 416.03   | 2943.48 ± 387.62  | 0.000 | 2.958   |
| osa-miR159a.2  | UUGCAUGCCCCAGGAGCUGCA  | 6519.31 ± 286.06   | 783.41 ± 94.21    | 0.000 | 8.322   |

|                |                          |                    |                      |       |        |
|----------------|--------------------------|--------------------|----------------------|-------|--------|
| osa-miR159a.1  | UUUGGAUUGAAGGGAGCUCUG    | 8373.18 ± 682.39   | 2276.82 ± 757.04     | 0.001 | 3.678  |
| osa-miR156k    | UGACAGAAGAGAGAGAGCACA    | 11457.92 ± 775.60  | 176994.42 ± 12030.08 | 0.000 | 0.065  |
| osa-miR156j-5p | UGACAGAAGAGAGUGAGCAC     | 2922.48 ± 335.43   | 28265.84 ± 4356.10   | 0.001 | 0.103  |
| osa-miR156j-3p | GCUCGCUCCUCUUUCUGUCAGC   | 115.68 ± 4.78      | 6.04 ± 1.41          | 0.000 | 19.154 |
| osa-miR156i    | UGACAGAAGAGAGUGAGCAC     | 19179.03 ± 4823.24 | 208953.80 ± 6546.05  | 0.000 | 0.092  |
| osa-miR156h-5p | UGACAGAAGAGAGUGAGCAC     | 2921.84 ± 334.58   | 28266.54 ± 4356.14   | 0.001 | 0.103  |
| osa-miR156g-3p | GCUCACUUCUCUCUCUGUCAGC   | 153.24 ± 45.70     | 0.00 ± 0.00          | 0.009 | NA     |
| osa-miR156f-5p | UGACAGAAGAGAGUGAGCAC     | 2921.84 ± 334.58   | 28266.54 ± 4356.14   | 0.001 | 0.103  |
| osa-miR156e    | UGACAGAAGAGAGUGAGCAC     | 19179.03 ± 4823.24 | 208953.80 ± 6546.05  | 0.000 | 0.092  |
| osa-miR156d    | UGACAGAAGAGAGUGAGCAC     | 24960.15 ± 4648.45 | 230533.14 ± 30811.82 | 0.001 | 0.108  |
| osa-miR156c-3p | GCUCACUUCUCUCUCUGUCAGC   | 153.24 ± 45.70     | 0.00 ± 0.00          | 0.009 | NA     |
| osa-miR156a    | UGACAGAAGAGAGUGAGCAC     | 19512.37 ± 4757.86 | 208956.99 ± 6548.31  | 0.000 | 0.093  |
| osa-miR1432-5p | AUCAGGAGAGAUGACACCGAC    | 9330.33 ± 152.16   | 341.50 ± 271.41      | 0.000 | 27.321 |
| osa-miR1432-3p | CAGGUGUCAUCUCCCCUGAAC    | 236.19 ± 34.58     | 0.00 ± 0.00          | 0.001 | NA     |
| osa-miR1429-5p | GUAAUAUACUAAUCCGUGCAU    | 214.67 ± 30.13     | 58.09 ± 24.61        | 0.005 | 3.695  |
| osa-miR1425-3p | CAGCAAGAACUGGAUCUUAUU    | 15480.54 ± 2450.08 | 677.46 ± 138.32      | 0.001 | 22.851 |
| osa-miR1423-5p | AGGCAACUACACGUUGGGCGCUCG | 266.94 ± 23.28     | 59.65 ± 14.68        | 0.000 | 4.475  |
| osa-miR1320-5p | UGGAACGGAGGAAUUUUUAUAG   | 4257.84 ± 596.40   | 263.52 ± 70.43       | 0.001 | 16.158 |
| osa-miR1320-3p | UGUAAAAUUCAUUCGUUCCAA    | 374.13 ± 45.95     | 41.98 ± 10.23        | 0.001 | 8.911  |
