# Supplementary material for: Integrative Analysis of the microRNAome and Transcriptome Illuminates the Response of Susceptible Rice Plants to Rice Stripe Virus
Source: PubMed Central journal article supplement (PMC4723043; doi:10.1371/journal.pone.0146946), 2016-01-22
Supplement: pone.0146946.s004.pdf [file pone.0146946.s004.pdf]

**S4 Table.** The miRNAs selected for qPCR assays

| miRNAs         | miRNA sequences (5'-3')  | RI        |           | CK        |           | p-value | Fold change |
|----------------|--------------------------|-----------|-----------|-----------|-----------|---------|-------------|
|                |                          | CT values | Std. Dev. | CT values | Std. Dev. |         |             |
| osa-miR812j    | AAGACGGAUGAUUAAAGUUGGACA | 24.3      | 0.0286    | 25.16     | 0.0452    | 0.008   | 1.53        |
| osa-miR5072    | CGAUUCCCCAGCGGAGUCGCCA   | 21.5      | 0.0353    | 24.24     | 0.0140    | 0.001   | 5.72        |
| osa-miR444e    | UGCAGUUGCUGCCUCAAGCUU    | 22.1      | 0.0690    | 23.57     | 0.0558    | 0.009   | 2.37        |
| osa-miR444a-5p | GCUAGAGGUGGCAACUGCAUA    | 19.7      | 0.0366    | 21.15     | 0.0513    | 0.006   | 2.38        |
| osa-miR396c-3p | GGUCAAGAAAGCUGUGGGAAG    | 18.2      | 0.0799    | 21.21     | 0.1489    | 0.000   | 6.90        |
| osa-miR1870-5p | UGCUGAAUUAGACCUAGUGGGCAU | 20.7      | 0.0633    | 22.06     | 0.0629    | 0.039   | 2.11        |
| osa-miR1863b.2 | AGAGACUUGGCUGAUGCAUUACU  | 22.4      | 0.0633    | 20.50     | 0.0391    | 0.002   | 0.33        |
| osa-miR172d-5p | GCAGCACCAUCAAGAUUCAC     | 27.0      | 0.0683    | 29.25     | 0.0391    | 0.002   | 4.00        |
| osa-miR171c-3p | UGAUUGAGCCGUGCCAAUAUC    | 18.3      | 0.0866    | 21.77     | 0.0093    | 0.002   | 1.58        |
| osa-miR167a-5p | UGAAGCUGCCAGCAUGAUCUA    | 21.7      | 0.0690    | 19.20     | 0.0513    | 0.004   | 0.53        |
| osa-miR166d-5p | GGA AUGUUGUCUGGCUCGAGG   | 19.62     | 0.0267    | 25.84     | 0.0799    | 0.000   | 62.71       |
| osa-miR159b    | UUUGGAUUGAAGGGAGCUCUG    | 19.02     | 0.0160    | 22.47     | 0.0506    | 0.001   | 9.25        |
| osa-miR156c-3p | GCUCACUUCUCUCUCUGUCAGC   | 18.80     | 0.1000    | 19.46     | 0.0792    | 0.007   | 1.58        |
| osa-miR156a    | UGACAGAAGAGAGUGAGCAC     | 25.6      | 0.0353    | 23.50     | 0.1489    | 0.001   | 0.68        |
| osa-miR1432-5p | AUCAGGAGAGAUGACACCGAC    | 21.8      | 0.0516    | 22.87     | 0.0515    | 0.000   | 1.83        |
| osa-miR1432-3p | CAGGUGUCAUCUCCCCUGAAC    | 20.2      | 0.0738    | 22.35     | 0.0866    | 0.002   | 3.73        |
| osa-miR1429-5p | GUA AUUAUCUAAUCCGUGCAU   | 24.3      | 0.0633    | 26.78     | 0.2552    | 0.001   | 4.75        |
| osa-miR1425-3p | CAGCAAGAACUGGAUCUUAU     | 18.6      | 0.0429    | 24.60     | 0.0125    | 0.000   | 53.84       |
| osa-miR1423-5p | AGGCAACUACACGUUGGGCGCUCG | 22.5      | 0.0633    | 23.53     | 0.0229    | 0.014   | 1.73        |
| osa-miR1320-5p | UGGAACGGAGGAAUUUUAUAG    | 17.5      | 0.0161    | 20.49     | 0.0267    | 0.003   | 6.63        |
