# Supplementary material for: Integrative Analysis of the microRNAome and Transcriptome Illuminates the Response of Susceptible Rice Plants to Rice Stripe Virus
Source: PubMed Central journal article supplement (PMC4723043; doi:10.1371/journal.pone.0146946), 2016-01-22
Supplement: pone.0146946.s005.pdf [file pone.0146946.s005.pdf]

**S5 Table.** The different expression level of genes after RSV infection (Fold change $\geq$ 2 and P<0.05)

| Gene ID        | Average reads     |                   | p-value | Fold change (RI/CK) |
|----------------|-------------------|-------------------|---------|---------------------|
|                | RI FPKM values    | CK FPKM values    |         |                     |
| LOC_Os01g01620 | 36.672 ± 2.349    | 17.529 ± 2.115    | 0.001   | 2.09                |
| LOC_Os01g01660 | 580.402 ± 76.756  | 19.153 ± 2.992    | 0.009   | 30.30               |
| LOC_Os01g01700 | 12.921 ± 0.630    | 27.451 ± 1.848    | 0.004   | 0.47                |
| LOC_Os01g01760 | 2.146 ± 0.501     | 23.391 ± 4.283    | 0.019   | 0.09                |
| LOC_Os01g01870 | 17.515 ± 0.543    | 7.972 ± 0.482     | 0.000   | 2.20                |
| LOC_Os01g02390 | 9.825 ± 0.492     | 20.236 ± 1.493    | 0.006   | 0.49                |
| LOC_Os01g02400 | 8.024 ± 1.021     | 22.551 ± 0.689    | 0.000   | 0.36                |
| LOC_Os01g02570 | 4.351 ± 1.033     | 15.875 ± 1.663    | 0.002   | 0.27                |
| LOC_Os01g02600 | 4.826 ± 0.996     | 12.294 ± 0.537    | 0.002   | 0.39                |
| LOC_Os01g02700 | 9.195 ± 2.173     | 20.646 ± 2.436    | 0.008   | 0.45                |
| LOC_Os01g02710 | 23.453 ± 3.638    | 60.131 ± 11.642   | 0.037   | 0.39                |
| LOC_Os01g02780 | 2.309 ± 0.514     | 21.014 ± 2.193    | 0.005   | 0.11                |
| LOC_Os01g02830 | 5.046 ± 0.285     | 10.599 ± 1.042    | 0.012   | 0.48                |
| LOC_Os01g02900 | 6.982 ± 0.468     | 23.214 ± 2.916    | 0.014   | 0.30                |
| LOC_Os01g03040 | 11.389 ± 0.450    | 24.914 ± 3.738    | 0.035   | 0.46                |
| LOC_Os01g03320 | 267.491 ± 6.103   | 32.925 ± 1.987    | 0.000   | 8.12                |
| LOC_Os01g03340 | 10.318 ± 0.924    | 3.053 ± 1.815     | 0.015   | 3.38                |
| LOC_Os01g03680 | 18.918 ± 1.411    | 3.434 ± 0.532     | 0.002   | 5.51                |
| LOC_Os01g03760 | 7.778 ± 0.660     | 17.625 ± 0.184    | 0.001   | 0.44                |
| LOC_Os01g04010 | 116.999 ± 22.796  | 315.121 ± 46.159  | 0.013   | 0.37                |
| LOC_Os01g04050 | 55.331 ± 6.709    | 8.588 ± 1.702     | 0.007   | 6.44                |
| LOC_Os01g04330 | 77.716 ± 10.558   | 14.563 ± 1.562    | 0.012   | 5.34                |
| LOC_Os01g04380 | 29.717 ± 8.493    | 3.602 ± 0.487     | 0.049   | 8.25                |
| LOC_Os01g05064 | 13.477 ± 0.792    | 6.344 ± 0.321     | 0.002   | 2.12                |
| LOC_Os01g05540 | 3.043 ± 0.318     | 13.411 ± 0.542    | 0.000   | 0.23                |
| LOC_Os01g05630 | 9.780 ± 1.837     | 26.131 ± 3.263    | 0.007   | 0.37                |
| LOC_Os01g06750 | 3.733 ± 0.584     | 26.096 ± 5.719    | 0.030   | 0.14                |
| LOC_Os01g06876 | 0.554 ± 0.315     | 11.407 ± 2.004    | 0.015   | 0.05                |
| LOC_Os01g07090 | 9.921 ± 0.576     | 21.790 ± 1.437    | 0.003   | 0.46                |
| LOC_Os01g07370 | 16.048 ± 1.013    | 6.897 ± 0.190     | 0.005   | 2.33                |
| LOC_Os01g07590 | 6.970 ± 0.282     | 15.182 ± 1.564    | 0.015   | 0.46                |
| LOC_Os01g08860 | 1387.597 ± 65.497 | 646.775 ± 51.838  | 0.000   | 2.15                |
| LOC_Os01g09190 | 34.640 ± 2.269    | 111.347 ± 15.281  | 0.018   | 0.31                |
| LOC_Os01g09220 | 354.509 ± 30.455  | 4.252 ± 1.127     | 0.004   | 83.37               |
| LOC_Os01g09620 | 13.780 ± 2.287    | 4.041 ± 0.620     | 0.020   | 3.41                |
| LOC_Os01g09770 | 22.680 ± 0.407    | 4.624 ± 0.400     | 0.000   | 4.90                |
| LOC_Os01g09800 | 5.365 ± 0.701     | 11.612 ± 0.830    | 0.001   | 0.46                |
| LOC_Os01g09870 | 11.050 ± 1.462    | 2.133 ± 1.180     | 0.003   | 5.18                |
| LOC_Os01g10400 | 1815.489 ± 58.413 | 3784.225 ± 26.332 | 0.000   | 0.48                |
| LOC_Os01g11160 | 23.746 ± 2.232    | 69.002 ± 1.660    | 0.000   | 0.34                |
| LOC_Os01g11590 | 5.638 ± 0.260     | 14.640 ± 2.178    | 0.027   | 0.39                |

|                |                  |                  |       |        |
|----------------|------------------|------------------|-------|--------|
| LOC_Os01g12400 | 8.204 ± 0.269    | 16.846 ± 0.109   | 0.000 | 0.49   |
| LOC_Os01g12920 | 20.987 ± 0.890   | 47.382 ± 7.144   | 0.033 | 0.44   |
| LOC_Os01g13570 | 31.975 ± 2.866   | 79.278 ± 11.061  | 0.021 | 0.40   |
| LOC_Os01g13690 | 74.515 ± 4.885   | 12.059 ± 1.901   | 0.001 | 6.18   |
| LOC_Os01g14410 | 15.252 ± 1.368   | 30.542 ± 3.650   | 0.018 | 0.50   |
| LOC_Os01g15270 | 594.805 ± 71.605 | 263.700 ± 13.532 | 0.020 | 2.26   |
| LOC_Os01g16430 | 27.395 ± 1.470   | 11.163 ± 1.606   | 0.000 | 2.45   |
| LOC_Os01g16620 | 23.468 ± 1.497   | 47.274 ± 0.096   | 0.002 | 0.50   |
| LOC_Os01g17050 | 19.962 ± 4.099   | 2.310 ± 0.354    | 0.025 | 8.64   |
| LOC_Os01g17150 | 79.546 ± 2.895   | 168.098 ± 9.861  | 0.004 | 0.47   |
| LOC_Os01g18320 | 7.361 ± 0.354    | 16.017 ± 0.562   | 0.000 | 0.46   |
| LOC_Os01g19020 | 11.172 ± 0.954   | 0.646 ± 0.241    | 0.003 | 17.30  |
| LOC_Os01g20890 | 4.971 ± 0.213    | 10.148 ± 0.588   | 0.003 | 0.49   |
| LOC_Os01g20910 | 25.512 ± 6.506   | 66.374 ± 5.383   | 0.003 | 0.38   |
| LOC_Os01g25540 | 26.763 ± 4.564   | 6.443 ± 1.390    | 0.017 | 4.15   |
| LOC_Os01g26240 | 4.354 ± 0.183    | 13.371 ± 1.429   | 0.011 | 0.33   |
| LOC_Os01g28790 | 73.799 ± 5.253   | 24.087 ± 4.285   | 0.001 | 3.06   |
| LOC_Os01g32670 | 18.489 ± 1.483   | 2.610 ± 1.445    | 0.000 | 7.08   |
| LOC_Os01g34790 | 42.717 ± 8.108   | 116.381 ± 11.049 | 0.002 | 0.37   |
| LOC_Os01g35330 | 12.858 ± 0.627   | 133.339 ± 21.177 | 0.015 | 0.10   |
| LOC_Os01g36294 | 1.853 ± 0.234    | 11.081 ± 2.101   | 0.024 | 0.17   |
| LOC_Os01g36850 | 0.029 ± 0.042    | 10.970 ± 0.385   | 0.001 | 0.00   |
| LOC_Os01g36890 | 5.393 ± 0.142    | 12.202 ± 1.025   | 0.010 | 0.44   |
| LOC_Os01g36920 | 7.015 ± 0.664    | 14.627 ± 0.316   | 0.001 | 0.48   |
| LOC_Os01g37040 | 14.251 ± 1.646   | 5.121 ± 1.022    | 0.005 | 2.78   |
| LOC_Os01g37130 | 19.720 ± 1.037   | 42.284 ± 1.637   | 0.000 | 0.47   |
| LOC_Os01g37630 | 6.240 ± 0.462    | 16.742 ± 1.211   | 0.003 | 0.37   |
| LOC_Os01g37750 | 34.865 ± 4.840   | 16.122 ± 2.542   | 0.016 | 2.16   |
| LOC_Os01g37820 | 6.128 ± 1.262    | 14.304 ± 3.061   | 0.048 | 0.43   |
| LOC_Os01g37920 | 77.277 ± 2.051   | 18.903 ± 2.015   | 0.000 | 4.09   |
| LOC_Os01g37950 | 276.057 ± 15.747 | 104.175 ± 17.736 | 0.001 | 2.65   |
| LOC_Os01g38980 | 42.740 ± 3.493   | 15.045 ± 1.967   | 0.002 | 2.84   |
| LOC_Os01g40070 | 67.951 ± 9.148   | 12.037 ± 0.338   | 0.013 | 5.65   |
| LOC_Os01g41420 | 30.007 ± 0.173   | 0.293 ± 0.210    | 0.000 | 102.47 |
| LOC_Os01g42790 | 4.101 ± 0.496    | 36.114 ± 3.010   | 0.004 | 0.11   |
| LOC_Os01g43070 | 5.045 ± 0.241    | 11.851 ± 2.014   | 0.039 | 0.43   |
| LOC_Os01g43120 | 20.776 ± 0.417   | 44.064 ± 4.759   | 0.020 | 0.47   |
| LOC_Os01g43270 | 14.488 ± 1.902   | 38.756 ± 2.513   | 0.001 | 0.37   |
| LOC_Os01g43430 | 10.410 ± 1.081   | 4.763 ± 0.475    | 0.009 | 2.19   |
| LOC_Os01g43750 | 51.920 ± 2.036   | 19.846 ± 0.689   | 0.001 | 2.62   |
| LOC_Os01g43844 | 5.231 ± 0.347    | 13.616 ± 0.888   | 0.002 | 0.38   |
| LOC_Os01g43851 | 2.383 ± 0.069    | 10.004 ± 0.722   | 0.004 | 0.24   |
| LOC_Os01g44120 | 17.747 ± 2.239   | 5.479 ± 0.451    | 0.014 | 3.24   |
| LOC_Os01g44390 | 7.561 ± 0.959    | 23.315 ± 4.394   | 0.032 | 0.32   |
| LOC_Os01g44980 | 6.408 ± 0.286    | 13.518 ± 1.870   | 0.030 | 0.47   |

|                |                  |                  |       |       |
|----------------|------------------|------------------|-------|-------|
| LOC_Os01g45530 | 5.694 ± 0.427    | 12.282 ± 1.028   | 0.005 | 0.46  |
| LOC_Os01g45914 | 14.493 ± 1.521   | 5.572 ± 0.157    | 0.014 | 2.60  |
| LOC_Os01g46980 | 11.412 ± 1.101   | 25.450 ± 0.673   | 0.000 | 0.45  |
| LOC_Os01g47330 | 306.917 ± 31.154 | 681.780 ± 6.963  | 0.002 | 0.45  |
| LOC_Os01g47370 | 2.937 ± 1.109    | 10.308 ± 0.404   | 0.006 | 0.28  |
| LOC_Os01g47450 | 5.364 ± 0.107    | 15.307 ± 1.768   | 0.015 | 0.35  |
| LOC_Os01g47730 | 48.560 ± 6.696   | 19.882 ± 1.950   | 0.020 | 2.44  |
| LOC_Os01g47760 | 67.858 ± 4.205   | 20.934 ± 2.970   | 0.000 | 3.24  |
| LOC_Os01g48200 | 10.283 ± 1.850   | 21.154 ± 0.651   | 0.008 | 0.49  |
| LOC_Os01g48446 | 17.712 ± 1.693   | 4.216 ± 0.573    | 0.004 | 4.20  |
| LOC_Os01g48610 | 6.718 ± 0.564    | 28.479 ± 1.245   | 0.000 | 0.24  |
| LOC_Os01g48620 | 13.312 ± 0.746   | 48.094 ± 4.426   | 0.007 | 0.28  |
| LOC_Os01g48640 | 26.041 ± 2.086   | 78.022 ± 5.501   | 0.002 | 0.33  |
| LOC_Os01g48770 | 13.114 ± 0.182   | 29.200 ± 3.817   | 0.027 | 0.45  |
| LOC_Os01g48950 | 17.030 ± 1.972   | 53.199 ± 3.829   | 0.001 | 0.32  |
| LOC_Os01g49210 | 20.831 ± 1.780   | 7.503 ± 1.518    | 0.001 | 2.78  |
| LOC_Os01g49750 | 0.346 ± 0.183    | 31.337 ± 3.417   | 0.006 | 0.01  |
| LOC_Os01g49830 | 6.585 ± 0.455    | 16.588 ± 1.448   | 0.006 | 0.40  |
| LOC_Os01g50030 | 12.758 ± 0.795   | 36.066 ± 3.872   | 0.011 | 0.35  |
| LOC_Os01g50032 | 10.636 ± 0.795   | 28.403 ± 5.675   | 0.045 | 0.37  |
| LOC_Os01g50410 | 15.219 ± 3.617   | 1.072 ± 0.332    | 0.030 | 14.19 |
| LOC_Os01g50420 | 16.433 ± 2.839   | 0.239 ± 0.036    | 0.015 | 68.73 |
| LOC_Os01g50770 | 9.283 ± 0.875    | 21.609 ± 0.634   | 0.000 | 0.43  |
| LOC_Os01g50849 | 6.357 ± 0.367    | 14.511 ± 0.566   | 0.000 | 0.44  |
| LOC_Os01g50930 | 7.826 ± 0.496    | 16.667 ± 1.024   | 0.002 | 0.47  |
| LOC_Os01g51390 | 10.449 ± 1.304   | 21.723 ± 1.343   | 0.001 | 0.48  |
| LOC_Os01g51410 | 51.786 ± 0.684   | 120.567 ± 12.601 | 0.016 | 0.43  |
| LOC_Os01g51570 | 27.245 ± 4.581   | 74.977 ± 4.124   | 0.000 | 0.36  |
| LOC_Os01g52010 | 8.436 ± 1.810    | 29.047 ± 2.067   | 0.000 | 0.29  |
| LOC_Os01g52500 | 37.951 ± 1.701   | 90.599 ± 7.017   | 0.006 | 0.42  |
| LOC_Os01g53020 | 50.289 ± 1.284   | 129.284 ± 7.299  | 0.003 | 0.39  |
| LOC_Os01g53150 | 10.648 ± 0.087   | 22.204 ± 1.380   | 0.007 | 0.48  |
| LOC_Os01g53920 | 12.123 ± 0.176   | 32.702 ± 2.415   | 0.007 | 0.37  |
| LOC_Os01g54050 | 4.641 ± 0.117    | 10.765 ± 0.863   | 0.009 | 0.43  |
| LOC_Os01g54350 | 6.239 ± 0.376    | 14.448 ± 1.485   | 0.012 | 0.43  |
| LOC_Os01g54880 | 4.364 ± 0.504    | 10.038 ± 1.638   | 0.030 | 0.43  |
| LOC_Os01g55450 | 4.773 ± 0.515    | 10.482 ± 1.436   | 0.020 | 0.46  |
| LOC_Os01g55510 | 23.914 ± 5.917   | 3.434 ± 0.488    | 0.038 | 6.96  |
| LOC_Os01g55870 | 6.038 ± 0.241    | 15.189 ± 2.503   | 0.034 | 0.40  |
| LOC_Os01g55950 | 17.835 ± 0.900   | 42.415 ± 2.503   | 0.002 | 0.42  |
| LOC_Os01g56350 | 15.621 ± 1.352   | 32.378 ± 4.413   | 0.025 | 0.48  |
| LOC_Os01g57599 | 6.558 ± 0.607    | 43.826 ± 4.905   | 0.008 | 0.15  |
| LOC_Os01g57958 | 48.813 ± 4.507   | 3.588 ± 1.381    | 0.003 | 13.61 |
| LOC_Os01g57962 | 24.669 ± 3.591   | 11.546 ± 1.179   | 0.026 | 2.14  |
| LOC_Os01g57964 | 10.884 ± 1.290   | 4.335 ± 0.248    | 0.016 | 2.51  |

|                |                  |                    |       |       |
|----------------|------------------|--------------------|-------|-------|
| LOC_Os01g58000 | 14.824 ± 0.796   | 3.116 ± 0.952      | 0.000 | 4.76  |
| LOC_Os01g58020 | 122.907 ± 15.280 | 36.284 ± 3.862     | 0.011 | 3.39  |
| LOC_Os01g58039 | 12.107 ± 1.625   | 3.918 ± 0.709      | 0.010 | 3.09  |
| LOC_Os01g58049 | 28.050 ± 5.514   | 9.131 ± 1.637      | 0.031 | 3.07  |
| LOC_Os01g58100 | 16.961 ± 0.920   | 0.187 ± 0.111      | 0.001 | 90.68 |
| LOC_Os01g58420 | 31.267 ± 3.130   | 8.477 ± 2.614      | 0.002 | 3.69  |
| LOC_Os01g58470 | 13.887 ± 1.791   | 33.609 ± 3.887     | 0.009 | 0.41  |
| LOC_Os01g58620 | 40.940 ± 1.721   | 12.878 ± 1.304     | 0.000 | 3.18  |
| LOC_Os01g60280 | 5.100 ± 0.338    | 11.526 ± 0.414     | 0.000 | 0.44  |
| LOC_Os01g60640 | 22.408 ± 2.534   | 3.777 ± 0.277      | 0.009 | 5.93  |
| LOC_Os01g61044 | 12.008 ± 0.140   | 1.223 ± 0.090      | 0.000 | 9.82  |
| LOC_Os01g61670 | 16.309 ± 1.882   | 6.519 ± 0.816      | 0.009 | 2.50  |
| LOC_Os01g62670 | 10.131 ± 1.131   | 1.835 ± 0.675      | 0.002 | 5.52  |
| LOC_Os01g63400 | 10.186 ± 0.657   | 20.589 ± 1.667     | 0.006 | 0.49  |
| LOC_Os01g63410 | 29.139 ± 2.560   | 60.302 ± 3.001     | 0.000 | 0.48  |
| LOC_Os01g64360 | 28.081 ± 3.258   | 7.225 ± 0.612      | 0.010 | 3.89  |
| LOC_Os01g64470 | 52.627 ± 6.058   | 8.218 ± 1.537      | 0.006 | 6.40  |
| LOC_Os01g64680 | 8.198 ± 0.718    | 19.359 ± 2.331     | 0.015 | 0.42  |
| LOC_Os01g65230 | 6.942 ± 0.377    | 15.020 ± 1.353     | 0.010 | 0.46  |
| LOC_Os01g67134 | 28.622 ± 0.971   | 62.437 ± 3.662     | 0.004 | 0.46  |
| LOC_Os01g67810 | 11.304 ± 0.409   | 4.409 ± 0.307      | 0.000 | 2.56  |
| LOC_Os01g68140 | 7.598 ± 0.202    | 17.950 ± 3.076     | 0.041 | 0.42  |
| LOC_Os01g68269 | 59.335 ± 13.482  | 143.679 ± 21.004   | 0.013 | 0.41  |
| LOC_Os01g68300 | 896.499 ± 70.902 | 2439.812 ± 167.582 | 0.002 | 0.37  |
| LOC_Os01g68324 | 9.247 ± 0.603    | 18.565 ± 0.530     | 0.000 | 0.50  |
| LOC_Os01g68450 | 36.447 ± 1.350   | 85.541 ± 7.976     | 0.011 | 0.43  |
| LOC_Os01g68650 | 13.938 ± 2.816   | 0.788 ± 0.412      | 0.020 | 17.68 |
| LOC_Os01g68770 | 37.759 ± 3.031   | 16.367 ± 1.126     | 0.005 | 2.31  |
| LOC_Os01g69120 | 21.399 ± 0.934   | 44.118 ± 1.944     | 0.001 | 0.49  |
| LOC_Os01g69840 | 87.498 ± 7.326   | 272.372 ± 13.747   | 0.000 | 0.32  |
| LOC_Os01g70110 | 5.157 ± 0.631    | 14.946 ± 0.516     | 0.000 | 0.35  |
| LOC_Os01g70120 | 7.731 ± 1.255    | 20.584 ± 3.043     | 0.016 | 0.38  |
| LOC_Os01g70130 | 8.666 ± 0.889    | 17.569 ± 1.225     | 0.002 | 0.49  |
| LOC_Os01g70460 | 11.100 ± 0.873   | 26.048 ± 1.280     | 0.000 | 0.43  |
| LOC_Os01g70710 | 25.865 ± 1.083   | 52.033 ± 5.924     | 0.022 | 0.50  |
| LOC_Os01g70720 | 4.097 ± 0.445    | 13.642 ± 0.935     | 0.001 | 0.30  |
| LOC_Os01g70790 | 189.786 ± 3.941  | 31.022 ± 3.686     | 0.000 | 6.12  |
| LOC_Os01g71340 | 9.590 ± 0.835    | 35.518 ± 3.575     | 0.007 | 0.27  |
| LOC_Os01g71630 | 23.011 ± 1.170   | 51.914 ± 4.966     | 0.011 | 0.44  |
| LOC_Os01g71720 | 8.609 ± 0.647    | 22.800 ± 2.789     | 0.015 | 0.38  |
| LOC_Os01g72100 | 69.451 ± 3.284   | 15.453 ± 1.086     | 0.001 | 4.49  |
| LOC_Os01g72360 | 10.003 ± 2.124   | 1.041 ± 0.154      | 0.026 | 9.61  |
| LOC_Os01g72530 | 98.168 ± 22.459  | 10.959 ± 1.490     | 0.031 | 8.96  |
| LOC_Os01g72800 | 8.931 ± 0.304    | 28.783 ± 2.330     | 0.006 | 0.31  |
| LOC_Os01g72900 | 17.137 ± 1.986   | 4.810 ± 2.070      | 0.004 | 3.56  |

|                |                  |                   |       |       |
|----------------|------------------|-------------------|-------|-------|
| LOC_Os01g72910 | 12.740 ± 2.239   | 5.202 ± 2.042     | 0.025 | 2.45  |
| LOC_Os01g73250 | 168.159 ± 9.731  | 730.147 ± 115.009 | 0.020 | 0.23  |
| LOC_Os01g73450 | 34.774 ± 3.273   | 137.031 ± 4.496   | 0.000 | 0.25  |
| LOC_Os01g73970 | 14.773 ± 0.791   | 35.807 ± 1.206    | 0.000 | 0.41  |
| LOC_Os01g74040 | 40.135 ± 4.087   | 6.484 ± 1.029     | 0.005 | 6.19  |
| LOC_Os01g74160 | 19.375 ± 1.230   | 118.124 ± 4.928   | 0.001 | 0.16  |
| LOC_Os01g74300 | 84.380 ± 5.731   | 387.054 ± 44.973  | 0.010 | 0.22  |
| LOC_Os01g74410 | 12.216 ± 0.665   | 45.584 ± 2.326    | 0.001 | 0.27  |
| LOC_Os01g74540 | 4.231 ± 0.387    | 10.062 ± 1.355    | 0.020 | 0.42  |
| LOC_Os02g01220 | 16.795 ± 0.795   | 7.781 ± 0.694     | 0.000 | 2.16  |
| LOC_Os02g02120 | 10.466 ± 0.615   | 32.674 ± 3.529    | 0.011 | 0.32  |
| LOC_Os02g02390 | 13.516 ± 1.054   | 28.593 ± 1.672    | 0.001 | 0.47  |
| LOC_Os02g02770 | 5.850 ± 0.573    | 12.207 ± 1.190    | 0.007 | 0.48  |
| LOC_Os02g02830 | 22.599 ± 2.216   | 56.110 ± 6.780    | 0.013 | 0.40  |
| LOC_Os02g02860 | 5.122 ± 0.614    | 13.879 ± 0.868    | 0.001 | 0.37  |
| LOC_Os02g03330 | 8.886 ± 0.266    | 19.005 ± 1.815    | 0.014 | 0.47  |
| LOC_Os02g03370 | 5.317 ± 0.606    | 12.331 ± 0.319    | 0.001 | 0.43  |
| LOC_Os02g03710 | 342.529 ± 79.639 | 73.451 ± 12.144   | 0.038 | 4.66  |
| LOC_Os02g03960 | 19.185 ± 2.850   | 51.357 ± 4.966    | 0.003 | 0.37  |
| LOC_Os02g04130 | 23.432 ± 1.263   | 1.510 ± 0.437     | 0.001 | 15.52 |
| LOC_Os02g05470 | 16.827 ± 1.299   | 38.106 ± 4.724    | 0.018 | 0.44  |
| LOC_Os02g05790 | 9.095 ± 1.089    | 18.201 ± 0.480    | 0.002 | 0.50  |
| LOC_Os02g06270 | 4.191 ± 0.612    | 10.287 ± 0.730    | 0.001 | 0.41  |
| LOC_Os02g08440 | 90.279 ± 11.876  | 35.460 ± 3.620    | 0.016 | 2.55  |
| LOC_Os02g09490 | 3.514 ± 0.479    | 10.060 ± 0.142    | 0.001 | 0.35  |
| LOC_Os02g09990 | 14.796 ± 1.140   | 4.362 ± 0.629     | 0.001 | 3.39  |
| LOC_Os02g10810 | 7.900 ± 0.913    | 24.404 ± 4.166    | 0.026 | 0.32  |
| LOC_Os02g11720 | 7.117 ± 1.100    | 18.178 ± 3.405    | 0.034 | 0.39  |
| LOC_Os02g13060 | 59.058 ± 7.109   | 146.097 ± 5.789   | 0.000 | 0.40  |
| LOC_Os02g13130 | 35.775 ± 0.367   | 77.024 ± 5.019    | 0.007 | 0.46  |
| LOC_Os02g13510 | 57.899 ± 1.915   | 148.689 ± 6.431   | 0.001 | 0.39  |
| LOC_Os02g15110 | 4.086 ± 0.789    | 11.497 ± 1.356    | 0.005 | 0.36  |
| LOC_Os02g15120 | 16.922 ± 0.833   | 41.130 ± 3.430    | 0.007 | 0.41  |
| LOC_Os02g15860 | 11.162 ± 3.066   | 2.596 ± 1.604     | 0.039 | 4.30  |
| LOC_Os02g16490 | 4.393 ± 0.555    | 10.036 ± 0.365    | 0.001 | 0.44  |
| LOC_Os02g16620 | 23.424 ± 0.384   | 11.583 ± 0.489    | 0.000 | 2.02  |
| LOC_Os02g17470 | 7.154 ± 0.102    | 19.404 ± 2.201    | 0.016 | 0.37  |
| LOC_Os02g17710 | 4.860 ± 0.442    | 13.375 ± 1.922    | 0.020 | 0.36  |
| LOC_Os02g18070 | 4.236 ± 0.285    | 20.353 ± 1.230    | 0.002 | 0.21  |
| LOC_Os02g18784 | 4.900 ± 1.075    | 16.922 ± 2.737    | 0.015 | 0.29  |
| LOC_Os02g19150 | 6.337 ± 0.529    | 19.233 ± 0.903    | 0.000 | 0.33  |
| LOC_Os02g20360 | 13.096 ± 1.926   | 119.162 ± 3.679   | 0.000 | 0.11  |
| LOC_Os02g20934 | 5.597 ± 0.906    | 14.109 ± 1.426    | 0.004 | 0.40  |
| LOC_Os02g24100 | 4.737 ± 1.959    | 11.448 ± 0.819    | 0.026 | 0.41  |
| LOC_Os02g24598 | 20.148 ± 1.685   | 8.162 ± 3.141     | 0.017 | 2.47  |

|                |                  |                   |       |       |
|----------------|------------------|-------------------|-------|-------|
| LOC_Os02g24604 | 13.983 ± 2.630   | 3.692 ± 1.887     | 0.014 | 3.79  |
| LOC_Os02g24628 | 10.165 ± 2.908   | 0.440 ± 0.321     | 0.040 | 23.11 |
| LOC_Os02g24634 | 43.572 ± 6.970   | 20.599 ± 1.222    | 0.040 | 2.12  |
| LOC_Os02g26700 | 128.824 ± 10.132 | 44.181 ± 2.863    | 0.004 | 2.92  |
| LOC_Os02g28720 | 10.973 ± 0.689   | 5.280 ± 0.956     | 0.003 | 2.08  |
| LOC_Os02g30470 | 17.010 ± 4.736   | 1.276 ± 0.972     | 0.038 | 13.33 |
| LOC_Os02g32580 | 28.540 ± 2.860   | 5.279 ± 1.638     | 0.002 | 5.41  |
| LOC_Os02g32590 | 24.325 ± 0.517   | 9.573 ± 0.511     | 0.000 | 2.54  |
| LOC_Os02g33020 | 8.045 ± 0.327    | 27.918 ± 1.218    | 0.001 | 0.29  |
| LOC_Os02g33070 | 42.197 ± 4.474   | 95.240 ± 10.355   | 0.009 | 0.44  |
| LOC_Os02g33110 | 13.708 ± 1.407   | 33.868 ± 1.851    | 0.000 | 0.40  |
| LOC_Os02g33680 | 79.056 ± 10.226  | 11.599 ± 0.864    | 0.011 | 6.82  |
| LOC_Os02g34580 | 1.918 ± 0.138    | 23.461 ± 1.615    | 0.003 | 0.08  |
| LOC_Os02g35329 | 70.141 ± 7.353   | 25.878 ± 1.012    | 0.012 | 2.71  |
| LOC_Os02g35347 | 38.716 ± 6.537   | 10.509 ± 0.860    | 0.024 | 3.68  |
| LOC_Os02g35365 | 34.473 ± 6.235   | 8.611 ± 1.499     | 0.023 | 4.00  |
| LOC_Os02g35440 | 9.866 ± 1.568    | 21.103 ± 0.840    | 0.003 | 0.47  |
| LOC_Os02g35720 | 4.794 ± 0.969    | 10.146 ± 0.738    | 0.004 | 0.47  |
| LOC_Os02g35820 | 13.877 ± 0.487   | 5.448 ± 0.916     | 0.001 | 2.55  |
| LOC_Os02g36330 | 11.501 ± 0.906   | 5.673 ± 0.297     | 0.007 | 2.03  |
| LOC_Os02g36940 | 69.455 ± 4.420   | 152.250 ± 7.044   | 0.000 | 0.46  |
| LOC_Os02g37090 | 5.390 ± 0.336    | 13.057 ± 0.826    | 0.002 | 0.41  |
| LOC_Os02g37300 | 129.222 ± 26.123 | 49.288 ± 4.398    | 0.046 | 2.62  |
| LOC_Os02g37330 | 44.570 ± 5.988   | 108.974 ± 11.147  | 0.005 | 0.41  |
| LOC_Os02g38160 | 20.814 ± 0.648   | 48.493 ± 2.755    | 0.003 | 0.43  |
| LOC_Os02g38170 | 11.358 ± 0.978   | 33.516 ± 1.560    | 0.000 | 0.34  |
| LOC_Os02g38386 | 13.606 ± 2.464   | 3.025 ± 0.490     | 0.023 | 4.50  |
| LOC_Os02g38920 | 6.597 ± 0.906    | 16.904 ± 0.698    | 0.000 | 0.39  |
| LOC_Os02g39330 | 24.433 ± 6.375   | 52.961 ± 3.808    | 0.010 | 0.46  |
| LOC_Os02g39660 | 9.306 ± 1.980    | 27.743 ± 1.977    | 0.001 | 0.34  |
| LOC_Os02g40040 | 7.725 ± 0.260    | 19.679 ± 2.285    | 0.017 | 0.39  |
| LOC_Os02g40130 | 0.000 ± 0.000    | 28.492 ± 3.441    | 0.007 | 0.00  |
| LOC_Os02g40180 | 0.014 ± 0.020    | 17.154 ± 1.188    | 0.002 | 0.00  |
| LOC_Os02g40190 | 10.12 ± 1.18     | 0.07 ± 0.1        | 0.000 | 0.01  |
| LOC_Os02g40200 | 0.000 ± 0.000    | 30.785 ± 0.554    | 0.000 | 0.00  |
| LOC_Os02g40240 | 0.278 ± 0.071    | 1110.210 ± 31.547 | 0.000 | 0.00  |
| LOC_Os02g40500 | 2.731 ± 0.192    | 10.758 ± 1.856    | 0.025 | 0.25  |
| LOC_Os02g40690 | 6.765 ± 0.544    | 24.703 ± 4.232    | 0.025 | 0.27  |
| LOC_Os02g40700 | 5.089 ± 0.303    | 11.080 ± 1.669    | 0.033 | 0.46  |
| LOC_Os02g40830 | 9.025 ± 0.246    | 18.058 ± 1.784    | 0.017 | 0.50  |
| LOC_Os02g41590 | 4.888 ± 0.492    | 13.291 ± 0.811    | 0.001 | 0.37  |
| LOC_Os02g41680 | 13.021 ± 1.343   | 2.735 ± 0.529     | 0.004 | 4.76  |
| LOC_Os02g41860 | 15.073 ± 0.646   | 7.048 ± 0.869     | 0.001 | 2.14  |
| LOC_Os02g42150 | 3.265 ± 0.619    | 12.209 ± 1.478    | 0.006 | 0.27  |
| LOC_Os02g42160 | 5.017 ± 0.326    | 17.690 ± 1.620    | 0.006 | 0.28  |

|                |                  |                  |       |        |
|----------------|------------------|------------------|-------|--------|
| LOC_Os02g43500 | 43.378 ± 6.097   | 98.683 ± 6.598   | 0.001 | 0.44   |
| LOC_Os02g43540 | 26.357 ± 6.223   | 9.093 ± 2.026    | 0.048 | 2.90   |
| LOC_Os02g43700 | 20.682 ± 1.227   | 8.213 ± 0.287    | 0.003 | 2.52   |
| LOC_Os02g44940 | 20.860 ± 0.111   | 3.951 ± 0.725    | 0.001 | 5.28   |
| LOC_Os02g45225 | 29.081 ± 3.078   | 105.597 ± 7.055  | 0.001 | 0.28   |
| LOC_Os02g45710 | 84.283 ± 11.463  | 21.392 ± 1.806   | 0.014 | 3.94   |
| LOC_Os02g45780 | 27.269 ± 0.468   | 1.068 ± 0.513    | 0.000 | 25.53  |
| LOC_Os02g46220 | 14.789 ± 0.814   | 30.887 ± 2.276   | 0.005 | 0.48   |
| LOC_Os02g47470 | 21.636 ± 3.811   | 3.636 ± 0.247    | 0.021 | 5.95   |
| LOC_Os02g48560 | 24.733 ± 2.835   | 9.460 ± 0.735    | 0.013 | 2.61   |
| LOC_Os02g48710 | 258.632 ± 56.886 | 586.603 ± 82.271 | 0.013 | 0.44   |
| LOC_Os02g48850 | 34.331 ± 5.122   | 0.247 ± 0.349    | 0.011 | 139.10 |
| LOC_Os02g48900 | 18.054 ± 0.581   | 7.891 ± 1.116    | 0.001 | 2.29   |
| LOC_Os02g49760 | 11.528 ± 1.412   | 28.080 ± 1.999   | 0.001 | 0.41   |
| LOC_Os02g50240 | 21.219 ± 3.343   | 49.232 ± 0.876   | 0.005 | 0.43   |
| LOC_Os02g50460 | 4.759 ± 0.499    | 15.254 ± 1.743   | 0.009 | 0.31   |
| LOC_Os02g50470 | 15.583 ± 6.130   | 51.382 ± 0.920   | 0.013 | 0.30   |
| LOC_Os02g50540 | 12.606 ± 3.182   | 26.800 ± 1.854   | 0.010 | 0.47   |
| LOC_Os02g50570 | 19.341 ± 2.283   | 8.555 ± 1.317    | 0.009 | 2.26   |
| LOC_Os02g50600 | 41.424 ± 0.452   | 6.556 ± 1.692    | 0.001 | 6.32   |
| LOC_Os02g50620 | 11.098 ± 1.248   | 24.801 ± 1.220   | 0.000 | 0.45   |
| LOC_Os02g51100 | 11.297 ± 0.922   | 25.594 ± 3.423   | 0.021 | 0.44   |
| LOC_Os02g51350 | 22.420 ± 0.912   | 5.344 ± 0.433    | 0.000 | 4.20   |
| LOC_Os02g51480 | 10.354 ± 1.263   | 21.649 ± 1.908   | 0.004 | 0.48   |
| LOC_Os02g52010 | 34.708 ± 2.810   | 5.092 ± 0.591    | 0.003 | 6.82   |
| LOC_Os02g52170 | 21.471 ± 3.901   | 6.435 ± 1.505    | 0.021 | 3.34   |
| LOC_Os02g52210 | 13.271 ± 0.968   | 0.728 ± 0.215    | 0.002 | 18.22  |
| LOC_Os02g52860 | 10.574 ± 0.426   | 25.287 ± 3.426   | 0.025 | 0.42   |
| LOC_Os02g53180 | 7.457 ± 0.462    | 19.776 ± 1.975   | 0.010 | 0.38   |
| LOC_Os02g53410 | 17.819 ± 2.099   | 6.891 ± 0.335    | 0.016 | 2.59   |
| LOC_Os02g54470 | 93.163 ± 15.304  | 38.226 ± 3.404   | 0.032 | 2.44   |
| LOC_Os02g54780 | 14.908 ± 1.205   | 5.367 ± 0.281    | 0.006 | 2.78   |
| LOC_Os02g54890 | 28.190 ± 2.919   | 3.885 ± 0.922    | 0.004 | 7.26   |
| LOC_Os02g57280 | 150.157 ± 5.629  | 333.589 ± 30.298 | 0.011 | 0.45   |
| LOC_Os02g57290 | 40.554 ± 1.321   | 87.074 ± 9.064   | 0.017 | 0.47   |
| LOC_Os02g57670 | 22.572 ± 1.296   | 64.986 ± 9.735   | 0.024 | 0.35   |
| LOC_Os02g57720 | 41.015 ± 3.429   | 17.001 ± 1.047   | 0.006 | 2.41   |
| LOC_Os02g57924 | 2.879 ± 0.500    | 10.460 ± 0.781   | 0.001 | 0.28   |
| LOC_Os02g58139 | 6.609 ± 0.295    | 14.374 ± 0.266   | 0.000 | 0.46   |
| LOC_Os03g01300 | 70.732 ± 8.605   | 4.460 ± 0.858    | 0.008 | 15.86  |
| LOC_Os03g01320 | 40.509 ± 3.342   | 9.885 ± 0.771    | 0.004 | 4.10   |
| LOC_Os03g01350 | 16.471 ± 1.073   | 33.591 ± 1.429   | 0.000 | 0.49   |
| LOC_Os03g01740 | 60.379 ± 7.608   | 15.706 ± 2.450   | 0.009 | 3.84   |
| LOC_Os03g01830 | 34.412 ± 0.673   | 74.683 ± 1.910   | 0.000 | 0.46   |
| LOC_Os03g02020 | 16.414 ± 0.553   | 51.383 ± 1.696   | 0.000 | 0.32   |

|                |                  |                 |       |       |
|----------------|------------------|-----------------|-------|-------|
| LOC_Os03g02070 | 14.070 ± 2.305   | 3.312 ± 0.632   | 0.017 | 4.25  |
| LOC_Os03g02470 | 0.054 ± 0.076    | 48.457 ± 2.313  | 0.001 | 0.00  |
| LOC_Os03g02550 | 6.825 ± 0.205    | 15.378 ± 1.416  | 0.012 | 0.44  |
| LOC_Os03g03510 | 13.625 ± 1.087   | 4.647 ± 0.657   | 0.001 | 2.93  |
| LOC_Os03g03724 | 4.572 ± 0.669    | 22.737 ± 1.141  | 0.000 | 0.20  |
| LOC_Os03g04370 | 31.815 ± 3.885   | 14.753 ± 3.665  | 0.011 | 2.16  |
| LOC_Os03g04470 | 25.176 ± 2.107   | 58.104 ± 2.294  | 0.000 | 0.43  |
| LOC_Os03g05470 | 8.429 ± 0.652    | 22.988 ± 1.163  | 0.000 | 0.37  |
| LOC_Os03g05750 | 54.756 ± 3.960   | 5.222 ± 0.989   | 0.002 | 10.49 |
| LOC_Os03g06970 | 55.775 ± 5.437   | 2.314 ± 0.442   | 0.005 | 24.10 |
| LOC_Os03g07400 | 18.362 ± 1.234   | 3.934 ± 0.611   | 0.001 | 4.67  |
| LOC_Os03g07870 | 42.833 ± 3.341   | 20.355 ± 1.960  | 0.003 | 2.10  |
| LOC_Os03g07994 | 8.476 ± 1.392    | 23.846 ± 1.200  | 0.000 | 0.36  |
| LOC_Os03g08080 | 10.846 ± 0.370   | 22.660 ± 2.358  | 0.017 | 0.48  |
| LOC_Os03g08280 | 7.873 ± 0.300    | 16.516 ± 0.846  | 0.002 | 0.48  |
| LOC_Os03g08330 | 106.750 ± 15.056 | 4.251 ± 0.811   | 0.010 | 25.11 |
| LOC_Os03g08500 | 170.069 ± 8.295  | 64.924 ± 13.471 | 0.002 | 2.62  |
| LOC_Os03g08520 | 11.447 ± 2.685   | 1.640 ± 0.535   | 0.031 | 6.98  |
| LOC_Os03g08940 | 10.340 ± 1.427   | 2.897 ± 0.914   | 0.006 | 3.57  |
| LOC_Os03g08970 | 57.365 ± 8.436   | 23.839 ± 3.693  | 0.018 | 2.41  |
| LOC_Os03g10100 | 7.049 ± 0.365    | 19.367 ± 0.176  | 0.000 | 0.36  |
| LOC_Os03g10950 | 13.541 ± 1.004   | 5.628 ± 0.278   | 0.005 | 2.41  |
| LOC_Os03g11670 | 8.789 ± 1.055    | 18.480 ± 0.796  | 0.001 | 0.48  |
| LOC_Os03g11780 | 67.203 ± 5.681   | 147.661 ± 6.647 | 0.000 | 0.46  |
| LOC_Os03g12990 | 17.881 ± 3.047   | 41.518 ± 2.937  | 0.001 | 0.43  |
| LOC_Os03g13450 | 21.499 ± 0.827   | 9.566 ± 1.271   | 0.001 | 2.25  |
| LOC_Os03g13840 | 22.297 ± 1.265   | 6.072 ± 0.262   | 0.002 | 3.67  |
| LOC_Os03g14205 | 5.704 ± 0.755    | 27.972 ± 6.238  | 0.035 | 0.20  |
| LOC_Os03g14370 | 15.435 ± 1.653   | 5.984 ± 0.599   | 0.008 | 2.58  |
| LOC_Os03g15110 | 2.699 ± 0.180    | 13.202 ± 2.116  | 0.019 | 0.20  |
| LOC_Os03g15600 | 4.857 ± 0.277    | 10.427 ± 0.800  | 0.006 | 0.47  |
| LOC_Os03g15780 | 15.303 ± 1.094   | 46.004 ± 2.270  | 0.001 | 0.33  |
| LOC_Os03g16030 | 103.543 ± 15.235 | 20.167 ± 4.405  | 0.011 | 5.13  |
| LOC_Os03g16780 | 6.463 ± 0.282    | 16.207 ± 0.759  | 0.001 | 0.40  |
| LOC_Os03g17174 | 5.954 ± 0.845    | 15.930 ± 1.066  | 0.001 | 0.37  |
| LOC_Os03g17200 | 7.532 ± 0.389    | 20.480 ± 0.373  | 0.000 | 0.37  |
| LOC_Os03g17470 | 93.664 ± 3.030   | 42.107 ± 4.931  | 0.001 | 2.22  |
| LOC_Os03g17700 | 24.817 ± 2.848   | 9.675 ± 1.193   | 0.009 | 2.57  |
| LOC_Os03g18070 | 12.139 ± 0.795   | 2.436 ± 0.313   | 0.001 | 4.98  |
| LOC_Os03g18150 | 109.987 ± 11.121 | 32.945 ± 3.059  | 0.007 | 3.34  |
| LOC_Os03g18180 | 5.263 ± 0.757    | 10.749 ± 2.003  | 0.047 | 0.49  |
| LOC_Os03g18200 | 93.033 ± 6.698   | 32.900 ± 0.565  | 0.006 | 2.83  |
| LOC_Os03g18264 | 9.507 ± 0.563    | 23.635 ± 1.221  | 0.001 | 0.40  |
| LOC_Os03g18740 | 18.482 ± 1.794   | 4.850 ± 0.866   | 0.003 | 3.81  |
| LOC_Os03g18779 | 0.033 ± 0.046    | 37.067 ± 0.784  | 0.000 | 0.00  |

|                |                      |                    |       |        |
|----------------|----------------------|--------------------|-------|--------|
| LOC_Os03g18820 | 11.667 ± 0.795       | 3.584 ± 0.521      | 0.001 | 3.26   |
| LOC_Os03g18910 | 24.304 ± 2.311       | 1.684 ± 0.385      | 0.004 | 14.43  |
| LOC_Os03g19040 | 9.714 ± 1.057        | 25.927 ± 2.911     | 0.009 | 0.37   |
| LOC_Os03g19070 | 19.785 ± 3.228       | 1.837 ± 0.509      | 0.014 | 10.77  |
| LOC_Os03g19400 | 16.321 ± 1.512       | 7.157 ± 1.876      | 0.007 | 2.28   |
| LOC_Os03g19720 | 119.746 ± 20.188     | 45.706 ± 10.888    | 0.019 | 2.62   |
| LOC_Os03g20090 | 12.800 ± 2.422       | 2.169 ± 0.310      | 0.023 | 5.90   |
| LOC_Os03g20330 | 35.021 ± 4.836       | 174.628 ± 10.756   | 0.001 | 0.20   |
| LOC_Os03g20600 | 6.357 ± 2.561        | 16.487 ± 0.986     | 0.020 | 0.39   |
| LOC_Os03g20630 | 5.326 ± 0.241        | 11.675 ± 1.606     | 0.028 | 0.46   |
| LOC_Os03g20640 | 37.928 ± 4.430       | 79.323 ± 2.023     | 0.002 | 0.48   |
| LOC_Os03g20780 | 57.716 ± 7.108       | 115.866 ± 3.773    | 0.002 | 0.50   |
| LOC_Os03g21230 | 18.654 ± 1.579       | 46.922 ± 2.918     | 0.001 | 0.40   |
| LOC_Os03g21490 | 11.322 ± 0.061       | 24.472 ± 3.163     | 0.028 | 0.46   |
| LOC_Os03g21664 | 108.572 ± 9.740      | 250.192 ± 9.267    | 0.000 | 0.43   |
| LOC_Os03g22430 | 8.545 ± 0.107        | 22.581 ± 0.172     | 0.000 | 0.38   |
| LOC_Os03g24640 | 15270.343 ± 2977.355 | 57.375 ± 20.606    | 0.019 | 266.15 |
| LOC_Os03g24930 | 26.893 ± 1.551       | 113.493 ± 3.331    | 0.000 | 0.24   |
| LOC_Os03g25500 | 5.573 ± 0.134        | 15.862 ± 1.133     | 0.005 | 0.35   |
| LOC_Os03g27080 | 31.736 ± 2.272       | 76.193 ± 2.738     | 0.000 | 0.42   |
| LOC_Os03g27120 | 46.582 ± 1.776       | 134.025 ± 6.019    | 0.001 | 0.35   |
| LOC_Os03g27830 | 3.798 ± 0.522        | 10.138 ± 1.113     | 0.006 | 0.37   |
| LOC_Os03g29184 | 0.109 ± 0.077        | 32.324 ± 1.314     | 0.001 | 0.00   |
| LOC_Os03g29240 | 32.144 ± 1.202       | 6.706 ± 0.212      | 0.001 | 4.79   |
| LOC_Os03g29770 | 110.109 ± 9.935      | 229.469 ± 14.995   | 0.001 | 0.48   |
| LOC_Os03g29850 | 8.839 ± 2.111        | 36.806 ± 6.511     | 0.018 | 0.24   |
| LOC_Os03g31510 | 150.021 ± 5.855      | 58.036 ± 1.776     | 0.001 | 2.58   |
| LOC_Os03g32160 | 5.646 ± 0.538        | 12.028 ± 1.825     | 0.030 | 0.47   |
| LOC_Os03g36080 | 27.260 ± 1.874       | 11.585 ± 0.764     | 0.003 | 2.35   |
| LOC_Os03g38120 | 5.688 ± 0.963        | 14.127 ± 1.000     | 0.001 | 0.40   |
| LOC_Os03g38150 | 1.671 ± 1.435        | 13.245 ± 2.965     | 0.017 | 0.13   |
| LOC_Os03g38350 | 17.258 ± 1.571       | 41.589 ± 4.052     | 0.007 | 0.41   |
| LOC_Os03g40550 | 5.438 ± 0.976        | 12.358 ± 0.170     | 0.008 | 0.44   |
| LOC_Os03g41390 | 10.404 ± 0.312       | 0.598 ± 0.376      | 0.000 | 17.41  |
| LOC_Os03g42130 | 66.567 ± 0.727       | 10.407 ± 2.784     | 0.001 | 6.40   |
| LOC_Os03g42530 | 18.179 ± 2.194       | 6.797 ± 1.927      | 0.006 | 2.67   |
| LOC_Os03g42600 | 4.907 ± 1.016        | 18.205 ± 2.479     | 0.009 | 0.27   |
| LOC_Os03g43100 | 0.000 ± 0.000        | 15.011 ± 1.856     | 0.008 | 0.00   |
| LOC_Os03g43420 | 9.680 ± 0.291        | 20.319 ± 1.436     | 0.007 | 0.48   |
| LOC_Os03g43810 | 4.546 ± 0.963        | 10.285 ± 1.994     | 0.037 | 0.44   |
| LOC_Os03g45280 | 628.442 ± 41.470     | 1289.663 ± 177.163 | 0.029 | 0.49   |
| LOC_Os03g45370 | 13.284 ± 0.977       | 3.766 ± 0.916      | 0.001 | 3.53   |
| LOC_Os03g45400 | 20.226 ± 1.103       | 61.059 ± 4.917     | 0.005 | 0.33   |
| LOC_Os03g46010 | 14.988 ± 1.634       | 61.118 ± 6.443     | 0.007 | 0.25   |
| LOC_Os03g46070 | 44.491 ± 1.271       | 235.550 ± 10.912   | 0.001 | 0.19   |

|                |                  |                  |       |        |
|----------------|------------------|------------------|-------|--------|
| LOC_Os03g46200 | 9.037 ± 1.349    | 24.461 ± 3.007   | 0.009 | 0.37   |
| LOC_Os03g46230 | 3.071 ± 0.066    | 21.285 ± 1.054   | 0.002 | 0.14   |
| LOC_Os03g47280 | 12.847 ± 0.690   | 2.824 ± 1.431    | 0.003 | 4.55   |
| LOC_Os03g47530 | 17.971 ± 1.935   | 0.150 ± 0.112    | 0.006 | 119.48 |
| LOC_Os03g48060 | 12.668 ± 0.455   | 3.398 ± 1.075    | 0.002 | 3.73   |
| LOC_Os03g48920 | 20.067 ± 0.570   | 40.158 ± 2.514   | 0.006 | 0.50   |
| LOC_Os03g49440 | 15.046 ± 1.014   | 5.333 ± 0.753    | 0.001 | 2.82   |
| LOC_Os03g49720 | 6.888 ± 0.874    | 14.224 ± 1.646   | 0.011 | 0.48   |
| LOC_Os03g50210 | 17.278 ± 3.043   | 2.825 ± 1.114    | 0.013 | 6.12   |
| LOC_Os03g50850 | 6.131 ± 0.176    | 15.700 ± 1.971   | 0.020 | 0.39   |
| LOC_Os03g50960 | 95.010 ± 1.511   | 24.575 ± 4.733   | 0.001 | 3.87   |
| LOC_Os03g51390 | 16.856 ± 2.083   | 5.187 ± 0.391    | 0.013 | 3.25   |
| LOC_Os03g51950 | 18.559 ± 0.186   | 37.625 ± 2.020   | 0.005 | 0.49   |
| LOC_Os03g52410 | 32.412 ± 7.184   | 2.716 ± 1.015    | 0.026 | 11.94  |
| LOC_Os03g52460 | 7.205 ± 0.310    | 15.309 ± 0.978   | 0.004 | 0.47   |
| LOC_Os03g52630 | 11.169 ± 0.043   | 3.538 ± 0.579    | 0.003 | 3.16   |
| LOC_Os03g52640 | 10.620 ± 0.631   | 25.387 ± 0.894   | 0.000 | 0.42   |
| LOC_Os03g52720 | 13.464 ± 1.927   | 4.793 ± 0.699    | 0.015 | 2.81   |
| LOC_Os03g52730 | 11.164 ± 0.395   | 22.917 ± 1.398   | 0.004 | 0.49   |
| LOC_Os03g53010 | 4.991 ± 1.361    | 11.557 ± 1.739   | 0.015 | 0.43   |
| LOC_Os03g53020 | 64.791 ± 2.060   | 14.904 ± 1.325   | 0.000 | 4.35   |
| LOC_Os03g53070 | 127.780 ± 9.662  | 44.880 ± 0.948   | 0.006 | 2.85   |
| LOC_Os03g53230 | 98.466 ± 5.337   | 26.328 ± 3.260   | 0.000 | 3.74   |
| LOC_Os03g53670 | 31.407 ± 1.364   | 63.223 ± 4.322   | 0.005 | 0.50   |
| LOC_Os03g53800 | 12.360 ± 2.275   | 1.864 ± 0.262    | 0.022 | 6.63   |
| LOC_Os03g54900 | 12.666 ± 0.713   | 26.834 ± 0.986   | 0.000 | 0.47   |
| LOC_Os03g55430 | 16.961 ± 3.496   | 3.088 ± 0.988    | 0.023 | 5.49   |
| LOC_Os03g55540 | 271.930 ± 22.237 | 61.543 ± 9.615   | 0.002 | 4.42   |
| LOC_Os03g55590 | 35.447 ± 4.400   | 16.286 ± 1.703   | 0.016 | 2.18   |
| LOC_Os03g55670 | 63.808 ± 2.810   | 155.939 ± 16.400 | 0.013 | 0.41   |
| LOC_Os03g55874 | 10.351 ± 0.750   | 3.470 ± 0.777    | 0.001 | 2.98   |
| LOC_Os03g56000 | 29.496 ± 0.570   | 13.330 ± 1.226   | 0.001 | 2.21   |
| LOC_Os03g56160 | 37.626 ± 7.288   | 83.996 ± 2.168   | 0.008 | 0.45   |
| LOC_Os03g56840 | 9.088 ± 1.009    | 20.615 ± 1.379   | 0.001 | 0.44   |
| LOC_Os03g57220 | 199.540 ± 30.314 | 467.105 ± 10.704 | 0.003 | 0.43   |
| LOC_Os03g57545 | 16.877 ± 4.045   | 39.408 ± 3.602   | 0.004 | 0.43   |
| LOC_Os03g57790 | 17.985 ± 0.870   | 50.567 ± 6.791   | 0.020 | 0.36   |
| LOC_Os03g58300 | 14.380 ± 1.659   | 3.573 ± 0.335    | 0.009 | 4.02   |
| LOC_Os03g59180 | 31.517 ± 4.364   | 85.137 ± 4.568   | 0.000 | 0.37   |
| LOC_Os03g59740 | 40.302 ± 2.307   | 84.370 ± 3.759   | 0.000 | 0.48   |
| LOC_Os03g59770 | 25.383 ± 5.098   | 5.805 ± 0.455    | 0.031 | 4.37   |
| LOC_Os03g59774 | 4.943 ± 0.429    | 11.313 ± 0.646   | 0.001 | 0.44   |
| LOC_Os03g60080 | 293.077 ± 43.510 | 88.794 ± 5.751   | 0.020 | 3.30   |
| LOC_Os03g60090 | 9.611 ± 0.054    | 21.345 ± 0.134   | 0.000 | 0.45   |
| LOC_Os03g60560 | 26.676 ± 4.171   | 3.172 ± 0.956    | 0.012 | 8.41   |

|                |                         |                    |       |        |
|----------------|-------------------------|--------------------|-------|--------|
| LOC_Os03g60650 | 18.736 ± 1.052          | 7.838 ± 1.201      | 0.001 | 2.39   |
| LOC_Os03g60670 | 27.961 ± 4.417          | 3.201 ± 0.553      | 0.014 | 8.73   |
| LOC_Os03g60780 | 72.571 ± 12.705         | 30.455 ± 1.194     | 0.042 | 2.38   |
| LOC_Os03g60820 | 16.926 ± 0.616          | 7.546 ± 0.913      | 0.001 | 2.24   |
| LOC_Os03g61030 | 5.994 ± 0.670           | 15.153 ± 0.593     | 0.000 | 0.40   |
| LOC_Os03g61150 | 40.029 ± 5.242          | 18.847 ± 2.272     | 0.017 | 2.12   |
| LOC_Os03g61260 | 27.706 ± 4.804          | 67.762 ± 4.817     | 0.001 | 0.41   |
| LOC_Os03g61900 | 2.231 ± 1.185           | 27.982 ± 3.686     | 0.006 | 0.08   |
| LOC_Os03g62180 | 15.616 ± 2.613          | 33.473 ± 1.627     | 0.002 | 0.47   |
| LOC_Os03g62379 | 3.382 ± 0.535           | 10.094 ± 0.649     | 0.000 | 0.34   |
| LOC_Os03g62670 | 10.081 ± 3.506          | 25.206 ± 2.357     | 0.010 | 0.40   |
| LOC_Os03g64140 | 7.960 ± 1.339           | 17.294 ± 2.966     | 0.031 | 0.46   |
| LOC_Os04g01330 | 53.820 ± 6.386          | 0.654 ± 0.196      | 0.007 | 82.26  |
| LOC_Os04g01570 | 13.980 ± 0.918          | 6.512 ± 1.736      | 0.012 | 2.15   |
| LOC_Os04g05650 | 35.979 ± 3.275          | 2.790 ± 1.220      | 0.002 | 12.89  |
| LOC_Os04g06520 | 52.561 ± 5.385          | 11.897 ± 2.744     | 0.003 | 4.42   |
| LOC_Os04g07110 | 2.036 ± 0.342           | 28.920 ± 3.075     | 0.006 | 0.07   |
| LOC_Os04g08630 | 1.468 ± 0.271           | 18.981 ± 2.699     | 0.011 | 0.08   |
| LOC_Os04g10160 | 1.610 ± 0.114           | 14.037 ± 1.044     | 0.003 | 0.11   |
| LOC_Os04g10940 | 102.125 ± 1.349         | 242.576 ± 18.467   | 0.008 | 0.42   |
| LOC_Os04g11450 | 14.186 ± 0.667          | 5.019 ± 0.939      | 0.001 | 2.83   |
| LOC_Os04g12600 | 0.000 ± 0.000           | 21.488 ± 1.248     | 0.002 | 0.00   |
| LOC_Os04g14550 | 31.594 ± 3.604          | 0.034 ± 0.033      | 0.006 | 918.00 |
| LOC_Os04g14690 | 3.896 ± 0.063           | 12.521 ± 0.264     | 0.000 | 0.31   |
| LOC_Os04g15580 | 5.279 ± 0.150           | 10.706 ± 0.853     | 0.010 | 0.49   |
| LOC_Os04g15660 | 4.835 ± 0.127           | 13.631 ± 0.355     | 0.000 | 0.35   |
| LOC_Os04g16722 | 12138.694 ±<br>2517.405 | 4356.567 ± 705.921 | 0.040 | 2.79   |
| LOC_Os04g16732 | 19.956 ± 3.003          | 4.387 ± 0.752      | 0.014 | 4.55   |
| LOC_Os04g16745 | 19.768 ± 1.522          | 5.897 ± 1.685      | 0.001 | 3.35   |
| LOC_Os04g16748 | 31.527 ± 3.055          | 12.884 ± 2.048     | 0.003 | 2.45   |
| LOC_Os04g16760 | 11.144 ± 0.515          | 4.326 ± 0.455      | 0.000 | 2.58   |
| LOC_Os04g16770 | 512.476 ± 28.268        | 107.057 ± 21.240   | 0.000 | 4.79   |
| LOC_Os04g16772 | 43.333 ± 7.615          | 15.784 ± 3.838     | 0.020 | 2.75   |
| LOC_Os04g16775 | 10.278 ± 2.243          | 2.403 ± 0.763      | 0.028 | 4.28   |
| LOC_Os04g16816 | 24.776 ± 2.667          | 6.740 ± 0.535      | 0.009 | 3.68   |
| LOC_Os04g16818 | 41.166 ± 2.089          | 13.804 ± 3.501     | 0.002 | 2.98   |
| LOC_Os04g16832 | 11.405 ± 1.623          | 3.076 ± 0.637      | 0.010 | 3.71   |
| LOC_Os04g16872 | 55.394 ± 7.734          | 23.091 ± 1.656     | 0.023 | 2.40   |
| LOC_Os04g16874 | 171.702 ± 27.157        | 65.652 ± 2.628     | 0.030 | 2.62   |
| LOC_Os04g17100 | 19.547 ± 1.169          | 54.513 ± 4.879     | 0.007 | 0.36   |
| LOC_Os04g20164 | 17.942 ± 1.505          | 50.120 ± 0.328     | 0.001 | 0.36   |
| LOC_Os04g21130 | 2.060 ± 0.422           | 10.628 ± 0.797     | 0.001 | 0.19   |
| LOC_Os04g21820 | 3.514 ± 0.119           | 12.330 ± 1.243     | 0.009 | 0.28   |
| LOC_Os04g22270 | 3.847 ± 0.338           | 11.697 ± 1.178     | 0.007 | 0.33   |

|                |                  |                  |       |       |
|----------------|------------------|------------------|-------|-------|
| LOC_Os04g23550 | 71.369 ± 2.362   | 2.196 ± 0.284    | 0.000 | 32.50 |
| LOC_Os04g23820 | 15.062 ± 0.794   | 31.559 ± 1.794   | 0.002 | 0.48  |
| LOC_Os04g24220 | 13.117 ± 1.315   | 50.082 ± 4.687   | 0.005 | 0.26  |
| LOC_Os04g26320 | 6.494 ± 0.469    | 15.767 ± 1.687   | 0.011 | 0.41  |
| LOC_Os04g26910 | 9.271 ± 0.784    | 39.964 ± 3.473   | 0.005 | 0.23  |
| LOC_Os04g26920 | 12.676 ± 1.489   | 233.588 ± 3.180  | 0.000 | 0.05  |
| LOC_Os04g27860 | 10.116 ± 2.306   | 20.513 ± 3.350   | 0.028 | 0.49  |
| LOC_Os04g29550 | 46.211 ± 7.900   | 107.068 ± 14.553 | 0.013 | 0.43  |
| LOC_Os04g29770 | 0.000 ± 0.000    | 21.611 ± 1.088   | 0.001 | 0.00  |
| LOC_Os04g29810 | 0.000 ± 0.000    | 24.789 ± 3.412   | 0.009 | 0.00  |
| LOC_Os04g30030 | 0.407 ± 0.060    | 21.082 ± 0.530   | 0.000 | 0.02  |
| LOC_Os04g30240 | 6.999 ± 0.101    | 15.081 ± 2.020   | 0.030 | 0.46  |
| LOC_Os04g30250 | 6.815 ± 0.446    | 14.708 ± 1.172   | 0.005 | 0.46  |
| LOC_Os04g30420 | 70.172 ± 15.319  | 11.250 ± 0.841   | 0.032 | 6.24  |
| LOC_Os04g31010 | 6.025 ± 0.507    | 13.209 ± 1.163   | 0.006 | 0.46  |
| LOC_Os04g31030 | 24.947 ± 0.479   | 62.226 ± 1.775   | 0.001 | 0.40  |
| LOC_Os04g31040 | 55.047 ± 5.155   | 26.218 ± 1.898   | 0.009 | 2.10  |
| LOC_Os04g31690 | 4.848 ± 0.707    | 13.568 ± 1.560   | 0.007 | 0.36  |
| LOC_Os04g31760 | 18.506 ± 1.504   | 114.747 ± 8.152  | 0.003 | 0.16  |
| LOC_Os04g31820 | 11.544 ± 0.984   | 4.475 ± 1.451    | 0.007 | 2.58  |
| LOC_Os04g32850 | 26.491 ± 3.238   | 4.845 ± 0.740    | 0.008 | 5.47  |
| LOC_Os04g34290 | 5.710 ± 0.207    | 14.781 ± 1.260   | 0.008 | 0.39  |
| LOC_Os04g34320 | 2.301 ± 0.105    | 10.484 ± 1.423   | 0.014 | 0.22  |
| LOC_Os04g35190 | 4.260 ± 0.243    | 10.150 ± 0.798   | 0.005 | 0.42  |
| LOC_Os04g35864 | 2.321 ± 0.190    | 20.120 ± 1.839   | 0.005 | 0.12  |
| LOC_Os04g36570 | 8.714 ± 1.389    | 34.456 ± 2.359   | 0.001 | 0.25  |
| LOC_Os04g36790 | 7.776 ± 1.960    | 17.894 ± 3.748   | 0.043 | 0.43  |
| LOC_Os04g37619 | 35.693 ± 2.549   | 71.490 ± 4.049   | 0.001 | 0.50  |
| LOC_Os04g37710 | 23.269 ± 0.820   | 8.933 ± 0.729    | 0.000 | 2.60  |
| LOC_Os04g37740 | 10.016 ± 0.884   | 21.417 ± 2.301   | 0.011 | 0.47  |
| LOC_Os04g38390 | 107.054 ± 15.493 | 51.018 ± 0.442   | 0.036 | 2.10  |
| LOC_Os04g38480 | 20.646 ± 3.209   | 52.416 ± 2.684   | 0.001 | 0.39  |
| LOC_Os04g38600 | 431.765 ± 18.314 | 191.361 ± 1.112  | 0.003 | 2.26  |
| LOC_Os04g39140 | 7.840 ± 0.471    | 16.207 ± 1.640   | 0.013 | 0.48  |
| LOC_Os04g39700 | 22.868 ± 2.837   | 49.294 ± 3.161   | 0.001 | 0.46  |
| LOC_Os04g39950 | 5.479 ± 0.505    | 11.370 ± 1.191   | 0.010 | 0.48  |
| LOC_Os04g39980 | 11.374 ± 1.974   | 5.639 ± 1.370    | 0.033 | 2.02  |
| LOC_Os04g40420 | 5.916 ± 0.255    | 13.433 ± 1.718   | 0.023 | 0.44  |
| LOC_Os04g41960 | 168.886 ± 18.930 | 28.622 ± 3.926   | 0.007 | 5.90  |
| LOC_Os04g42250 | 8.379 ± 0.855    | 17.707 ± 0.996   | 0.001 | 0.47  |
| LOC_Os04g42520 | 4.033 ± 0.366    | 11.244 ± 0.507   | 0.000 | 0.36  |
| LOC_Os04g43680 | 16.408 ± 0.970   | 4.218 ± 1.047    | 0.000 | 3.89  |
| LOC_Os04g43710 | 5.819 ± 0.483    | 16.099 ± 1.790   | 0.011 | 0.36  |
| LOC_Os04g43770 | 5.077 ± 0.596    | 12.830 ± 1.417   | 0.008 | 0.40  |
| LOC_Os04g43800 | 41.573 ± 1.063   | 7.277 ± 0.041    | 0.000 | 5.71  |

|                |                  |                  |       |       |
|----------------|------------------|------------------|-------|-------|
| LOC_Os04g44430 | 5.866 ± 0.205    | 12.044 ± 0.786   | 0.005 | 0.49  |
| LOC_Os04g44924 | 15.848 ± 3.093   | 37.679 ± 5.831   | 0.018 | 0.42  |
| LOC_Os04g44950 | 7.582 ± 1.858    | 15.548 ± 2.200   | 0.018 | 0.49  |
| LOC_Os04g45460 | 10.075 ± 1.274   | 4.629 ± 0.771    | 0.011 | 2.18  |
| LOC_Os04g45710 | 4.140 ± 0.610    | 10.668 ± 1.728   | 0.023 | 0.39  |
| LOC_Os04g45940 | 59.412 ± 8.891   | 28.797 ± 3.643   | 0.026 | 2.06  |
| LOC_Os04g46010 | 23.693 ± 3.838   | 50.135 ± 1.888   | 0.004 | 0.47  |
| LOC_Os04g46440 | 13.942 ± 1.851   | 3.479 ± 0.893    | 0.006 | 4.01  |
| LOC_Os04g47360 | 41.381 ± 4.313   | 238.666 ± 5.714  | 0.000 | 0.17  |
| LOC_Os04g48030 | 40.759 ± 8.041   | 19.810 ± 4.383   | 0.046 | 2.06  |
| LOC_Os04g48350 | 19.079 ± 2.598   | 0.750 ± 0.151    | 0.010 | 25.43 |
| LOC_Os04g49510 | 26.319 ± 0.989   | 61.573 ± 2.620   | 0.001 | 0.43  |
| LOC_Os04g49660 | 3.782 ± 0.118    | 12.817 ± 0.592   | 0.002 | 0.30  |
| LOC_Os04g49690 | 18.836 ± 0.375   | 6.783 ± 0.788    | 0.000 | 2.78  |
| LOC_Os04g50970 | 24.975 ± 5.063   | 61.277 ± 1.669   | 0.005 | 0.41  |
| LOC_Os04g51280 | 28.777 ± 2.074   | 61.234 ± 1.617   | 0.000 | 0.47  |
| LOC_Os04g51792 | 17.401 ± 0.749   | 37.004 ± 3.192   | 0.010 | 0.47  |
| LOC_Os04g52090 | 101.857 ± 9.393  | 11.384 ± 3.227   | 0.003 | 8.95  |
| LOC_Os04g52260 | 240.114 ± 13.102 | 42.715 ± 4.617   | 0.001 | 5.62  |
| LOC_Os04g52840 | 20.677 ± 2.998   | 9.334 ± 0.728    | 0.028 | 2.22  |
| LOC_Os04g53860 | 3.052 ± 0.207    | 10.847 ± 2.379   | 0.043 | 0.28  |
| LOC_Os04g54630 | 65.881 ± 15.320  | 245.558 ± 19.510 | 0.001 | 0.27  |
| LOC_Os04g55050 | 20.190 ± 1.333   | 42.474 ± 1.993   | 0.000 | 0.48  |
| LOC_Os04g55710 | 33.689 ± 4.882   | 87.008 ± 6.278   | 0.001 | 0.39  |
| LOC_Os04g55980 | 15.081 ± 2.185   | 3.468 ± 1.346    | 0.006 | 4.35  |
| LOC_Os04g57760 | 53.672 ± 2.515   | 24.883 ± 2.720   | 0.000 | 2.16  |
| LOC_Os04g58055 | 28.049 ± 1.060   | 11.720 ± 1.154   | 0.000 | 2.39  |
| LOC_Os04g58280 | 45.518 ± 4.407   | 93.956 ± 2.657   | 0.001 | 0.48  |
| LOC_Os04g58410 | 9.631 ± 0.250    | 22.262 ± 2.618   | 0.020 | 0.43  |
| LOC_Os04g58710 | 47.245 ± 7.856   | 20.394 ± 1.844   | 0.034 | 2.32  |
| LOC_Os04g58810 | 60.640 ± 5.716   | 12.670 ± 1.680   | 0.004 | 4.79  |
| LOC_Os04g58850 | 154.827 ± 17.358 | 36.163 ± 1.055   | 0.010 | 4.28  |
| LOC_Os05g01290 | 229.741 ± 13.261 | 85.465 ± 15.690  | 0.001 | 2.69  |
| LOC_Os05g01675 | 10.694 ± 1.191   | 4.781 ± 1.223    | 0.008 | 2.24  |
| LOC_Os05g02070 | 46.305 ± 0.434   | 187.612 ± 18.354 | 0.008 | 0.25  |
| LOC_Os05g02140 | 12.069 ± 1.792   | 4.362 ± 0.346    | 0.023 | 2.77  |
| LOC_Os05g02770 | 17.623 ± 2.962   | 8.366 ± 1.912    | 0.027 | 2.11  |
| LOC_Os05g03040 | 37.235 ± 7.101   | 95.716 ± 5.033   | 0.001 | 0.39  |
| LOC_Os05g03150 | 5.708 ± 0.054    | 25.622 ± 4.838   | 0.028 | 0.22  |
| LOC_Os05g03620 | 15.614 ± 1.310   | 2.582 ± 0.385    | 0.003 | 6.05  |
| LOC_Os05g03740 | 14.268 ± 1.288   | 6.777 ± 1.323    | 0.005 | 2.11  |
| LOC_Os05g04584 | 3.772 ± 0.366    | 11.781 ± 1.194   | 0.007 | 0.32  |
| LOC_Os05g04700 | 358.813 ± 59.095 | 99.582 ± 7.486   | 0.024 | 3.60  |
| LOC_Os05g04830 | 8.851 ± 0.319    | 22.905 ± 0.483   | 0.000 | 0.39  |
| LOC_Os05g05040 | 44.169 ± 3.837   | 95.410 ± 17.705  | 0.049 | 0.46  |

|                |                  |                  |       |       |
|----------------|------------------|------------------|-------|-------|
| LOC_Os05g05060 | 43.576 ± 4.152   | 94.997 ± 11.677  | 0.016 | 0.46  |
| LOC_Os05g05680 | 24.523 ± 0.872   | 53.225 ± 2.338   | 0.001 | 0.46  |
| LOC_Os05g05940 | 229.521 ± 7.915  | 84.103 ± 4.754   | 0.000 | 2.73  |
| LOC_Os05g06440 | 18.080 ± 1.599   | 49.604 ± 9.496   | 0.039 | 0.36  |
| LOC_Os05g06920 | 11.948 ± 2.524   | 2.958 ± 0.205    | 0.036 | 4.04  |
| LOC_Os05g07632 | 5.099 ± 0.982    | 10.502 ± 0.542   | 0.006 | 0.49  |
| LOC_Os05g08370 | 10.505 ± 0.539   | 3.624 ± 0.111    | 0.002 | 2.90  |
| LOC_Os05g08420 | 159.016 ± 27.706 | 48.393 ± 10.987  | 0.019 | 3.29  |
| LOC_Os05g08860 | 11.474 ± 0.841   | 5.042 ± 1.687    | 0.018 | 2.28  |
| LOC_Os05g08900 | 17.446 ± 0.554   | 4.553 ± 0.461    | 0.000 | 3.83  |
| LOC_Os05g08910 | 25.419 ± 6.405   | 7.794 ± 2.215    | 0.048 | 3.26  |
| LOC_Os05g09020 | 11.129 ± 0.760   | 34.370 ± 4.638   | 0.017 | 0.32  |
| LOC_Os05g09728 | 22.868 ± 1.560   | 56.606 ± 5.786   | 0.010 | 0.40  |
| LOC_Os05g10310 | 14.127 ± 0.086   | 4.359 ± 0.309    | 0.000 | 3.24  |
| LOC_Os05g10414 | 71.995 ± 7.857   | 167.116 ± 18.864 | 0.010 | 0.43  |
| LOC_Os05g10754 | 11.558 ± 1.124   | 23.438 ± 1.763   | 0.003 | 0.49  |
| LOC_Os05g11320 | 87.240 ± 11.605  | 360.942 ± 7.694  | 0.000 | 0.24  |
| LOC_Os05g13904 | 5.364 ± 1.015    | 10.971 ± 0.449   | 0.007 | 0.49  |
| LOC_Os05g13940 | 139.358 ± 13.309 | 38.072 ± 6.112   | 0.003 | 3.66  |
| LOC_Os05g14240 | 48.798 ± 0.734   | 110.961 ± 11.070 | 0.015 | 0.44  |
| LOC_Os05g15770 | 133.352 ± 10.841 | 8.769 ± 0.341    | 0.004 | 15.21 |
| LOC_Os05g19910 | 3.157 ± 0.477    | 11.696 ± 0.632   | 0.000 | 0.27  |
| LOC_Os05g21180 | 5.749 ± 0.263    | 12.812 ± 1.233   | 0.012 | 0.45  |
| LOC_Os05g22716 | 18.857 ± 5.948   | 0.476 ± 0.404    | 0.048 | 39.62 |
| LOC_Os05g22718 | 13.994 ± 3.172   | 2.535 ± 0.399    | 0.034 | 5.52  |
| LOC_Os05g24650 | 52.609 ± 8.338   | 116.800 ± 19.504 | 0.029 | 0.45  |
| LOC_Os05g24970 | 13.027 ± 0.912   | 28.990 ± 4.621   | 0.035 | 0.45  |
| LOC_Os05g25350 | 6.428 ± 0.727    | 13.639 ± 1.865   | 0.021 | 0.47  |
| LOC_Os05g25450 | 27.357 ± 1.437   | 55.725 ± 8.826   | 0.042 | 0.49  |
| LOC_Os05g26990 | 9.430 ± 0.462    | 19.047 ± 0.264   | 0.000 | 0.50  |
| LOC_Os05g27010 | 9.306 ± 1.473    | 19.875 ± 1.677   | 0.003 | 0.47  |
| LOC_Os05g27780 | 157.632 ± 7.633  | 337.021 ± 23.366 | 0.005 | 0.47  |
| LOC_Os05g28740 | 169.969 ± 4.071  | 364.421 ± 6.386  | 0.000 | 0.47  |
| LOC_Os05g29990 | 13.155 ± 0.103   | 28.809 ± 1.590   | 0.005 | 0.46  |
| LOC_Os05g30500 | 49.211 ± 8.465   | 18.273 ± 5.928   | 0.017 | 2.69  |
| LOC_Os05g30850 | 8.392 ± 1.726    | 23.890 ± 3.365   | 0.010 | 0.35  |
| LOC_Os05g31620 | 33.824 ± 1.438   | 4.624 ± 1.532    | 0.000 | 7.31  |
| LOC_Os05g31744 | 4.935 ± 1.207    | 19.797 ± 1.845   | 0.001 | 0.25  |
| LOC_Os05g31750 | 26.692 ± 1.903   | 11.566 ± 1.949   | 0.001 | 2.31  |
| LOC_Os05g32140 | 27.808 ± 1.725   | 58.009 ± 3.920   | 0.003 | 0.48  |
| LOC_Os05g32330 | 5.607 ± 0.602    | 11.933 ± 0.914   | 0.002 | 0.47  |
| LOC_Os05g32680 | 5.213 ± 0.251    | 11.017 ± 1.053   | 0.012 | 0.47  |
| LOC_Os05g32860 | 15.757 ± 2.722   | 1.050 ± 0.830    | 0.011 | 15.01 |
| LOC_Os05g33090 | 172.024 ± 16.902 | 83.043 ± 8.037   | 0.008 | 2.07  |
| LOC_Os05g33210 | 6.859 ± 1.393    | 16.976 ± 0.931   | 0.002 | 0.40  |

|                |                  |                  |       |       |
|----------------|------------------|------------------|-------|-------|
| LOC_Os05g33900 | 19.574 ± 2.128   | 43.653 ± 2.304   | 0.000 | 0.45  |
| LOC_Os05g34500 | 8.184 ± 1.180    | 16.867 ± 1.832   | 0.008 | 0.49  |
| LOC_Os05g34830 | 15.105 ± 0.647   | 5.993 ± 1.367    | 0.004 | 2.52  |
| LOC_Os05g34980 | 2.226 ± 0.138    | 17.718 ± 2.251   | 0.010 | 0.13  |
| LOC_Os05g35140 | 5.434 ± 0.265    | 12.392 ± 1.517   | 0.020 | 0.44  |
| LOC_Os05g35500 | 24.021 ± 3.983   | 8.556 ± 2.357    | 0.015 | 2.81  |
| LOC_Os05g35980 | 4.515 ± 0.368    | 11.599 ± 1.120   | 0.007 | 0.39  |
| LOC_Os05g36994 | 40.150 ± 5.128   | 87.900 ± 5.031   | 0.001 | 0.46  |
| LOC_Os05g37884 | 25.296 ± 2.878   | 8.207 ± 1.120    | 0.007 | 3.08  |
| LOC_Os05g37950 | 5.095 ± 0.324    | 10.894 ± 0.502   | 0.000 | 0.47  |
| LOC_Os05g38630 | 9.866 ± 1.672    | 27.797 ± 5.548   | 0.036 | 0.35  |
| LOC_Os05g38880 | 12.430 ± 0.446   | 28.608 ± 0.711   | 0.000 | 0.43  |
| LOC_Os05g39230 | 4.343 ± 0.274    | 10.374 ± 0.385   | 0.000 | 0.42  |
| LOC_Os05g39930 | 27.130 ± 4.450   | 2.516 ± 0.145    | 0.016 | 10.78 |
| LOC_Os05g40020 | 10.602 ± 1.569   | 26.609 ± 4.179   | 0.022 | 0.40  |
| LOC_Os05g40270 | 18.938 ± 1.603   | 41.455 ± 5.082   | 0.017 | 0.46  |
| LOC_Os05g41460 | 66.654 ± 7.207   | 17.723 ± 3.558   | 0.004 | 3.76  |
| LOC_Os05g41490 | 11.768 ± 2.668   | 3.850 ± 0.747    | 0.044 | 3.06  |
| LOC_Os05g41590 | 18.759 ± 0.340   | 3.421 ± 0.520    | 0.000 | 5.48  |
| LOC_Os05g41780 | 375.156 ± 39.887 | 59.612 ± 4.436   | 0.007 | 6.29  |
| LOC_Os05g42100 | 22.299 ± 2.989   | 47.803 ± 7.856   | 0.032 | 0.47  |
| LOC_Os05g43040 | 48.457 ± 0.403   | 18.025 ± 1.517   | 0.001 | 2.69  |
| LOC_Os05g43170 | 59.635 ± 1.489   | 202.360 ± 22.727 | 0.012 | 0.29  |
| LOC_Os05g43310 | 23.129 ± 1.670   | 63.408 ± 2.357   | 0.000 | 0.36  |
| LOC_Os05g44060 | 21.184 ± 4.582   | 0.901 ± 0.222    | 0.024 | 23.52 |
| LOC_Os05g44340 | 14.482 ± 2.415   | 6.426 ± 1.311    | 0.024 | 2.25  |
| LOC_Os05g44770 | 6.979 ± 0.699    | 27.435 ± 1.967   | 0.002 | 0.25  |
| LOC_Os05g44900 | 66.886 ± 7.725   | 8.757 ± 3.303    | 0.003 | 7.64  |
| LOC_Os05g45710 | 32.822 ± 3.433   | 14.033 ± 1.184   | 0.010 | 2.34  |
| LOC_Os05g46340 | 51.488 ± 5.548   | 15.097 ± 0.652   | 0.011 | 3.41  |
| LOC_Os05g46760 | 31.750 ± 3.073   | 6.657 ± 2.015    | 0.001 | 4.77  |
| LOC_Os05g46830 | 24.249 ± 2.110   | 10.146 ± 3.168   | 0.009 | 2.39  |
| LOC_Os05g47650 | 4.351 ± 0.065    | 19.795 ± 2.507   | 0.013 | 0.22  |
| LOC_Os05g47700 | 39.936 ± 4.583   | 3.934 ± 0.410    | 0.008 | 10.15 |
| LOC_Os05g47960 | 38.684 ± 12.211  | 0.638 ± 0.182    | 0.048 | 60.61 |
| LOC_Os05g48200 | 18.998 ± 1.472   | 41.518 ± 1.880   | 0.000 | 0.46  |
| LOC_Os05g48360 | 8.290 ± 0.988    | 18.706 ± 0.275   | 0.003 | 0.44  |
| LOC_Os05g48900 | 19.493 ± 1.990   | 1.297 ± 0.347    | 0.005 | 15.03 |
| LOC_Os05g48930 | 38.125 ± 2.387   | 12.126 ± 0.910   | 0.002 | 3.14  |
| LOC_Os05g49050 | 4.109 ± 0.500    | 10.133 ± 1.160   | 0.009 | 0.41  |
| LOC_Os05g49140 | 25.548 ± 1.529   | 11.039 ± 2.111   | 0.002 | 2.31  |
| LOC_Os05g49940 | 3.698 ± 0.760    | 14.177 ± 1.935   | 0.009 | 0.26  |
| LOC_Os05g50340 | 9.523 ± 2.388    | 53.204 ± 5.037   | 0.002 | 0.18  |
| LOC_Os05g50624 | 13.023 ± 0.985   | 29.450 ± 2.160   | 0.003 | 0.44  |
| LOC_Os05g50980 | 5.520 ± 0.111    | 15.287 ± 0.804   | 0.003 | 0.36  |

|                |                  |                  |       |       |
|----------------|------------------|------------------|-------|-------|
| LOC_Os05g51670 | 23.773 ± 1.519   | 11.817 ± 1.854   | 0.002 | 2.01  |
| LOC_Os06g02370 | 14.107 ± 1.521   | 31.078 ± 3.079   | 0.007 | 0.45  |
| LOC_Os06g02470 | 20.869 ± 1.620   | 41.967 ± 4.635   | 0.015 | 0.50  |
| LOC_Os06g02500 | 10.749 ± 0.468   | 23.811 ± 0.737   | 0.000 | 0.45  |
| LOC_Os06g03930 | 14.854 ± 0.883   | 5.836 ± 0.177    | 0.004 | 2.55  |
| LOC_Os06g04230 | 210.491 ± 16.096 | 17.737 ± 1.381   | 0.003 | 11.87 |
| LOC_Os06g04240 | 137.237 ± 4.764  | 15.312 ± 2.533   | 0.000 | 8.96  |
| LOC_Os06g05050 | 3.025 ± 0.035    | 13.074 ± 1.477   | 0.011 | 0.23  |
| LOC_Os06g05110 | 10.398 ± 1.643   | 21.795 ± 0.748   | 0.004 | 0.48  |
| LOC_Os06g05390 | 9.630 ± 1.134    | 21.065 ± 1.002   | 0.000 | 0.46  |
| LOC_Os06g05450 | 7.276 ± 0.721    | 18.393 ± 0.647   | 0.000 | 0.40  |
| LOC_Os06g05480 | 70.673 ± 1.957   | 18.253 ± 0.796   | 0.000 | 3.87  |
| LOC_Os06g05520 | 9.152 ± 0.476    | 29.885 ± 2.583   | 0.006 | 0.31  |
| LOC_Os06g06470 | 10.286 ± 1.710   | 5.091 ± 0.347    | 0.045 | 2.02  |
| LOC_Os06g07941 | 5.724 ± 0.454    | 17.130 ± 0.511   | 0.000 | 0.33  |
| LOC_Os06g08041 | 10.296 ± 0.216   | 20.768 ± 0.660   | 0.001 | 0.50  |
| LOC_Os06g08320 | 94.458 ± 14.472  | 211.395 ± 23.034 | 0.006 | 0.45  |
| LOC_Os06g08460 | 5.166 ± 1.004    | 11.884 ± 1.157   | 0.004 | 0.43  |
| LOC_Os06g09560 | 7.311 ± 0.186    | 20.921 ± 3.121   | 0.025 | 0.35  |
| LOC_Os06g09688 | 10.955 ± 1.048   | 24.656 ± 0.452   | 0.001 | 0.44  |
| LOC_Os06g09880 | 11.610 ± 0.103   | 25.343 ± 0.717   | 0.001 | 0.46  |
| LOC_Os06g10840 | 7.874 ± 0.405    | 30.340 ± 1.105   | 0.000 | 0.26  |
| LOC_Os06g11150 | 5.758 ± 1.141    | 14.005 ± 1.292   | 0.003 | 0.41  |
| LOC_Os06g11290 | 20.031 ± 1.141   | 2.074 ± 0.297    | 0.001 | 9.66  |
| LOC_Os06g11760 | 47.776 ± 8.578   | 4.522 ± 0.968    | 0.018 | 10.57 |
| LOC_Os06g11800 | 5.273 ± 0.338    | 12.369 ± 1.121   | 0.008 | 0.43  |
| LOC_Os06g13880 | 1.887 ± 0.248    | 11.773 ± 1.713   | 0.013 | 0.16  |
| LOC_Os06g14240 | 21.556 ± 5.201   | 293.748 ± 30.272 | 0.005 | 0.07  |
| LOC_Os06g14324 | 4.697 ± 0.635    | 22.427 ± 1.279   | 0.000 | 0.21  |
| LOC_Os06g14370 | 11.726 ± 0.525   | 1.054 ± 0.419    | 0.000 | 11.13 |
| LOC_Os06g14400 | 11.011 ± 1.235   | 3.524 ± 0.303    | 0.010 | 3.12  |
| LOC_Os06g14420 | 85.241 ± 3.544   | 16.820 ± 0.712   | 0.001 | 5.07  |
| LOC_Os06g15330 | 23.628 ± 3.577   | 47.880 ± 1.288   | 0.006 | 0.49  |
| LOC_Os06g15730 | 1.146 ± 0.159    | 16.728 ± 1.707   | 0.006 | 0.07  |
| LOC_Os06g16050 | 0.013 ± 0.019    | 35.497 ± 5.140   | 0.010 | 0.00  |
| LOC_Os06g19370 | 14.264 ± 0.878   | 28.679 ± 2.369   | 0.007 | 0.50  |
| LOC_Os06g20820 | 5.499 ± 1.814    | 11.543 ± 1.450   | 0.023 | 0.48  |
| LOC_Os06g21110 | 26.682 ± 1.057   | 78.619 ± 8.201   | 0.011 | 0.34  |
| LOC_Os06g21530 | 21.589 ± 6.201   | 48.918 ± 4.503   | 0.009 | 0.44  |
| LOC_Os06g21820 | 2.189 ± 0.647    | 20.155 ± 2.500   | 0.007 | 0.11  |
| LOC_Os06g22440 | 3.779 ± 0.334    | 14.149 ± 1.668   | 0.010 | 0.27  |
| LOC_Os06g22690 | 22.766 ± 2.367   | 51.212 ± 8.191   | 0.031 | 0.44  |
| LOC_Os06g23775 | 5.513 ± 1.437    | 21.209 ± 1.898   | 0.001 | 0.26  |
| LOC_Os06g25010 | 18.219 ± 1.060   | 2.958 ± 1.287    | 0.000 | 6.16  |
| LOC_Os06g25605 | 4.434 ± 0.432    | 12.302 ± 1.031   | 0.003 | 0.36  |

|                |                  |                  |       |       |
|----------------|------------------|------------------|-------|-------|
| LOC_Os06g28050 | 27.235 ± 2.586   | 57.280 ± 1.187   | 0.001 | 0.48  |
| LOC_Os06g28194 | 10.104 ± 1.486   | 27.179 ± 0.589   | 0.001 | 0.37  |
| LOC_Os06g29730 | 11.249 ± 1.142   | 29.183 ± 3.052   | 0.008 | 0.39  |
| LOC_Os06g32650 | 0.000 ± 0.000    | 11.257 ± 2.024   | 0.016 | 0.00  |
| LOC_Os06g32910 | 0.195 ± 0.142    | 11.398 ± 3.622   | 0.048 | 0.02  |
| LOC_Os06g33200 | 32.607 ± 1.961   | 88.219 ± 1.453   | 0.000 | 0.37  |
| LOC_Os06g33330 | 4.129 ± 0.283    | 10.135 ± 1.180   | 0.015 | 0.41  |
| LOC_Os06g34400 | 4.841 ± 0.415    | 13.340 ± 1.887   | 0.020 | 0.36  |
| LOC_Os06g34450 | 5.472 ± 0.515    | 13.709 ± 0.719   | 0.000 | 0.40  |
| LOC_Os06g35560 | 21.368 ± 1.230   | 66.012 ± 11.708  | 0.032 | 0.32  |
| LOC_Os06g36040 | 3.307 ± 0.364    | 12.517 ± 2.018   | 0.020 | 0.26  |
| LOC_Os06g36270 | 10.900 ± 0.158   | 22.091 ± 0.378   | 0.000 | 0.49  |
| LOC_Os06g37010 | 7.468 ± 0.998    | 29.861 ± 5.160   | 0.022 | 0.25  |
| LOC_Os06g37150 | 13.426 ± 0.944   | 4.677 ± 0.818    | 0.001 | 2.87  |
| LOC_Os06g38210 | 340.684 ± 12.758 | 691.843 ± 40.514 | 0.004 | 0.49  |
| LOC_Os06g38340 | 29.648 ± 1.332   | 85.091 ± 4.337   | 0.001 | 0.35  |
| LOC_Os06g38450 | 166.134 ± 6.545  | 480.157 ± 7.802  | 0.000 | 0.35  |
| LOC_Os06g38580 | 3.804 ± 1.843    | 13.411 ± 2.255   | 0.010 | 0.28  |
| LOC_Os06g38660 | 7.385 ± 1.727    | 24.713 ± 2.991   | 0.005 | 0.30  |
| LOC_Os06g38764 | 0.000 ± 0.000    | 28.000 ± 1.506   | 0.001 | 0.00  |
| LOC_Os06g38830 | 4.217 ± 0.718    | 12.873 ± 0.857   | 0.000 | 0.33  |
| LOC_Os06g39120 | 72.450 ± 2.836   | 34.994 ± 3.334   | 0.000 | 2.07  |
| LOC_Os06g39240 | 339.180 ± 33.868 | 81.285 ± 4.863   | 0.008 | 4.17  |
| LOC_Os06g39690 | 12.674 ± 0.602   | 41.769 ± 0.853   | 0.000 | 0.30  |
| LOC_Os06g39740 | 12.916 ± 1.644   | 2.910 ± 0.172    | 0.013 | 4.44  |
| LOC_Os06g39744 | 11.598 ± 2.519   | 4.676 ± 1.830    | 0.039 | 2.48  |
| LOC_Os06g39750 | 8.329 ± 0.579    | 22.986 ± 1.099   | 0.000 | 0.36  |
| LOC_Os06g40010 | 1.397 ± 0.537    | 10.472 ± 2.065   | 0.020 | 0.13  |
| LOC_Os06g40640 | 100.815 ± 13.352 | 209.914 ± 30.292 | 0.023 | 0.48  |
| LOC_Os06g40940 | 84.409 ± 1.127   | 271.771 ± 17.285 | 0.004 | 0.31  |
| LOC_Os06g41120 | 0.000 ± 0.000    | 155.152 ± 10.053 | 0.002 | 0.00  |
| LOC_Os06g41240 | 0.000 ± 0.000    | 33.400 ± 3.898   | 0.007 | 0.00  |
| LOC_Os06g41720 | 10.267 ± 3.368   | 20.740 ± 2.479   | 0.028 | 0.50  |
| LOC_Os06g43090 | 16.694 ± 0.317   | 4.752 ± 0.897    | 0.001 | 3.51  |
| LOC_Os06g43800 | 13.691 ± 1.468   | 44.529 ± 1.992   | 0.000 | 0.31  |
| LOC_Os06g43810 | 121.341 ± 3.791  | 56.182 ± 5.623   | 0.000 | 2.16  |
| LOC_Os06g43850 | 25.052 ± 1.589   | 56.101 ± 2.190   | 0.000 | 0.45  |
| LOC_Os06g43930 | 5.997 ± 0.166    | 12.288 ± 1.086   | 0.013 | 0.49  |
| LOC_Os06g44170 | 28.590 ± 4.103   | 68.509 ± 7.094   | 0.005 | 0.42  |
| LOC_Os06g45660 | 12.180 ± 1.406   | 31.406 ± 1.060   | 0.000 | 0.39  |
| LOC_Os06g45970 | 14.220 ± 7.022   | 42.639 ± 9.776   | 0.033 | 0.33  |
| LOC_Os06g45980 | 3.847 ± 0.189    | 10.726 ± 0.977   | 0.008 | 0.36  |
| LOC_Os06g46436 | 131.093 ± 10.964 | 43.041 ± 9.808   | 0.001 | 3.05  |
| LOC_Os06g46460 | 71.867 ± 18.790  | 159.792 ± 14.948 | 0.008 | 0.45  |
| LOC_Os06g46950 | 557.147 ± 27.062 | 47.971 ± 1.803   | 0.001 | 11.61 |

|                |                  |                  |       |      |
|----------------|------------------|------------------|-------|------|
| LOC_Os06g47550 | 5.688 ± 0.147    | 11.971 ± 0.768   | 0.006 | 0.48 |
| LOC_Os06g47640 | 60.535 ± 2.619   | 173.519 ± 9.133  | 0.002 | 0.35 |
| LOC_Os06g48680 | 33.154 ± 6.246   | 74.480 ± 1.924   | 0.007 | 0.45 |
| LOC_Os06g48770 | 11.272 ± 0.072   | 26.174 ± 3.231   | 0.023 | 0.43 |
| LOC_Os06g49250 | 33.411 ± 3.016   | 68.263 ± 4.115   | 0.001 | 0.49 |
| LOC_Os06g49780 | 24.093 ± 1.451   | 9.999 ± 1.057    | 0.001 | 2.41 |
| LOC_Os06g50300 | 95.368 ± 1.597   | 220.596 ± 9.679  | 0.002 | 0.43 |
| LOC_Os06g50490 | 8.110 ± 1.248    | 17.496 ± 0.546   | 0.003 | 0.46 |
| LOC_Os06g50539 | 6.792 ± 0.844    | 17.689 ± 1.355   | 0.001 | 0.38 |
| LOC_Os06g50580 | 8.559 ± 1.350    | 19.927 ± 2.822   | 0.016 | 0.43 |
| LOC_Os06g50670 | 7.009 ± 1.331    | 17.816 ± 0.674   | 0.002 | 0.39 |
| LOC_Os06g50706 | 6.938 ± 0.421    | 18.379 ± 1.733   | 0.008 | 0.38 |
| LOC_Os06g50715 | 3.157 ± 0.567    | 11.667 ± 1.042   | 0.002 | 0.27 |
| LOC_Os06g50742 | 6.921 ± 0.866    | 17.217 ± 1.080   | 0.001 | 0.40 |
| LOC_Os06g50818 | 6.183 ± 0.819    | 18.486 ± 1.264   | 0.001 | 0.33 |
| LOC_Os06g51070 | 31.221 ± 5.318   | 83.764 ± 7.554   | 0.002 | 0.37 |
| LOC_Os07g01904 | 1.838 ± 0.181    | 21.220 ± 0.815   | 0.001 | 0.09 |
| LOC_Os07g03025 | 5.667 ± 0.861    | 19.898 ± 0.585   | 0.000 | 0.28 |
| LOC_Os07g03030 | 11.850 ± 1.631   | 34.074 ± 3.502   | 0.005 | 0.35 |
| LOC_Os07g03040 | 9.707 ± 0.823    | 21.245 ± 1.647   | 0.003 | 0.46 |
| LOC_Os07g03050 | 9.387 ± 0.421    | 21.092 ± 3.336   | 0.036 | 0.45 |
| LOC_Os07g03180 | 197.030 ± 3.488  | 72.149 ± 19.812  | 0.011 | 2.73 |
| LOC_Os07g03200 | 8.711 ± 3.455    | 44.724 ± 3.749   | 0.001 | 0.19 |
| LOC_Os07g03910 | 2.063 ± 0.131    | 15.668 ± 0.703   | 0.001 | 0.13 |
| LOC_Os07g03960 | 2.409 ± 0.400    | 23.612 ± 3.253   | 0.011 | 0.10 |
| LOC_Os07g05480 | 811.942 ± 14.434 | 320.577 ± 33.696 | 0.001 | 2.53 |
| LOC_Os07g05580 | 3.859 ± 1.120    | 14.312 ± 0.809   | 0.001 | 0.27 |
| LOC_Os07g05640 | 20.720 ± 3.484   | 53.091 ± 8.106   | 0.018 | 0.39 |
| LOC_Os07g05820 | 142.227 ± 39.801 | 286.634 ± 26.447 | 0.017 | 0.50 |
| LOC_Os07g05840 | 0.309 ± 0.036    | 13.030 ± 0.439   | 0.001 | 0.02 |
| LOC_Os07g06450 | 52.469 ± 3.918   | 111.396 ± 6.008  | 0.001 | 0.47 |
| LOC_Os07g06834 | 0.102 ± 0.083    | 16.932 ± 1.334   | 0.003 | 0.01 |
| LOC_Os07g06850 | 3.760 ± 0.432    | 12.992 ± 0.804   | 0.001 | 0.29 |
| LOC_Os07g07040 | 23.782 ± 1.271   | 3.445 ± 0.665    | 0.000 | 6.90 |
| LOC_Os07g07220 | 7.126 ± 0.622    | 15.753 ± 1.578   | 0.009 | 0.45 |
| LOC_Os07g07620 | 6.448 ± 0.626    | 13.564 ± 2.245   | 0.038 | 0.48 |
| LOC_Os07g08340 | 14.265 ± 2.603   | 30.147 ± 0.828   | 0.008 | 0.47 |
| LOC_Os07g10830 | 11.382 ± 0.586   | 27.315 ± 1.049   | 0.000 | 0.42 |
| LOC_Os07g10840 | 10.410 ± 1.461   | 3.870 ± 0.508    | 0.016 | 2.69 |
| LOC_Os07g11280 | 4.575 ± 0.117    | 10.668 ± 1.253   | 0.020 | 0.43 |
| LOC_Os07g11970 | 3.129 ± 0.555    | 10.211 ± 1.140   | 0.005 | 0.31 |
| LOC_Os07g12340 | 43.132 ± 0.605   | 21.039 ± 1.617   | 0.001 | 2.05 |
| LOC_Os07g12780 | 26.559 ± 2.557   | 58.821 ± 7.959   | 0.021 | 0.45 |
| LOC_Os07g12890 | 37.814 ± 2.932   | 123.491 ± 4.706  | 0.000 | 0.31 |
| LOC_Os07g13230 | 0.644 ± 0.271    | 13.854 ± 1.320   | 0.004 | 0.05 |

|                |                  |                  |       |       |
|----------------|------------------|------------------|-------|-------|
| LOC_Os07g13530 | 12.921 ± 0.389   | 28.318 ± 1.678   | 0.004 | 0.46  |
| LOC_Os07g14740 | 10.938 ± 1.228   | 23.934 ± 0.899   | 0.000 | 0.46  |
| LOC_Os07g17184 | 31.200 ± 3.640   | 74.456 ± 4.818   | 0.001 | 0.42  |
| LOC_Os07g17250 | 7.179 ± 0.569    | 15.508 ± 1.034   | 0.002 | 0.46  |
| LOC_Os07g18240 | 8.092 ± 1.248    | 25.910 ± 1.253   | 0.000 | 0.31  |
| LOC_Os07g18720 | 4.079 ± 0.133    | 10.375 ± 1.259   | 0.018 | 0.39  |
| LOC_Os07g22498 | 130.657 ± 5.008  | 46.036 ± 5.114   | 0.000 | 2.84  |
| LOC_Os07g23510 | 0.103 ± 0.146    | 19.879 ± 4.028   | 0.020 | 0.01  |
| LOC_Os07g23640 | 12.536 ± 2.413   | 0.808 ± 0.361    | 0.019 | 15.51 |
| LOC_Os07g24190 | 12.798 ± 0.455   | 5.581 ± 0.880    | 0.002 | 2.29  |
| LOC_Os07g25018 | 21.288 ± 1.931   | 5.367 ± 1.082    | 0.002 | 3.97  |
| LOC_Os07g25022 | 12.466 ± 2.517   | 3.619 ± 2.024    | 0.020 | 3.44  |
| LOC_Os07g25024 | 44.226 ± 5.690   | 16.108 ± 4.107   | 0.006 | 2.75  |
| LOC_Os07g26520 | 4.186 ± 0.685    | 41.984 ± 6.993   | 0.016 | 0.10  |
| LOC_Os07g27780 | 8.598 ± 2.677    | 19.721 ± 1.349   | 0.014 | 0.44  |
| LOC_Os07g28614 | 58.775 ± 10.613  | 149.378 ± 13.629 | 0.002 | 0.39  |
| LOC_Os07g29224 | 10.691 ± 0.341   | 30.868 ± 5.277   | 0.032 | 0.35  |
| LOC_Os07g30020 | 15.962 ± 0.565   | 31.986 ± 1.926   | 0.004 | 0.50  |
| LOC_Os07g32590 | 5.398 ± 0.451    | 12.396 ± 0.572   | 0.000 | 0.44  |
| LOC_Os07g32650 | 1.287 ± 0.168    | 11.739 ± 0.857   | 0.002 | 0.11  |
| LOC_Os07g33480 | 4.501 ± 1.030    | 11.177 ± 2.184   | 0.033 | 0.40  |
| LOC_Os07g33780 | 20.546 ± 0.663   | 72.776 ± 2.775   | 0.001 | 0.28  |
| LOC_Os07g34650 | 8.463 ± 0.534    | 17.467 ± 0.703   | 0.000 | 0.48  |
| LOC_Os07g34730 | 4.011 ± 0.484    | 11.052 ± 0.754   | 0.001 | 0.36  |
| LOC_Os07g34830 | 0.587 ± 0.100    | 11.156 ± 0.823   | 0.003 | 0.05  |
| LOC_Os07g35004 | 3.964 ± 0.272    | 11.537 ± 1.441   | 0.015 | 0.34  |
| LOC_Os07g35260 | 7.983 ± 0.450    | 16.749 ± 2.272   | 0.028 | 0.48  |
| LOC_Os07g35560 | 15.987 ± 0.472   | 46.943 ± 3.905   | 0.007 | 0.34  |
| LOC_Os07g35680 | 2.002 ± 0.175    | 14.073 ± 0.780   | 0.001 | 0.14  |
| LOC_Os07g35690 | 7.994 ± 0.502    | 24.512 ± 5.105   | 0.043 | 0.33  |
| LOC_Os07g35870 | 4.864 ± 0.320    | 12.009 ± 1.803   | 0.027 | 0.41  |
| LOC_Os07g35979 | 0.275 ± 0.125    | 48.236 ± 8.086   | 0.014 | 0.01  |
| LOC_Os07g36170 | 23.896 ± 0.973   | 7.767 ± 0.832    | 0.000 | 3.08  |
| LOC_Os07g36800 | 3.686 ± 0.622    | 14.907 ± 1.546   | 0.004 | 0.25  |
| LOC_Os07g38630 | 218.279 ± 34.934 | 101.178 ± 21.067 | 0.023 | 2.16  |
| LOC_Os07g38800 | 4.949 ± 0.510    | 15.213 ± 0.601   | 0.000 | 0.33  |
| LOC_Os07g38810 | 8.596 ± 0.926    | 18.995 ± 2.546   | 0.019 | 0.45  |
| LOC_Os07g39780 | 6.048 ± 0.109    | 12.919 ± 0.065   | 0.000 | 0.47  |
| LOC_Os07g40690 | 3.029 ± 0.387    | 10.039 ± 0.978   | 0.004 | 0.30  |
| LOC_Os07g41370 | 4.934 ± 0.434    | 10.496 ± 1.268   | 0.017 | 0.47  |
| LOC_Os07g42040 | 0.000 ± 0.000    | 11.786 ± 2.642   | 0.024 | 0.00  |
| LOC_Os07g42324 | 7.712 ± 1.183    | 20.784 ± 1.551   | 0.001 | 0.37  |
| LOC_Os07g42450 | 8.055 ± 0.694    | 20.531 ± 3.831   | 0.040 | 0.39  |
| LOC_Os07g42650 | 6.139 ± 0.335    | 14.931 ± 1.340   | 0.008 | 0.41  |
| LOC_Os07g42730 | 26.258 ± 2.462   | 57.624 ± 4.454   | 0.003 | 0.46  |

|                |                    |                    |       |         |
|----------------|--------------------|--------------------|-------|---------|
| LOC_Os07g43560 | 86.633 ± 2.792     | 178.694 ± 9.463    | 0.003 | 0.48    |
| LOC_Os07g43800 | 22.194 ± 3.578     | 49.369 ± 7.942     | 0.025 | 0.45    |
| LOC_Os07g43990 | 12.114 ± 0.224     | 1.510 ± 0.287      | 0.000 | 8.02    |
| LOC_Os07g46410 | 11.125 ± 0.740     | 23.991 ± 2.603     | 0.014 | 0.46    |
| LOC_Os07g46600 | 6.238 ± 0.381      | 12.765 ± 1.626     | 0.025 | 0.49    |
| LOC_Os07g46670 | 69.645 ± 8.429     | 27.568 ± 2.110     | 0.015 | 2.53    |
| LOC_Os07g46990 | 46.305 ± 7.628     | 109.084 ± 21.355   | 0.041 | 0.42    |
| LOC_Os07g47400 | 12.264 ± 0.398     | 35.702 ± 1.025     | 0.000 | 0.34    |
| LOC_Os07g48040 | 28.378 ± 2.119     | 63.365 ± 0.876     | 0.000 | 0.45    |
| LOC_Os07g48280 | 36.826 ± 2.072     | 6.619 ± 0.695      | 0.001 | 5.56    |
| LOC_Os07g48490 | 245.624 ± 31.856   | 1210.085 ± 188.697 | 0.016 | 0.20    |
| LOC_Os07g48500 | 227.109 ± 23.183   | 984.521 ± 39.765   | 0.000 | 0.23    |
| LOC_Os07g48510 | 20.332 ± 1.273     | 42.541 ± 0.063     | 0.002 | 0.48    |
| LOC_Os07g48780 | 29.400 ± 1.092     | 80.429 ± 7.286     | 0.009 | 0.37    |
| LOC_Os08g01220 | 24.358 ± 1.113     | 9.923 ± 1.927      | 0.002 | 2.45    |
| LOC_Os08g01240 | 10.791 ± 2.013     | 25.575 ± 1.910     | 0.002 | 0.42    |
| LOC_Os08g01270 | 8.786 ± 0.699      | 19.017 ± 2.038     | 0.012 | 0.46    |
| LOC_Os08g01380 | 1053.140 ± 100.588 | 467.392 ± 37.088   | 0.008 | 2.25    |
| LOC_Os08g01940 | 7.172 ± 0.666      | 15.566 ± 1.071     | 0.002 | 0.46    |
| LOC_Os08g02340 | 43.136 ± 3.453     | 93.351 ± 11.274    | 0.017 | 0.46    |
| LOC_Os08g02680 | 4.618 ± 0.575      | 10.687 ± 0.972     | 0.004 | 0.43    |
| LOC_Os08g05480 | 4.952 ± 1.204      | 11.661 ± 2.540     | 0.047 | 0.42    |
| LOC_Os08g05970 | 1.100 ± 0.770      | 12.898 ± 3.221     | 0.030 | 0.09    |
| LOC_Os08g06100 | 20.819 ± 1.478     | 66.426 ± 5.505     | 0.005 | 0.31    |
| LOC_Os08g06230 | 5.646 ± 0.181      | 12.451 ± 0.505     | 0.001 | 0.45    |
| LOC_Os08g06550 | 12.966 ± 0.829     | 33.621 ± 3.520     | 0.011 | 0.39    |
| LOC_Os08g06800 | 6.059 ± 0.949      | 12.753 ± 1.968     | 0.025 | 0.48    |
| LOC_Os08g07060 | 10.047 ± 0.330     | 20.598 ± 2.797     | 0.032 | 0.49    |
| LOC_Os08g07080 | 64.318 ± 9.129     | 1.355 ± 0.229      | 0.010 | 47.46   |
| LOC_Os08g07660 | 27.744 ± 5.509     | 12.501 ± 3.989     | 0.039 | 2.22    |
| LOC_Os08g07690 | 7.077 ± 0.688      | 20.153 ± 3.679     | 0.034 | 0.35    |
| LOC_Os08g07774 | 10.452 ± 0.534     | 25.967 ± 2.124     | 0.007 | 0.40    |
| LOC_Os08g07830 | 107.199 ± 7.856    | 28.008 ± 1.937     | 0.003 | 3.83    |
| LOC_Os08g08130 | 0.017 ± 0.025      | 18.357 ± 0.892     | 0.001 | 0.00    |
| LOC_Os08g08205 | 5.353 ± 0.449      | 12.113 ± 2.236     | 0.046 | 0.44    |
| LOC_Os08g08690 | 10.435 ± 1.863     | 2.103 ± 0.653      | 0.016 | 4.96    |
| LOC_Os08g09290 | 0.000 ± 0.000      | 12.752 ± 3.067     | 0.028 | 0.00    |
| LOC_Os08g09840 | 28.177 ± 1.387     | 57.337 ± 5.761     | 0.015 | 0.49    |
| LOC_Os08g09860 | 10.192 ± 2.763     | 22.315 ± 3.912     | 0.028 | 0.46    |
| LOC_Os08g10480 | 14.890 ± 0.792     | 5.111 ± 1.178      | 0.001 | 2.91    |
| LOC_Os08g13630 | 5.009 ± 0.443      | 11.229 ± 1.762     | 0.032 | 0.45    |
| LOC_Os08g13690 | 31.486 ± 3.758     | 67.385 ± 10.279    | 0.027 | 0.47    |
| LOC_Os08g13920 | 12.325 ± 1.577     | 1.457 ± 0.420      | 0.007 | 8.46    |
| LOC_Os08g14350 | 51.793 ± 10.596    | 0.050 ± 0.071      | 0.020 | 1036.15 |
| LOC_Os08g14450 | 26.001 ± 0.413     | 54.236 ± 4.970     | 0.015 | 0.48    |

|                |                     |                     |       |      |
|----------------|---------------------|---------------------|-------|------|
| LOC_Os08g14880 | 5.175 ± 0.082       | 24.808 ± 1.320      | 0.002 | 0.21 |
| LOC_Os08g15266 | 43.571 ± 0.958      | 15.711 ± 0.445      | 0.000 | 2.77 |
| LOC_Os08g15278 | 11.502 ± 1.307      | 2.286 ± 0.741       | 0.003 | 5.03 |
| LOC_Os08g15460 | 5.225 ± 0.635       | 17.104 ± 0.990      | 0.000 | 0.31 |
| LOC_Os08g15500 | 6.580 ± 0.305       | 13.711 ± 1.263      | 0.012 | 0.48 |
| LOC_Os08g15650 | 14.803 ± 1.635      | 30.270 ± 2.738      | 0.005 | 0.49 |
| LOC_Os08g19480 | 2.863 ± 0.256       | 18.477 ± 1.024      | 0.001 | 0.15 |
| LOC_Os08g19670 | 16.825 ± 1.218      | 5.583 ± 0.971       | 0.001 | 3.01 |
| LOC_Os08g24160 | 0.000 ± 0.000       | 12.220 ± 1.092      | 0.004 | 0.00 |
| LOC_Os08g25050 | 3.714 ± 0.622       | 23.547 ± 1.458      | 0.001 | 0.16 |
| LOC_Os08g25090 | 11.517 ± 0.680      | 23.790 ± 2.708      | 0.019 | 0.48 |
| LOC_Os08g26230 | 36.193 ± 1.061      | 146.147 ± 6.534     | 0.001 | 0.25 |
| LOC_Os08g26820 | 6.279 ± 0.520       | 19.434 ± 3.372      | 0.029 | 0.32 |
| LOC_Os08g26870 | 51.934 ± 2.470      | 111.017 ± 10.155    | 0.011 | 0.47 |
| LOC_Os08g28670 | 4.792 ± 0.675       | 14.226 ± 2.909      | 0.038 | 0.34 |
| LOC_Os08g29020 | 7.450 ± 0.338       | 25.207 ± 3.114      | 0.014 | 0.30 |
| LOC_Os08g29110 | 7.962 ± 0.284       | 20.017 ± 1.821      | 0.010 | 0.40 |
| LOC_Os08g31219 | 16.082 ± 0.676      | 7.467 ± 2.258       | 0.025 | 2.15 |
| LOC_Os08g31850 | 17.040 ± 1.479      | 4.015 ± 0.888       | 0.001 | 4.24 |
| LOC_Os08g32930 | 34.833 ± 3.990      | 78.672 ± 6.412      | 0.002 | 0.44 |
| LOC_Os08g33150 | 3.991 ± 0.254       | 16.117 ± 0.217      | 0.000 | 0.25 |
| LOC_Os08g34010 | 11.700 ± 1.411      | 28.448 ± 1.911      | 0.001 | 0.41 |
| LOC_Os08g35319 | 6.829 ± 1.427       | 14.785 ± 1.619      | 0.007 | 0.46 |
| LOC_Os08g35420 | 472.751 ± 17.935    | 115.535 ± 21.895    | 0.000 | 4.09 |
| LOC_Os08g37060 | 14.685 ± 1.025      | 6.990 ± 1.375       | 0.004 | 2.10 |
| LOC_Os08g37370 | 92.756 ± 15.184     | 22.473 ± 1.617      | 0.022 | 4.13 |
| LOC_Os08g37700 | 16.088 ± 0.646      | 36.492 ± 2.097      | 0.003 | 0.44 |
| LOC_Os08g38086 | 9.452 ± 1.123       | 19.840 ± 3.032      | 0.028 | 0.48 |
| LOC_Os08g38160 | 3.387 ± 0.766       | 10.775 ± 1.989      | 0.023 | 0.31 |
| LOC_Os08g38910 | 11.017 ± 0.092      | 1.914 ± 0.127       | 0.000 | 5.76 |
| LOC_Os08g39450 | 265.380 ± 17.627    | 107.839 ± 14.054    | 0.001 | 2.46 |
| LOC_Os08g39840 | 5.588 ± 0.712       | 16.359 ± 0.361      | 0.000 | 0.34 |
| LOC_Os08g40620 | 10.817 ± 0.045      | 25.176 ± 3.788      | 0.033 | 0.43 |
| LOC_Os08g40870 | 7.873 ± 0.929       | 19.497 ± 2.572      | 0.015 | 0.40 |
| LOC_Os08g41090 | 15.498 ± 1.019      | 41.493 ± 2.879      | 0.003 | 0.37 |
| LOC_Os08g41280 | 55.828 ± 4.423      | 25.782 ± 3.139      | 0.002 | 2.17 |
| LOC_Os08g41440 | 30.852 ± 1.921      | 3.931 ± 0.217       | 0.002 | 7.85 |
| LOC_Os08g41880 | 10.110 ± 0.926      | 3.193 ± 0.582       | 0.002 | 3.17 |
| LOC_Os08g41990 | 97.668 ± 4.747      | 225.933 ± 7.090     | 0.000 | 0.43 |
| LOC_Os08g42800 | 30.037 ± 3.674      | 8.848 ± 2.387       | 0.004 | 3.39 |
| LOC_Os08g43550 | 6.644 ± 0.892       | 23.943 ± 0.829      | 0.000 | 0.28 |
| LOC_Os08g44480 | 24.688 ± 1.788      | 57.622 ± 3.320      | 0.001 | 0.43 |
| LOC_Os08g44640 | 7.102 ± 0.246       | 15.520 ± 1.643      | 0.017 | 0.46 |
| LOC_Os08g45190 | 40.974 ± 6.271      | 14.727 ± 2.549      | 0.016 | 2.78 |
| LOC_Os09g00999 | 18905.977 ± 506.656 | 6355.795 ± 1311.531 | 0.002 | 2.97 |

|                |                     |                     |       |       |
|----------------|---------------------|---------------------|-------|-------|
| LOC_Os09g01000 | 11336.240 ± 644.544 | 3483.679 ± 1290.297 | 0.005 | 3.25  |
| LOC_Os09g04290 | 5.378 ± 0.683       | 10.872 ± 1.116      | 0.007 | 0.49  |
| LOC_Os09g04300 | 9.045 ± 0.765       | 18.474 ± 1.492      | 0.004 | 0.49  |
| LOC_Os09g04310 | 20.061 ± 2.157      | 40.329 ± 3.518      | 0.004 | 0.50  |
| LOC_Os09g04430 | 7.018 ± 1.250       | 21.463 ± 3.011      | 0.011 | 0.33  |
| LOC_Os09g04690 | 29.318 ± 6.588      | 2.768 ± 1.970       | 0.022 | 10.59 |
| LOC_Os09g06740 | 7.058 ± 0.911       | 15.525 ± 2.788      | 0.039 | 0.45  |
| LOC_Os09g09520 | 5.362 ± 0.628       | 11.527 ± 0.920      | 0.002 | 0.47  |
| LOC_Os09g09830 | 14.325 ± 1.124      | 74.315 ± 11.423     | 0.017 | 0.19  |
| LOC_Os09g10930 | 9.523 ± 0.078       | 20.748 ± 3.542      | 0.046 | 0.46  |
| LOC_Os09g11480 | 16.177 ± 1.032      | 51.889 ± 6.019      | 0.012 | 0.31  |
| LOC_Os09g13440 | 29.770 ± 1.404      | 87.789 ± 7.288      | 0.006 | 0.34  |
| LOC_Os09g13570 | 76.844 ± 2.319      | 182.771 ± 15.305    | 0.009 | 0.42  |
| LOC_Os09g13575 | 19.217 ± 5.519      | 41.933 ± 1.453      | 0.022 | 0.46  |
| LOC_Os09g14614 | 11.713 ± 1.112      | 23.942 ± 2.583      | 0.011 | 0.49  |
| LOC_Os09g16950 | 20.920 ± 1.990      | 60.287 ± 5.045      | 0.004 | 0.35  |
| LOC_Os09g17329 | 0.002 ± 0.003       | 40.943 ± 2.817      | 0.002 | 0.00  |
| LOC_Os09g17344 | 0.039 ± 0.027       | 11.765 ± 1.865      | 0.012 | 0.00  |
| LOC_Os09g18594 | 0.010 ± 0.014       | 36.251 ± 2.782      | 0.003 | 0.00  |
| LOC_Os09g19150 | 0.032 ± 0.023       | 12.975 ± 0.991      | 0.003 | 0.00  |
| LOC_Os09g19160 | 0.370 ± 0.084       | 11.232 ± 1.607      | 0.011 | 0.03  |
| LOC_Os09g19280 | 0.505 ± 0.091       | 14.556 ± 0.814      | 0.001 | 0.03  |
| LOC_Os09g19310 | 0.581 ± 0.093       | 16.677 ± 2.329      | 0.010 | 0.03  |
| LOC_Os09g19380 | 0.058 ± 0.083       | 19.974 ± 0.479      | 0.000 | 0.00  |
| LOC_Os09g19390 | 0.031 ± 0.043       | 15.814 ± 3.755      | 0.027 | 0.00  |
| LOC_Os09g19560 | 8.234 ± 1.066       | 16.538 ± 2.199      | 0.019 | 0.50  |
| LOC_Os09g19820 | 7.014 ± 0.707       | 17.795 ± 0.241      | 0.001 | 0.39  |
| LOC_Os09g19850 | 7.132 ± 0.638       | 14.283 ± 1.339      | 0.007 | 0.50  |
| LOC_Os09g19952 | 29.600 ± 2.897      | 6.147 ± 0.653       | 0.006 | 4.82  |
| LOC_Os09g19954 | 12.825 ± 1.583      | 2.420 ± 0.410       | 0.008 | 5.30  |
| LOC_Os09g20390 | 15.786 ± 2.606      | 7.322 ± 0.513       | 0.040 | 2.16  |
| LOC_Os09g20930 | 19.645 ± 3.056      | 9.501 ± 2.082       | 0.023 | 2.07  |
| LOC_Os09g21180 | 3.944 ± 0.773       | 18.178 ± 1.398      | 0.001 | 0.22  |
| LOC_Os09g21210 | 12.295 ± 0.873      | 1.560 ± 0.084       | 0.003 | 7.88  |
| LOC_Os09g21710 | 31.433 ± 4.582      | 6.963 ± 1.029       | 0.014 | 4.51  |
| LOC_Os09g23430 | 13.949 ± 4.145      | 49.973 ± 9.085      | 0.017 | 0.28  |
| LOC_Os09g24406 | 21.735 ± 3.171      | 5.532 ± 0.728       | 0.015 | 3.93  |
| LOC_Os09g24408 | 11.085 ± 1.577      | 2.163 ± 0.395       | 0.011 | 5.12  |
| LOC_Os09g24412 | 44.420 ± 8.416      | 11.703 ± 3.294      | 0.020 | 3.80  |
| LOC_Os09g25690 | 18.254 ± 2.418      | 2.128 ± 0.781       | 0.007 | 8.58  |
| LOC_Os09g26620 | 74.935 ± 2.337      | 208.326 ± 23.890    | 0.015 | 0.36  |
| LOC_Os09g26780 | 15.258 ± 1.918      | 4.321 ± 1.413       | 0.004 | 3.53  |
| LOC_Os09g27010 | 24.733 ± 2.662      | 10.858 ± 1.152      | 0.009 | 2.28  |
| LOC_Os09g27734 | 12.656 ± 1.324      | 29.908 ± 5.716      | 0.045 | 0.42  |
| LOC_Os09g28440 | 27.766 ± 3.790      | 0.427 ± 0.167       | 0.009 | 64.96 |

|                |                  |                  |       |       |
|----------------|------------------|------------------|-------|-------|
| LOC_Os09g28550 | 4.601 ± 0.973    | 10.020 ± 1.770   | 0.030 | 0.46  |
| LOC_Os09g28640 | 10.564 ± 0.291   | 21.727 ± 3.238   | 0.039 | 0.49  |
| LOC_Os09g28650 | 13.418 ± 2.790   | 65.158 ± 4.574   | 0.001 | 0.21  |
| LOC_Os09g29270 | 0.000 ± 0.000    | 58.910 ± 1.059   | 0.000 | 0.00  |
| LOC_Os09g29390 | 3.809 ± 0.745    | 11.139 ± 1.226   | 0.004 | 0.34  |
| LOC_Os09g29520 | 26.808 ± 1.754   | 73.441 ± 10.923  | 0.024 | 0.37  |
| LOC_Os09g29540 | 13.553 ± 0.345   | 45.340 ± 7.200   | 0.024 | 0.30  |
| LOC_Os09g29560 | 4.884 ± 0.544    | 12.010 ± 2.212   | 0.038 | 0.41  |
| LOC_Os09g29840 | 42.171 ± 1.173   | 84.593 ± 4.234   | 0.003 | 0.50  |
| LOC_Os09g30130 | 4.601 ± 0.366    | 11.142 ± 0.725   | 0.002 | 0.41  |
| LOC_Os09g30300 | 16.523 ± 1.227   | 3.003 ± 2.064    | 0.003 | 5.50  |
| LOC_Os09g30340 | 236.692 ± 7.991  | 111.498 ± 10.026 | 0.000 | 2.12  |
| LOC_Os09g30350 | 89.819 ± 4.924   | 43.803 ± 4.421   | 0.001 | 2.05  |
| LOC_Os09g30418 | 49.414 ± 1.175   | 130.529 ± 5.236  | 0.001 | 0.38  |
| LOC_Os09g30438 | 38.765 ± 2.135   | 99.691 ± 4.062   | 0.000 | 0.39  |
| LOC_Os09g30466 | 7.377 ± 0.601    | 17.579 ± 0.842   | 0.000 | 0.42  |
| LOC_Os09g31031 | 14.833 ± 0.261   | 3.211 ± 0.919    | 0.002 | 4.62  |
| LOC_Os09g31200 | 301.278 ± 34.271 | 64.484 ± 2.150   | 0.010 | 4.67  |
| LOC_Os09g32000 | 10.347 ± 0.495   | 2.849 ± 1.067    | 0.004 | 3.63  |
| LOC_Os09g32080 | 11.154 ± 0.309   | 3.276 ± 1.580    | 0.017 | 3.41  |
| LOC_Os09g32169 | 0.731 ± 0.195    | 174.960 ± 30.078 | 0.015 | 0.00  |
| LOC_Os09g33470 | 15.189 ± 0.548   | 35.060 ± 1.715   | 0.002 | 0.43  |
| LOC_Os09g33490 | 4.615 ± 0.257    | 10.613 ± 1.220   | 0.017 | 0.43  |
| LOC_Os09g35010 | 109.578 ± 11.576 | 2.746 ± 1.162    | 0.005 | 39.91 |
| LOC_Os09g35020 | 10.362 ± 1.623   | 0.867 ± 1.125    | 0.004 | 11.95 |
| LOC_Os09g35030 | 29.807 ± 2.122   | 0.718 ± 0.399    | 0.002 | 41.51 |
| LOC_Os09g37540 | 5.591 ± 0.626    | 11.278 ± 1.777   | 0.034 | 0.50  |
| LOC_Os09g39230 | 8.929 ± 1.537    | 18.355 ± 0.786   | 0.005 | 0.49  |
| LOC_Os09g39740 | 6.797 ± 0.321    | 18.574 ± 0.980   | 0.002 | 0.37  |
| LOC_Os10g01470 | 28.900 ± 4.198   | 59.092 ± 6.999   | 0.011 | 0.49  |
| LOC_Os10g02380 | 5.385 ± 0.346    | 12.261 ± 1.163   | 0.009 | 0.44  |
| LOC_Os10g02480 | 22.954 ± 0.555   | 50.103 ± 3.161   | 0.006 | 0.46  |
| LOC_Os10g04050 | 8.345 ± 1.242    | 16.719 ± 2.030   | 0.012 | 0.50  |
| LOC_Os10g04570 | 2.448 ± 0.517    | 15.966 ± 0.657   | 0.000 | 0.15  |
| LOC_Os10g04720 | 4.902 ± 0.755    | 12.764 ± 2.267   | 0.029 | 0.38  |
| LOC_Os10g04730 | 11.980 ± 0.713   | 29.962 ± 3.485   | 0.015 | 0.40  |
| LOC_Os10g05250 | 1.327 ± 0.128    | 35.916 ± 6.355   | 0.016 | 0.04  |
| LOC_Os10g05780 | 5.956 ± 0.729    | 12.772 ± 0.851   | 0.001 | 0.47  |
| LOC_Os10g09240 | 27.928 ± 3.359   | 13.456 ± 3.168   | 0.011 | 2.08  |
| LOC_Os10g10175 | 7.760 ± 1.127    | 15.998 ± 2.612   | 0.032 | 0.49  |
| LOC_Os10g10244 | 8.103 ± 0.303    | 17.256 ± 0.850   | 0.002 | 0.47  |
| LOC_Os10g11870 | 4.365 ± 0.225    | 13.965 ± 1.712   | 0.014 | 0.31  |
| LOC_Os10g14870 | 14.973 ± 0.583   | 33.807 ± 5.296   | 0.036 | 0.44  |
| LOC_Os10g18490 | 4.971 ± 1.648    | 25.181 ± 0.181   | 0.003 | 0.20  |
| LOC_Os10g20090 | 5.414 ± 0.276    | 14.331 ± 1.048   | 0.004 | 0.38  |

|                |                   |                    |       |       |
|----------------|-------------------|--------------------|-------|-------|
| LOC_Os10g20310 | 9.073 ± 0.614     | 22.660 ± 1.951     | 0.006 | 0.40  |
| LOC_Os10g20380 | 2.789 ± 0.470     | 10.974 ± 0.889     | 0.001 | 0.25  |
| LOC_Os10g20480 | 0.008 ± 0.011     | 31.320 ± 0.846     | 0.000 | 0.00  |
| LOC_Os10g21190 | 3497.965 ± 38.125 | 1204.542 ± 748.157 | 0.049 | 2.90  |
| LOC_Os10g21192 | 444.797 ± 23.466  | 113.399 ± 18.834   | 0.000 | 3.92  |
| LOC_Os10g21230 | 23.202 ± 4.695    | 9.237 ± 1.095      | 0.046 | 2.51  |
| LOC_Os10g21238 | 30.153 ± 2.014    | 10.952 ± 2.305     | 0.001 | 2.75  |
| LOC_Os10g21244 | 23.043 ± 0.541    | 5.663 ± 1.423      | 0.001 | 4.07  |
| LOC_Os10g21248 | 25.364 ± 4.639    | 10.840 ± 1.679     | 0.035 | 2.34  |
| LOC_Os10g21250 | 10.072 ± 1.026    | 5.024 ± 0.329      | 0.013 | 2.00  |
| LOC_Os10g21266 | 19.717 ± 2.411    | 4.667 ± 0.073      | 0.013 | 4.23  |
| LOC_Os10g21268 | 426.688 ± 8.657   | 82.223 ± 15.274    | 0.000 | 5.19  |
| LOC_Os10g21352 | 33.121 ± 3.729    | 9.231 ± 3.803      | 0.003 | 3.59  |
| LOC_Os10g21372 | 22.444 ± 2.568    | 9.782 ± 1.823      | 0.006 | 2.29  |
| LOC_Os10g21394 | 17.621 ± 0.965    | 4.483 ± 0.559      | 0.000 | 3.93  |
| LOC_Os10g21406 | 126.822 ± 6.505   | 45.603 ± 11.758    | 0.003 | 2.78  |
| LOC_Os10g21418 | 10.066 ± 1.556    | 4.463 ± 0.420      | 0.030 | 2.26  |
| LOC_Os10g21560 | 5.732 ± 0.390     | 11.675 ± 1.101     | 0.010 | 0.49  |
| LOC_Os10g24970 | 4.915 ± 1.044     | 10.284 ± 1.937     | 0.039 | 0.48  |
| LOC_Os10g25230 | 28.994 ± 0.507    | 0.873 ± 0.420      | 0.000 | 33.21 |
| LOC_Os10g25290 | 27.883 ± 2.634    | 4.327 ± 1.086      | 0.002 | 6.44  |
| LOC_Os10g25430 | 5.765 ± 0.394     | 17.838 ± 1.604     | 0.006 | 0.32  |
| LOC_Os10g27340 | 16.496 ± 1.089    | 38.378 ± 2.985     | 0.005 | 0.43  |
| LOC_Os10g28050 | 22.109 ± 1.636    | 63.451 ± 3.475     | 0.001 | 0.35  |
| LOC_Os10g28080 | 3.683 ± 0.674     | 12.064 ± 1.774     | 0.013 | 0.31  |
| LOC_Os10g28210 | 6.185 ± 0.248     | 18.941 ± 3.268     | 0.031 | 0.33  |
| LOC_Os10g30410 | 8.160 ± 0.348     | 16.885 ± 0.741     | 0.001 | 0.48  |
| LOC_Os10g30880 | 12.643 ± 1.423    | 29.270 ± 2.771     | 0.005 | 0.43  |
| LOC_Os10g31320 | 86.958 ± 15.105   | 19.532 ± 4.490     | 0.018 | 4.45  |
| LOC_Os10g31330 | 269.796 ± 35.787  | 45.173 ± 1.719     | 0.012 | 5.97  |
| LOC_Os10g32444 | 5.058 ± 0.744     | 11.488 ± 2.296     | 0.047 | 0.44  |
| LOC_Os10g32520 | 4.696 ± 0.269     | 10.250 ± 0.949     | 0.010 | 0.46  |
| LOC_Os10g32730 | 7.989 ± 0.624     | 18.624 ± 2.547     | 0.022 | 0.43  |
| LOC_Os10g32770 | 12.434 ± 0.713    | 25.645 ± 1.627     | 0.003 | 0.48  |
| LOC_Os10g32810 | 25.927 ± 1.473    | 8.004 ± 0.523      | 0.001 | 3.24  |
| LOC_Os10g33210 | 4.065 ± 0.065     | 11.166 ± 0.943     | 0.008 | 0.36  |
| LOC_Os10g33990 | 22.994 ± 4.457    | 10.860 ± 1.708     | 0.047 | 2.12  |
| LOC_Os10g34180 | 6.568 ± 0.153     | 24.822 ± 1.374     | 0.003 | 0.26  |
| LOC_Os10g34409 | 0.241 ± 0.134     | 21.154 ± 2.017     | 0.004 | 0.01  |
| LOC_Os10g34795 | 33.387 ± 8.979    | 76.813 ± 2.919     | 0.014 | 0.43  |
| LOC_Os10g34940 | 4.515 ± 0.684     | 13.153 ± 1.397     | 0.005 | 0.34  |
| LOC_Os10g35140 | 6.779 ± 0.914     | 14.395 ± 1.865     | 0.015 | 0.47  |
| LOC_Os10g35770 | 5.372 ± 0.666     | 19.275 ± 1.729     | 0.003 | 0.28  |
| LOC_Os10g36260 | 87.029 ± 2.496    | 191.426 ± 22.669   | 0.022 | 0.45  |
| LOC_Os10g36500 | 64.272 ± 12.854   | 5.604 ± 1.027      | 0.023 | 11.47 |

|                |                  |                  |       |        |
|----------------|------------------|------------------|-------|--------|
| LOC_Os10g36580 | 71.439 ± 10.693  | 9.338 ± 1.906    | 0.012 | 7.65   |
| LOC_Os10g36860 | 11.270 ± 0.823   | 23.427 ± 2.180   | 0.009 | 0.48   |
| LOC_Os10g37340 | 24.806 ± 1.141   | 7.033 ± 1.256    | 0.000 | 3.53   |
| LOC_Os10g38110 | 31.554 ± 0.677   | 63.458 ± 1.716   | 0.000 | 0.50   |
| LOC_Os10g38229 | 10.026 ± 1.539   | 4.250 ± 0.678    | 0.020 | 2.36   |
| LOC_Os10g38234 | 25.379 ± 3.930   | 11.314 ± 0.849   | 0.032 | 2.24   |
| LOC_Os10g38238 | 21.091 ± 2.931   | 6.121 ± 0.782    | 0.014 | 3.45   |
| LOC_Os10g38272 | 29.612 ± 2.648   | 12.504 ± 1.798   | 0.003 | 2.37   |
| LOC_Os10g38274 | 12.935 ± 2.069   | 4.101 ± 1.025    | 0.013 | 3.15   |
| LOC_Os10g38276 | 14.502 ± 2.763   | 4.775 ± 2.045    | 0.019 | 3.04   |
| LOC_Os10g38470 | 5.256 ± 0.885    | 11.395 ± 1.052   | 0.004 | 0.46   |
| LOC_Os10g38780 | 39.794 ± 1.150   | 89.834 ± 2.946   | 0.000 | 0.44   |
| LOC_Os10g39010 | 11.717 ± 0.678   | 27.235 ± 1.359   | 0.001 | 0.43   |
| LOC_Os10g39140 | 27.640 ± 1.418   | 104.694 ± 4.575  | 0.001 | 0.26   |
| LOC_Os10g39880 | 117.030 ± 14.834 | 22.697 ± 5.950   | 0.006 | 5.16   |
| LOC_Os10g40030 | 16.486 ± 0.864   | 37.482 ± 0.823   | 0.000 | 0.44   |
| LOC_Os10g40130 | 6.225 ± 0.303    | 16.982 ± 1.839   | 0.013 | 0.37   |
| LOC_Os10g40220 | 0.033 ± 0.031    | 10.580 ± 0.960   | 0.004 | 0.00   |
| LOC_Os10g41689 | 24.572 ± 2.268   | 9.466 ± 0.735    | 0.007 | 2.60   |
| LOC_Os10g42030 | 4.424 ± 0.238    | 17.402 ± 2.130   | 0.012 | 0.25   |
| LOC_Os10g42040 | 32.698 ± 2.203   | 131.617 ± 16.623 | 0.013 | 0.25   |
| LOC_Os10g42700 | 7.997 ± 0.064    | 17.809 ± 0.427   | 0.001 | 0.45   |
| LOC_Os10g42960 | 14.805 ± 0.358   | 32.718 ± 0.825   | 0.000 | 0.45   |
| LOC_Os10g43050 | 29.343 ± 0.758   | 61.658 ± 5.939   | 0.015 | 0.48   |
| LOC_Os10g43060 | 14.673 ± 0.179   | 4.832 ± 0.626    | 0.001 | 3.04   |
| LOC_Os11g01890 | 6.286 ± 0.798    | 15.397 ± 1.676   | 0.007 | 0.41   |
| LOC_Os11g02730 | 12.759 ± 0.664   | 4.361 ± 1.826    | 0.014 | 2.93   |
| LOC_Os11g05380 | 10.407 ± 0.287   | 0.025 ± 0.035    | 0.000 | 420.11 |
| LOC_Os11g05552 | 5.940 ± 0.566    | 12.827 ± 1.013   | 0.003 | 0.46   |
| LOC_Os11g05614 | 10.215 ± 0.704   | 2.097 ± 0.657    | 0.000 | 4.87   |
| LOC_Os11g05860 | 112.925 ± 2.089  | 47.903 ± 5.152   | 0.001 | 2.36   |
| LOC_Os11g06020 | 38.874 ± 3.540   | 90.280 ± 1.327   | 0.001 | 0.43   |
| LOC_Os11g06780 | 7.422 ± 0.770    | 17.100 ± 2.761   | 0.031 | 0.43   |
| LOC_Os11g06980 | 3.193 ± 0.173    | 12.312 ± 1.942   | 0.021 | 0.26   |
| LOC_Os11g07670 | 4.565 ± 0.331    | 10.359 ± 0.643   | 0.002 | 0.44   |
| LOC_Os11g07860 | 2.199 ± 0.128    | 11.051 ± 1.075   | 0.007 | 0.20   |
| LOC_Os11g07910 | 6.066 ± 1.259    | 12.463 ± 1.381   | 0.009 | 0.49   |
| LOC_Os11g07930 | 4.179 ± 0.129    | 19.744 ± 0.406   | 0.000 | 0.21   |
| LOC_Os11g07960 | 11.380 ± 0.724   | 33.583 ± 4.536   | 0.018 | 0.34   |
| LOC_Os11g07980 | 23.688 ± 2.115   | 84.050 ± 3.835   | 0.000 | 0.28   |
| LOC_Os11g08300 | 14.474 ± 0.306   | 63.449 ± 4.306   | 0.004 | 0.23   |
| LOC_Os11g09590 | 7.434 ± 0.340    | 18.782 ± 2.193   | 0.016 | 0.40   |
| LOC_Os11g10320 | 132.890 ± 12.375 | 273.528 ± 38.584 | 0.027 | 0.49   |
| LOC_Os11g10470 | 117.450 ± 11.259 | 29.932 ± 7.136   | 0.002 | 3.92   |
| LOC_Os11g10480 | 11.360 ± 1.206   | 4.744 ± 0.949    | 0.004 | 2.39   |

|                |                 |                  |       |       |
|----------------|-----------------|------------------|-------|-------|
| LOC_Os11g10850 | 30.442 ± 7.161  | 83.594 ± 7.615   | 0.002 | 0.36  |
| LOC_Os11g12340 | 1.025 ± 0.042   | 16.781 ± 1.399   | 0.004 | 0.06  |
| LOC_Os11g12590 | 9.674 ± 0.664   | 23.361 ± 0.689   | 0.000 | 0.41  |
| LOC_Os11g13390 | 5.967 ± 0.466   | 26.494 ± 1.517   | 0.001 | 0.23  |
| LOC_Os11g13420 | 4.404 ± 0.984   | 29.233 ± 3.349   | 0.006 | 0.15  |
| LOC_Os11g13680 | 3.598 ± 0.907   | 11.579 ± 0.371   | 0.002 | 0.31  |
| LOC_Os11g16550 | 32.154 ± 1.200  | 6.879 ± 1.149    | 0.000 | 4.67  |
| LOC_Os11g17290 | 25.081 ± 1.013  | 51.124 ± 2.516   | 0.002 | 0.49  |
| LOC_Os11g20310 | 8.999 ± 0.673   | 19.407 ± 2.233   | 0.016 | 0.46  |
| LOC_Os11g25040 | 41.362 ± 3.343  | 13.913 ± 1.846   | 0.002 | 2.97  |
| LOC_Os11g25130 | 7.685 ± 0.395   | 18.719 ± 1.446   | 0.006 | 0.41  |
| LOC_Os11g27730 | 10.999 ± 0.788  | 25.879 ± 1.861   | 0.003 | 0.43  |
| LOC_Os11g28600 | 66.848 ± 2.694  | 149.438 ± 20.499 | 0.028 | 0.45  |
| LOC_Os11g29970 | 4.286 ± 0.102   | 11.959 ± 0.581   | 0.002 | 0.36  |
| LOC_Os11g30200 | 22.319 ± 1.965  | 47.472 ± 4.926   | 0.010 | 0.47  |
| LOC_Os11g30210 | 8.117 ± 0.447   | 18.351 ± 1.320   | 0.004 | 0.44  |
| LOC_Os11g31060 | 79.957 ± 19.940 | 6.323 ± 0.654    | 0.035 | 12.65 |
| LOC_Os11g31530 | 4.476 ± 0.210   | 25.224 ± 2.975   | 0.010 | 0.18  |
| LOC_Os11g32770 | 12.694 ± 2.899  | 1.195 ± 0.406    | 0.028 | 10.63 |
| LOC_Os11g33394 | 7.840 ± 0.623   | 36.558 ± 1.853   | 0.001 | 0.21  |
| LOC_Os11g37230 | 41.578 ± 1.321  | 87.395 ± 3.977   | 0.002 | 0.48  |
| LOC_Os11g37960 | 24.299 ± 2.438  | 4.126 ± 0.914    | 0.003 | 5.89  |
| LOC_Os11g38020 | 8.040 ± 0.517   | 23.386 ± 0.553   | 0.000 | 0.34  |
| LOC_Os11g38210 | 0.366 ± 0.272   | 20.393 ± 4.985   | 0.029 | 0.02  |
| LOC_Os11g38330 | 0.012 ± 0.017   | 29.330 ± 1.405   | 0.001 | 0.00  |
| LOC_Os11g39209 | 6.429 ± 0.575   | 15.631 ± 2.888   | 0.041 | 0.41  |
| LOC_Os11g39310 | 6.113 ± 0.145   | 12.432 ± 0.968   | 0.010 | 0.49  |
| LOC_Os11g39370 | 42.173 ± 2.039  | 109.603 ± 2.088  | 0.000 | 0.38  |
| LOC_Os11g40770 | 0.000 ± 0.000   | 12.693 ± 3.600   | 0.038 | 0.00  |
| LOC_Os11g40930 | 0.000 ± 0.000   | 15.966 ± 1.991   | 0.008 | 0.00  |
| LOC_Os11g40970 | 0.156 ± 0.102   | 41.286 ± 2.396   | 0.002 | 0.00  |
| LOC_Os11g41034 | 0.812 ± 0.098   | 34.208 ± 0.621   | 0.000 | 0.02  |
| LOC_Os11g41910 | 13.892 ± 0.068  | 28.788 ± 0.890   | 0.002 | 0.48  |
| LOC_Os11g42030 | 0.000 ± 0.000   | 11.344 ± 1.691   | 0.011 | 0.00  |
| LOC_Os11g42500 | 11.558 ± 2.688  | 1.122 ± 0.433    | 0.029 | 10.30 |
| LOC_Os11g42970 | 6.242 ± 1.027   | 28.831 ± 6.659   | 0.038 | 0.22  |
| LOC_Os11g43600 | 4.950 ± 0.382   | 11.183 ± 1.112   | 0.009 | 0.44  |
| LOC_Os11g44870 | 31.262 ± 0.545  | 73.462 ± 4.264   | 0.005 | 0.43  |
| LOC_Os11g45840 | 20.440 ± 0.937  | 41.488 ± 1.369   | 0.000 | 0.49  |
| LOC_Os11g45850 | 20.239 ± 1.281  | 44.913 ± 4.683   | 0.013 | 0.45  |
| LOC_Os11g45890 | 11.089 ± 2.104  | 33.819 ± 3.093   | 0.002 | 0.33  |
| LOC_Os11g46810 | 1.714 ± 0.245   | 10.407 ± 0.402   | 0.000 | 0.16  |
| LOC_Os11g47240 | 11.273 ± 1.111  | 30.277 ± 0.102   | 0.002 | 0.37  |
| LOC_Os11g47269 | 4.985 ± 0.819   | 12.783 ± 1.117   | 0.002 | 0.39  |
| LOC_Os11g47460 | 7.542 ± 1.466   | 16.447 ± 2.319   | 0.015 | 0.46  |

|                |                    |                  |       |       |
|----------------|--------------------|------------------|-------|-------|
| LOC_Os11g47870 | 6.136 ± 1.126      | 14.409 ± 1.536   | 0.005 | 0.43  |
| LOC_Os12g01160 | 10.127 ± 0.768     | 22.659 ± 1.332   | 0.001 | 0.45  |
| LOC_Os12g01950 | 4.349 ± 0.551      | 11.595 ± 1.774   | 0.021 | 0.38  |
| LOC_Os12g02040 | 10.209 ± 0.396     | 1.396 ± 0.667    | 0.000 | 7.32  |
| LOC_Os12g02310 | 12.552 ± 1.069     | 0.684 ± 0.503    | 0.001 | 18.34 |
| LOC_Os12g02330 | 150.342 ± 10.856   | 380.720 ± 31.042 | 0.005 | 0.39  |
| LOC_Os12g02960 | 15.839 ± 1.645     | 50.200 ± 2.573   | 0.000 | 0.32  |
| LOC_Os12g02980 | 19.380 ± 1.031     | 6.863 ± 0.754    | 0.000 | 2.82  |
| LOC_Os12g03350 | 20.240 ± 2.451     | 41.022 ± 3.977   | 0.006 | 0.49  |
| LOC_Os12g03370 | 28.129 ± 2.363     | 12.282 ± 0.508   | 0.009 | 2.29  |
| LOC_Os12g03420 | 21.648 ± 0.540     | 51.314 ± 6.537   | 0.023 | 0.42  |
| LOC_Os12g05050 | 30.778 ± 2.542     | 70.752 ± 2.933   | 0.000 | 0.44  |
| LOC_Os12g05260 | 14.459 ± 0.392     | 5.468 ± 1.664    | 0.013 | 2.64  |
| LOC_Os12g06850 | 9.586 ± 0.650      | 22.103 ± 3.973   | 0.044 | 0.43  |
| LOC_Os12g07180 | 0.017 ± 0.024      | 10.928 ± 0.849   | 0.003 | 0.00  |
| LOC_Os12g07210 | 17.983 ± 1.901     | 6.595 ± 0.507    | 0.010 | 2.73  |
| LOC_Os12g07490 | 6.093 ± 1.195      | 13.708 ± 1.327   | 0.004 | 0.44  |
| LOC_Os12g08090 | 36.491 ± 2.113     | 11.606 ± 0.979   | 0.001 | 3.14  |
| LOC_Os12g08130 | 24.784 ± 1.582     | 6.199 ± 1.977    | 0.001 | 4.00  |
| LOC_Os12g08830 | 6.310 ± 0.391      | 14.027 ± 2.091   | 0.031 | 0.45  |
| LOC_Os12g09584 | 5.735 ± 0.830      | 15.620 ± 2.190   | 0.014 | 0.37  |
| LOC_Os12g10184 | 6.083 ± 0.444      | 13.287 ± 0.749   | 0.001 | 0.46  |
| LOC_Os12g10580 | 148.451 ± 6.012    | 28.662 ± 4.753   | 0.000 | 5.18  |
| LOC_Os12g10710 | 1.583 ± 0.186      | 17.609 ± 1.432   | 0.004 | 0.09  |
| LOC_Os12g10740 | 13.503 ± 0.340     | 30.651 ± 0.688   | 0.000 | 0.44  |
| LOC_Os12g11660 | 7.637 ± 0.897      | 25.020 ± 2.412   | 0.005 | 0.31  |
| LOC_Os12g11790 | 0.031 ± 0.044      | 13.201 ± 2.038   | 0.012 | 0.00  |
| LOC_Os12g11830 | 10.269 ± 2.016     | 52.717 ± 1.897   | 0.000 | 0.19  |
| LOC_Os12g12000 | 0.116 ± 0.164      | 32.747 ± 3.189   | 0.005 | 0.00  |
| LOC_Os12g12090 | 0.000 ± 0.000      | 162.834 ± 11.809 | 0.003 | 0.00  |
| LOC_Os12g12110 | 1495.893 ± 200.364 | 461.441 ± 30.428 | 0.016 | 3.24  |
| LOC_Os12g12115 | 0.000 ± 0.000      | 99.122 ± 9.653   | 0.005 | 0.00  |
| LOC_Os12g12120 | 0.105 ± 0.094      | 10.284 ± 0.671   | 0.002 | 0.01  |
| LOC_Os12g12130 | 0.013 ± 0.018      | 14.313 ± 2.358   | 0.013 | 0.00  |
| LOC_Os12g12170 | 6.332 ± 0.578      | 22.979 ± 2.848   | 0.012 | 0.28  |
| LOC_Os12g12560 | 0.941 ± 0.114      | 16.156 ± 1.904   | 0.008 | 0.06  |
| LOC_Os12g12690 | 0.000 ± 0.000      | 17.445 ± 3.564   | 0.020 | 0.00  |
| LOC_Os12g12850 | 95.476 ± 3.345     | 282.857 ± 8.311  | 0.000 | 0.34  |
| LOC_Os12g13290 | 3.687 ± 0.389      | 13.510 ± 1.008   | 0.002 | 0.27  |
| LOC_Os12g13460 | 3.429 ± 0.289      | 13.641 ± 1.118   | 0.004 | 0.25  |
| LOC_Os12g13674 | 0.216 ± 0.132      | 43.230 ± 1.847   | 0.001 | 0.01  |
| LOC_Os12g14540 | 0.000 ± 0.000      | 19.066 ± 1.641   | 0.004 | 0.00  |
| LOC_Os12g14840 | 0.216 ± 0.119      | 14.758 ± 1.050   | 0.002 | 0.01  |
| LOC_Os12g15505 | 0.000 ± 0.000      | 112.377 ± 13.816 | 0.007 | 0.00  |
| LOC_Os12g16200 | 11.248 ± 0.610     | 24.485 ± 0.771   | 0.000 | 0.46  |

|                |                  |                  |       |        |
|----------------|------------------|------------------|-------|--------|
| LOC_Os12g16220 | 4.215 ± 0.534    | 10.382 ± 1.242   | 0.010 | 0.41   |
| LOC_Os12g16240 | 21.027 ± 2.203   | 7.073 ± 0.937    | 0.005 | 2.97   |
| LOC_Os12g16280 | 0.731 ± 0.023    | 18.080 ± 0.473   | 0.000 | 0.04   |
| LOC_Os12g16350 | 4.885 ± 0.370    | 13.153 ± 1.362   | 0.009 | 0.37   |
| LOC_Os12g16520 | 7.855 ± 0.340    | 17.718 ± 0.767   | 0.001 | 0.44   |
| LOC_Os12g16524 | 8.917 ± 0.490    | 24.136 ± 1.866   | 0.005 | 0.37   |
| LOC_Os12g16540 | 9.042 ± 1.645    | 22.053 ± 4.011   | 0.030 | 0.41   |
| LOC_Os12g17120 | 0.091 ± 0.064    | 12.471 ± 3.203   | 0.032 | 0.01   |
| LOC_Os12g18630 | 10.629 ± 0.522   | 23.015 ± 1.561   | 0.004 | 0.46   |
| LOC_Os12g19030 | 4.268 ± 0.280    | 10.073 ± 0.464   | 0.000 | 0.42   |
| LOC_Os12g19580 | 33.874 ± 1.338   | 10.828 ± 2.137   | 0.001 | 3.13   |
| LOC_Os12g20144 | 6.091 ± 0.309    | 12.463 ± 0.968   | 0.007 | 0.49   |
| LOC_Os12g20410 | 10.275 ± 1.168   | 3.728 ± 1.301    | 0.006 | 2.76   |
| LOC_Os12g22810 | 2.824 ± 0.240    | 11.310 ± 1.007   | 0.005 | 0.25   |
| LOC_Os12g22839 | 15.860 ± 1.701   | 75.146 ± 17.203  | 0.038 | 0.21   |
| LOC_Os12g22870 | 12.717 ± 2.590   | 0.054 ± 0.077    | 0.020 | 234.73 |
| LOC_Os12g23150 | 0.750 ± 0.167    | 16.617 ± 2.316   | 0.010 | 0.05   |
| LOC_Os12g23780 | 0.092 ± 0.075    | 14.849 ± 0.774   | 0.001 | 0.01   |
| LOC_Os12g24320 | 24.231 ± 3.540   | 87.529 ± 8.004   | 0.003 | 0.28   |
| LOC_Os12g25160 | 0.000 ± 0.000    | 10.928 ± 1.887   | 0.015 | 0.00   |
| LOC_Os12g25170 | 8.916 ± 1.553    | 20.467 ± 1.131   | 0.002 | 0.44   |
| LOC_Os12g25280 | 0.000 ± 0.000    | 13.043 ± 2.982   | 0.025 | 0.00   |
| LOC_Os12g25800 | 2.427 ± 0.984    | 10.237 ± 0.619   | 0.002 | 0.24   |
| LOC_Os12g27220 | 147.994 ± 5.587  | 0.506 ± 0.244    | 0.001 | 292.44 |
| LOC_Os12g27254 | 28.985 ± 0.885   | 0.202 ± 0.083    | 0.000 | 143.73 |
| LOC_Os12g29330 | 20.463 ± 1.491   | 46.874 ± 4.155   | 0.007 | 0.44   |
| LOC_Os12g29400 | 12.745 ± 2.594   | 3.410 ± 0.195    | 0.036 | 3.74   |
| LOC_Os12g29950 | 13.514 ± 1.345   | 30.048 ± 3.506   | 0.013 | 0.45   |
| LOC_Os12g31460 | 30.289 ± 2.275   | 61.431 ± 6.239   | 0.012 | 0.49   |
| LOC_Os12g32610 | 21.550 ± 5.968   | 1.394 ± 0.532    | 0.040 | 15.46  |
| LOC_Os12g33130 | 54.277 ± 0.550   | 126.239 ± 3.644  | 0.001 | 0.43   |
| LOC_Os12g33922 | 4.834 ± 1.730    | 10.084 ± 0.672   | 0.037 | 0.48   |
| LOC_Os12g34500 | 28.051 ± 4.517   | 13.633 ± 1.194   | 0.038 | 2.06   |
| LOC_Os12g34510 | 17.895 ± 1.177   | 6.187 ± 1.882    | 0.003 | 2.89   |
| LOC_Os12g35630 | 47.504 ± 3.252   | 111.149 ± 4.579  | 0.000 | 0.43   |
| LOC_Os12g35890 | 4.318 ± 0.474    | 10.594 ± 1.985   | 0.040 | 0.41   |
| LOC_Os12g36210 | 24.621 ± 2.023   | 0.168 ± 0.238    | 0.003 | 146.42 |
| LOC_Os12g36830 | 54.016 ± 2.908   | 151.012 ± 9.560  | 0.003 | 0.36   |
| LOC_Os12g36850 | 18.984 ± 0.902   | 70.459 ± 3.428   | 0.001 | 0.27   |
| LOC_Os12g36860 | 6.204 ± 1.304    | 27.493 ± 1.128   | 0.000 | 0.23   |
| LOC_Os12g36880 | 74.200 ± 5.188   | 252.485 ± 30.701 | 0.013 | 0.29   |
| LOC_Os12g36910 | 10.317 ± 0.676   | 5.009 ± 0.633    | 0.001 | 2.06   |
| LOC_Os12g37260 | 663.737 ± 36.570 | 33.447 ± 1.129   | 0.002 | 19.84  |
| LOC_Os12g37350 | 53.549 ± 1.585   | 5.939 ± 0.655    | 0.000 | 9.02   |
| LOC_Os12g37415 | 53.380 ± 12.754  | 128.847 ± 15.742 | 0.007 | 0.41   |

|                        |                    |                    |       |      |
|------------------------|--------------------|--------------------|-------|------|
| LOC_Os12g38490         | 23.514 ± 0.630     | 47.637 ± 0.797     | 0.000 | 0.49 |
| LOC_Os12g38660         | 15.670 ± 1.330     | 42.029 ± 4.958     | 0.013 | 0.37 |
| LOC_Os12g38720         | 22.024 ± 1.458     | 46.270 ± 1.488     | 0.000 | 0.48 |
| LOC_Os12g39120         | 5.225 ± 0.498      | 12.054 ± 1.451     | 0.014 | 0.43 |
| LOC_Os12g39370         | 19.889 ± 0.310     | 40.288 ± 2.654     | 0.008 | 0.49 |
| LOC_Os12g39770         | 1.559 ± 0.600      | 24.542 ± 2.987     | 0.007 | 0.06 |
| LOC_Os12g40180         | 18.512 ± 5.516     | 2.658 ± 1.502      | 0.047 | 6.96 |
| LOC_Os12g41560         | 2.391 ± 0.203      | 22.692 ± 4.408     | 0.023 | 0.11 |
| LOC_Os12g42150         | 6.395 ± 0.510      | 13.401 ± 1.491     | 0.014 | 0.48 |
| LOC_Os12g42220         | 6.148 ± 0.296      | 17.988 ± 1.850     | 0.010 | 0.34 |
| LOC_Os12g42876         | 14.887 ± 0.936     | 35.327 ± 0.258     | 0.000 | 0.42 |
| LOC_Os12g43410         | 16.478 ± 0.735     | 51.675 ± 9.914     | 0.037 | 0.32 |
| LOC_Os12g43440         | 5.886 ± 1.323      | 21.028 ± 3.046     | 0.010 | 0.28 |
| LOC_Os12g43550         | 5.113 ± 0.152      | 11.863 ± 0.859     | 0.007 | 0.43 |
| LOC_Os12g43600         | 2562.011 ± 370.410 | 6951.678 ± 313.125 | 0.000 | 0.37 |
| LOC_Os12g43640         | 2.618 ± 0.057      | 11.829 ± 0.359     | 0.001 | 0.22 |
| LOC_Os12g43810         | 4.775 ± 0.675      | 13.003 ± 2.496     | 0.036 | 0.37 |
| LOC_Os12g43880         | 10.887 ± 0.983     | 31.639 ± 4.453     | 0.018 | 0.34 |
| ChrSy.fgenes.h.gene.14 | 54.749 ± 2.238     | 197.501 ± 3.229    | 0.000 | 0.28 |
