# Supplementary material for: Integrative Analysis of the microRNAome and Transcriptome Illuminates the Response of Susceptible Rice Plants to Rice Stripe Virus
Source: PubMed Central journal article supplement (PMC4723043; doi:10.1371/journal.pone.0146946), 2016-01-22
Supplement: pone.0146946.s006.pdf [file pone.0146946.s006.pdf]

**S6 Table.** The miRNAs negatively correlated with their target genes

| miRNAs         |         | Genes          |         |                                                            |
|----------------|---------|----------------|---------|------------------------------------------------------------|
| Name           | up/down | ID             | up/down | Description                                                |
| osa-miR1320-3p | up      | LOC_Os11g47240 | down    | Probable LRR receptor-like serine/threonine-protein kinase |
| osa-miR1320-3p | up      | LOC_Os12g23150 | down    | 4-nitrophenylphosphatase                                   |
| osa-miR1320-5p | up      | LOC_Os01g71340 | down    | Glucan endo-1,3-beta-glucosidase, acidic isoform           |
| osa-miR1423-5p | up      | LOC_Os10g20310 | down    | Uncharacterized protein                                    |
| osa-miR1423-5p | up      | LOC_Os10g36260 | down    | Uncharacterized protein                                    |
| osa-miR1423-5p | up      | LOC_Os10g35140 | down    | Uncharacterized transporter sll0355                        |
| osa-miR1423-5p | up      | LOC_Os07g39780 | down    | SUMO-activating enzyme subunit 2                           |
| osa-miR1423-5p | up      | LOC_Os04g43710 | down    | Phosphoenolpyruvate carboxylase kinase 2                   |
| osa-miR1423-5p | up      | LOC_Os02g37090 | down    | Protein PHYLLLO, chloroplastic                             |
| osa-miR1423-5p | up      | LOC_Os02g37090 | down    | Protein PHYLLLO, chloroplastic                             |
| osa-miR1423-5p | up      | LOC_Os01g47450 | down    | Carboxyl-terminal-processing protease                      |
| osa-miR1423-5p | up      | LOC_Os06g34400 | down    | RING-H2 finger protein ATL57                               |
| osa-miR1423-5p | up      | LOC_Os05g35980 | down    | Uncharacterized protein                                    |
| osa-miR1423-5p | up      | LOC_Os06g38450 | down    | Vignain                                                    |
| osa-miR1423-5p | up      | LOC_Os09g19280 | down    | Disease resistance protein RPM1                            |
| osa-miR1425-3p | up      | LOC_Os07g03040 | down    | Putative uncharacterized protein                           |
| osa-miR1425-3p | up      | LOC_Os01g49830 | down    | AP2/ERF domain-containing protein                          |
| osa-miR1425-3p | up      | LOC_Os11g45890 | down    | Uncharacterized protein                                    |
| osa-miR1429-5p | up      | LOC_Os07g35680 | down    | Cysteine-rich receptor-like protein kinase 8               |
| osa-miR1429-5p | up      | LOC_Os11g45890 | down    | Uncharacterized protein                                    |
| osa-miR1432-3p | up      | LOC_Os02g42160 | down    | Wall-associated receptor kinase-like 1                     |
| osa-miR1432-3p | up      | LOC_Os07g35680 | down    | Cysteine-rich receptor-like protein kinase 8               |
| osa-miR1432-5p | up      | LOC_Os12g39120 | down    | Probable protein phosphatase 2C 78                         |
| osa-miR1432-5p | up      | LOC_Os02g57280 | down    | Brown planthopper-induced resistance protein 6             |

|                |      |                |      |                                                                    |
|----------------|------|----------------|------|--------------------------------------------------------------------|
| osa-miR1432-5p | up   | LOC_Os12g16200 | down | Glutathione synthetase, chloroplastic                              |
| osa-miR1432-5p | up   | LOC_Os06g02500 | down | Superoxide dismutase [Fe], chloroplastic (Fragment)                |
| osa-miR156a    | down | LOC_Os08g07080 | up   | Zingiberene synthase                                               |
| osa-miR156a    | down | LOC_Os01g01660 | up   | Isoflavone reductase homolog IRL                                   |
| osa-miR156a    | down | LOC_Os10g25230 | up   | ZIM domain containing protein, putative, expressed                 |
| osa-miR156c-3p | up   | LOC_Os01g02400 | down | Probable receptor-like protein kinase                              |
| osa-miR156c-3p | up   | LOC_Os10g04720 | down | G-type lectin S-receptor-like serine/threonine-protein kinase B120 |
| osa-miR156c-3p | up   | LOC_Os12g14540 | down | Uncharacterized protein                                            |
| osa-miR156d    | down | LOC_Os08g07080 | up   | Zingiberene synthase                                               |
| osa-miR156d    | down | LOC_Os01g01660 | up   | Isoflavone reductase homolog IRL                                   |
| osa-miR156d    | down | LOC_Os10g25230 | up   | ZIM domain containing protein, putative, expressed                 |
| osa-miR156e    | down | LOC_Os08g07080 | up   | Zingiberene synthase                                               |
| osa-miR156e    | down | LOC_Os01g01660 | up   | Isoflavone reductase homolog IRL                                   |
| osa-miR156e    | down | LOC_Os10g25230 | up   | ZIM domain containing protein, putative, expressed                 |
| osa-miR156f-5p | down | LOC_Os08g07080 | up   | Zingiberene synthase                                               |
| osa-miR156f-5p | down | LOC_Os01g01660 | up   | Isoflavone reductase homolog IRL                                   |
| osa-miR156f-5p | down | LOC_Os10g25230 | up   | ZIM domain containing protein, putative, expressed                 |
| osa-miR156g-3p | up   | LOC_Os01g02400 | down | Probable receptor-like protein kinase                              |
| osa-miR156g-3p | up   | LOC_Os10g04720 | down | G-type lectin S-receptor-like serine/threonine-protein kinase B120 |
| osa-miR156g-3p | up   | LOC_Os12g14540 | down | Uncharacterized protein                                            |
| osa-miR156h-5p | down | LOC_Os08g07080 | up   | Zingiberene synthase                                               |
| osa-miR156h-5p | down | LOC_Os01g01660 | up   | Isoflavone reductase homolog IRL                                   |
| osa-miR156h-5p | down | LOC_Os10g25230 | up   | ZIM domain containing protein, putative, expressed                 |
| osa-miR156i    | down | LOC_Os08g07080 | up   | Zingiberene synthase                                               |
| osa-miR156i    | down | LOC_Os01g01660 | up   | Isoflavone reductase homolog IRL                                   |
| osa-miR156i    | down | LOC_Os10g25230 | up   | ZIM domain containing protein, putative, expressed                 |
| osa-miR156j-3p | up   | LOC_Os02g38170 | down | Uncharacterized protein                                            |

|                |      |                |      |                                                                   |
|----------------|------|----------------|------|-------------------------------------------------------------------|
| osa-miR156j-3p | up   | LOC_Os02g38170 | down | Uncharacterized protein                                           |
| osa-miR156j-3p | up   | LOC_Os02g40180 | down | Probable LRR receptor-like serine/threonine-protein kinase        |
| osa-miR156j-5p | down | LOC_Os08g07080 | up   | Zingiberene synthase                                              |
| osa-miR156j-5p | down | LOC_Os01g01660 | up   | Isoflavone reductase homolog IRL                                  |
| osa-miR156j-5p | down | LOC_Os10g25230 | up   | ZIM domain containing protein, putative, expressed                |
| osa-miR156k    | down | LOC_Os08g07080 | up   | Zingiberene synthase                                              |
| osa-miR156k    | down | LOC_Os01g01660 | up   | Isoflavone reductase homolog IRL                                  |
| osa-miR156k    | down | LOC_Os10g25230 | up   | ZIM domain containing protein, putative, expressed                |
| osa-miR159a.1  | up   | LOC_Os11g07910 | down | Transmembrane 9 superfamily member 3                              |
| osa-miR159a.1  | up   | LOC_Os04g40420 | down | SWI/SNF complex subunit SWI3A                                     |
| osa-miR159a.1  | up   | LOC_Os07g30020 | down | Multiple C2 and transmembrane domain-containing protein 1         |
| osa-miR159a.1  | up   | LOC_Os10g04730 | down | Cysteine-rich receptor-like protein kinase 5                      |
| osa-miR159a.1  | up   | LOC_Os11g27730 | down | indole-2-monooxygenase                                            |
| osa-miR159a.1  | up   | LOC_Os11g40970 | down | Probable LRR receptor-like serine/threonine-protein kinase        |
| osa-miR159a.1  | up   | LOC_Os11g40930 | down | Uncharacterized protein                                           |
| osa-miR159a.2  | up   | LOC_Os01g71340 | down | Glucan endo-1,3-beta-glucosidase, acidic isoform                  |
| osa-miR159a.2  | up   | LOC_Os01g02700 | down | Probable receptor-like protein kinase                             |
| osa-miR159a.2  | up   | LOC_Os01g02400 | down | Probable receptor-like protein kinase                             |
| osa-miR159a.2  | up   | LOC_Os09g13570 | down | CPuORF2 - conserved peptide uORF-containing transcript, expressed |
| osa-miR159a.2  | up   | LOC_Os08g44640 | down | Serine carboxypeptidase-like 51                                   |
| osa-miR159a.2  | up   | LOC_Os03g46070 | down | Zeamatin                                                          |
| osa-miR159a.2  | up   | LOC_Os02g17710 | down | Probable leucine-rich repeat receptor-like protein kinase         |
| osa-miR159a.2  | up   | LOC_Os07g11280 | down | Pentatricopeptide repeat-containing protein                       |
| osa-miR159a.2  | up   | LOC_Os07g33480 | down | Cytochrome P450 716B1                                             |
| osa-miR159a.2  | up   | LOC_Os04g45710 | down | Uncharacterized protein                                           |
| osa-miR159a.2  | up   | LOC_Os11g06020 | down | BEL1-like homeodomain protein 1                                   |
| osa-miR159a.2  | up   | LOC_Os06g05050 | down | Wall-associated receptor kinase 3                                 |

|               |    |                |      |                                                            |
|---------------|----|----------------|------|------------------------------------------------------------|
| osa-miR159a.2 | up | LOC_Os03g24930 | down | Probable receptor-like protein kinase                      |
| osa-miR159a.2 | up | LOC_Os01g70710 | down | heavy metal-associated domain containing protein           |
| osa-miR159a.2 | up | LOC_Os11g07980 | down | Ankyrin repeat domain-containing protein 6                 |
| osa-miR159a.2 | up | LOC_Os02g03960 | down | Ocs element-binding factor 1                               |
| osa-miR159a.2 | up | LOC_Os07g13530 | down | Ras-related protein RABE1c                                 |
| osa-miR159a.2 | up | LOC_Os08g01240 | down | Uncharacterized protein                                    |
| osa-miR159a.2 | up | LOC_Os07g05840 | down | Uncharacterized protein                                    |
| osa-miR159a.2 | up | LOC_Os12g14840 | down | Uncharacterized protein                                    |
| osa-miR159a.2 | up | LOC_Os04g24804 | down | Uncharacterized protein                                    |
| osa-miR159a.2 | up | LOC_Os11g40970 | down | Probable LRR receptor-like serine/threonine-protein kinase |
| osa-miR159b   | up | LOC_Os11g07910 | down | Transmembrane 9 superfamily member 3                       |
| osa-miR159b   | up | LOC_Os04g40420 | down | SWI/SNF complex subunit SWI3A                              |
| osa-miR159b   | up | LOC_Os07g30020 | down | Multiple C2 and transmembrane domain-containing protein 1  |
| osa-miR159b   | up | LOC_Os10g04730 | down | Cysteine-rich receptor-like protein kinase 5               |
| osa-miR159b   | up | LOC_Os11g27730 | down | indole-2-monooxygenase                                     |
| osa-miR159b   | up | LOC_Os11g40970 | down | Probable LRR receptor-like serine/threonine-protein kinase |
| osa-miR159b   | up | LOC_Os11g40930 | down | Uncharacterized protein                                    |
| osa-miR159d   | up | LOC_Os11g07910 | down | Transmembrane 9 superfamily member 3                       |
| osa-miR159d   | up | LOC_Os04g40420 | down | SWI/SNF complex subunit SWI3A                              |
| osa-miR159d   | up | LOC_Os03g27830 | down | Uncharacterized protein                                    |
| osa-miR159d   | up | LOC_Os09g29520 | down | Wall-associated receptor kinase 3                          |
| osa-miR159d   | up | LOC_Os07g30020 | down | Multiple C2 and transmembrane domain-containing protein 1  |
| osa-miR159d   | up | LOC_Os10g04730 | down | Cysteine-rich receptor-like protein kinase 5               |
| osa-miR159d   | up | LOC_Os11g27730 | down | indole-2-monooxygenase                                     |
| osa-miR159d   | up | LOC_Os11g40970 | down | Probable LRR receptor-like serine/threonine-protein kinase |
| osa-miR159d   | up | LOC_Os06g21740 | down | Transposon Ty3-G Gag-Pol polyprotein                       |
| osa-miR159d   | up | LOC_Os11g40930 | down | Uncharacterized protein                                    |

|                |    |                |      |                                                             |
|----------------|----|----------------|------|-------------------------------------------------------------|
| osa-miR159e    | up | LOC_Os11g07910 | down | Transmembrane 9 superfamily member 3                        |
| osa-miR159e    | up | LOC_Os04g40420 | down | SWI/SNF complex subunit SWI3A                               |
| osa-miR159e    | up | LOC_Os03g27830 | down | Uncharacterized protein                                     |
| osa-miR159e    | up | LOC_Os09g29520 | down | Wall-associated receptor kinase 3                           |
| osa-miR159e    | up | LOC_Os07g30020 | down | Multiple C2 and transmembrane domain-containing protein 1   |
| osa-miR159e    | up | LOC_Os10g04730 | down | Cysteine-rich receptor-like protein kinase 5                |
| osa-miR159e    | up | LOC_Os11g27730 | down | indole-2-monooxygenase                                      |
| osa-miR159e    | up | LOC_Os11g40970 | down | Probable LRR receptor-like serine/threonine-protein kinase  |
| osa-miR159e    | up | LOC_Os11g40930 | down | Uncharacterized protein                                     |
| osa-miR160a-3p | up | LOC_Os10g20310 | down | Uncharacterized protein                                     |
| osa-miR160a-3p | up | LOC_Os04g40420 | down | SWI/SNF complex subunit SWI3A                               |
| osa-miR160a-3p | up | LOC_Os12g01950 | down | Uncharacterized protein                                     |
| osa-miR160a-3p | up | LOC_Os06g15330 | down | Zinc finger protein CONSTANS-LIKE 16                        |
| osa-miR160b-3p | up | LOC_Os10g20310 | down | Uncharacterized protein                                     |
| osa-miR160b-3p | up | LOC_Os04g40420 | down | SWI/SNF complex subunit SWI3A                               |
| osa-miR160b-3p | up | LOC_Os12g01950 | down | Uncharacterized protein                                     |
| osa-miR160b-3p | up | LOC_Os06g15330 | down | Zinc finger protein CONSTANS-LIKE 16                        |
| osa-miR160c-3p | up | LOC_Os10g20310 | down | Uncharacterized protein                                     |
| osa-miR160c-3p | up | LOC_Os12g01950 | down | Uncharacterized protein                                     |
| osa-miR160c-3p | up | LOC_Os06g15330 | down | Zinc finger protein CONSTANS-LIKE 16                        |
| osa-miR160d-3p | up | LOC_Os11g06020 | down | BEL1-like homeodomain protein 1                             |
| osa-miR160d-3p | up | LOC_Os11g45890 | down | Uncharacterized protein                                     |
| osa-miR160d-3p | up | LOC_Os09g17329 | down | Retrovirus-related Pol polyprotein from transposon TNT 1-94 |
| osa-miR164a    | up | LOC_Os05g26990 | down | Phospholipid-transporting ATPase 2                          |
| osa-miR164a    | up | LOC_Os07g42450 | down | 40S ribosomal protein SA                                    |
| osa-miR164a    | up | LOC_Os03g64140 | down | Uncharacterized protein                                     |
| osa-miR164a    | up | LOC_Os01g45530 | down | Single-stranded DNA-binding protein, mitochondrial          |

|             |    |                |      |                                                                       |
|-------------|----|----------------|------|-----------------------------------------------------------------------|
| osa-miR164a | up | LOC_Os04g37619 | down | Zeaxanthin epoxidase, chloroplastic                                   |
| osa-miR164a | up | LOC_Os06g38340 | down | Probable LRR receptor-like serine/threonine-protein kinase            |
| osa-miR164a | up | LOC_Os02g38160 | down | Beta-1,4-mannosyl-glycoprotein 4-beta-N-acetylglucosaminyltransferase |
| osa-miR164a | up | LOC_Os07g48510 | down | Thioredoxin-like 1-1, chloroplastic                                   |
| osa-miR164a | up | LOC_Os12g43410 | down | Thaumatococcus-like protein                                           |
| osa-miR164a | up | LOC_Os02g57280 | down | Brown planthopper-induced resistance protein 5                        |
| osa-miR164a | up | LOC_Os05g38880 | down | Uncharacterized protein                                               |
| osa-miR164a | up | LOC_Os01g70460 | down | Uncharacterized protein                                               |
| osa-miR164a | up | LOC_Os01g09252 | down | Zinc finger CCCH domain-containing protein 17 (abiotic stresses)      |
| osa-miR164a | up | LOC_Os11g40970 | down | Probable LRR receptor-like serine/threonine-protein kinase            |
| osa-miR164b | up | LOC_Os05g26990 | down | Phospholipid-transporting ATPase 2                                    |
| osa-miR164b | up | LOC_Os07g42450 | down | 40S ribosomal protein SA                                              |
| osa-miR164b | up | LOC_Os03g64140 | down | Uncharacterized protein                                               |
| osa-miR164b | up | LOC_Os01g45530 | down | Single-stranded DNA-binding protein, mitochondrial                    |
| osa-miR164b | up | LOC_Os04g37619 | down | Zeaxanthin epoxidase, chloroplastic                                   |
| osa-miR164b | up | LOC_Os06g38340 | down | Probable LRR receptor-like serine/threonine-protein kinase            |
| osa-miR164b | up | LOC_Os02g38160 | down | Beta-1,4-mannosyl-glycoprotein 4-beta-N-acetylglucosaminyltransferase |
| osa-miR164b | up | LOC_Os07g48510 | down | Thioredoxin-like 1-1, chloroplastic                                   |
| osa-miR164b | up | LOC_Os12g43410 | down | Thaumatococcus-like protein                                           |
| osa-miR164b | up | LOC_Os02g57280 | down | Brown planthopper-induced resistance protein 4                        |
| osa-miR164b | up | LOC_Os05g38880 | down | Uncharacterized protein                                               |
| osa-miR164b | up | LOC_Os01g70460 | down | Uncharacterized protein                                               |
| osa-miR164b | up | LOC_Os11g40970 | down | Probable LRR receptor-like serine/threonine-protein kinase            |
| osa-miR164f | up | LOC_Os05g26990 | down | Phospholipid-transporting ATPase 2                                    |
| osa-miR164f | up | LOC_Os07g42450 | down | 40S ribosomal protein SA                                              |
| osa-miR164f | up | LOC_Os03g64140 | down | Uncharacterized protein                                               |
| osa-miR164f | up | LOC_Os01g45530 | down | Single-stranded DNA-binding protein, mitochondrial                    |

|                |      |                |      |                                                                       |
|----------------|------|----------------|------|-----------------------------------------------------------------------|
| osa-miR164f    | up   | LOC_Os04g37619 | down | Zeaxanthin epoxidase, chloroplastic                                   |
| osa-miR164f    | up   | LOC_Os06g38340 | down | Probable LRR receptor-like serine/threonine-protein kinase            |
| osa-miR164f    | up   | LOC_Os02g38160 | down | Beta-1,4-mannosyl-glycoprotein 4-beta-N-acetylglucosaminyltransferase |
| osa-miR164f    | up   | LOC_Os07g48510 | down | Thioredoxin-like 1-1, chloroplastic                                   |
| osa-miR164f    | up   | LOC_Os12g43410 | down | Thaumatococcus-like protein                                           |
| osa-miR164f    | up   | LOC_Os02g57280 | down | Brown planthopper-induced resistance protein 3                        |
| osa-miR164f    | up   | LOC_Os05g38880 | down | Uncharacterized protein                                               |
| osa-miR164f    | up   | LOC_Os01g70460 | down | Uncharacterized protein                                               |
| osa-miR164f    | up   | LOC_Os11g40970 | down | Probable LRR receptor-like serine/threonine-protein kinase            |
| osa-miR166b-5p | up   | LOC_Os01g07590 | down | universal stress protein domain containing protein                    |
| osa-miR166b-5p | up   | LOC_Os11g07910 | down | Transmembrane 9 superfamily member 3                                  |
| osa-miR166b-5p | up   | LOC_Os01g74540 | down | GATA zinc finger domain containing protein                            |
| osa-miR166b-5p | up   | LOC_Os01g42790 | down | Zingipain-2                                                           |
| osa-miR166b-5p | up   | LOC_Os08g37700 | down | 33 kDa ribonucleoprotein, chloroplastic                               |
| osa-miR166b-5p | up   | LOC_Os03g52640 | down | Uncharacterized protein                                               |
| osa-miR166d-5p | up   | LOC_Os01g07590 | down | universal stress protein domain containing protein                    |
| osa-miR166d-5p | up   | LOC_Os01g74540 | down | GATA zinc finger domain containing protein                            |
| osa-miR166d-5p | up   | LOC_Os01g42790 | down | Zingipain-2                                                           |
| osa-miR166d-5p | up   | LOC_Os08g37700 | down | 33 kDa ribonucleoprotein, chloroplastic                               |
| osa-miR166d-5p | up   | LOC_Os03g52640 | down | Uncharacterized protein                                               |
| osa-miR167a-3p | up   | LOC_Os01g71720 | down | Amino-acid permease BAT1                                              |
| osa-miR167a-3p | up   | LOC_Os03g40550 | down | Fructokinase-2                                                        |
| osa-miR167a-3p | up   | LOC_Os09g04290 | down | Uncharacterized protein                                               |
| osa-miR167a-3p | up   | LOC_Os08g32930 | down | Putative ribonuclease H protein                                       |
| osa-miR167a-3p | up   | LOC_Os01g71630 | down | Uncharacterized protein                                               |
| osa-miR167a-5p | down | LOC_Os04g31040 | up   | Violaxanthin de-epoxidase, chloroplastic                              |
| osa-miR167a-5p | down | LOC_Os03g18740 | up   | Sex determination protein tasselseed-2                                |

|                |      |                |      |                                                                        |
|----------------|------|----------------|------|------------------------------------------------------------------------|
| osa-miR167a-5p | down | LOC_Os06g03930 | up   | Cytochrome P450 704C1                                                  |
| osa-miR167a-5p | down | LOC_Os03g10950 | up   | Probable protein phosphatase 2C 29                                     |
| osa-miR167a-5p | down | LOC_Os01g38180 | up   | Peptidyl-prolyl cis-trans isomerase FKBP62                             |
| osa-miR167a-5p | down | LOC_Os04g45460 | up   | Cysteine-rich repeat secretory protein 15                              |
| osa-miR167c-5p | down | LOC_Os04g31040 | up   | Violaxanthin de-epoxidase, chloroplastic                               |
| osa-miR167c-5p | down | LOC_Os03g18740 | up   | Sex determination protein tasselseed-2                                 |
| osa-miR167c-5p | down | LOC_Os06g03930 | up   | Cytochrome P450 704C1                                                  |
| osa-miR167c-5p | down | LOC_Os03g10950 | up   | Probable protein phosphatase 2C 29                                     |
| osa-miR167c-5p | down | LOC_Os04g45460 | up   | Cysteine-rich repeat secretory protein 15                              |
| osa-miR167e-3p | up   | LOC_Os02g03330 | down | Uncharacterized protein                                                |
| osa-miR167e-3p | up   | LOC_Os01g50930 | down | Uncharacterized protein                                                |
| osa-miR167e-3p | up   | LOC_Os03g52460 | down | Glucose-1-phosphate adenylyltransferase large subunit 1, chloroplastic |
| osa-miR167e-3p | up   | LOC_Os07g11280 | down | Pentatricopeptide repeat-containing protein                            |
| osa-miR167e-3p | up   | LOC_Os04g45710 | down | Uncharacterized protein                                                |
| osa-miR167e-3p | up   | LOC_Os08g32930 | down | Putative ribonuclease H protein                                        |
| osa-miR167e-5p | down | LOC_Os04g31040 | up   | Violaxanthin de-epoxidase, chloroplastic                               |
| osa-miR167e-5p | down | LOC_Os03g18740 | up   | Sex determination protein tasselseed-2                                 |
| osa-miR167e-5p | down | LOC_Os06g03930 | up   | Cytochrome P450 704C1                                                  |
| osa-miR167e-5p | down | LOC_Os03g10950 | up   | Probable protein phosphatase 2C 29                                     |
| osa-miR167e-5p | down | LOC_Os04g45460 | up   | Cysteine-rich repeat secretory protein 15                              |
| osa-miR167h-3p | up   | LOC_Os12g08830 | down | PsbP domain-containing protein 4, chloroplastic                        |
| osa-miR167h-3p | up   | LOC_Os06g22440 | down | Jasmonate O-methyltransferase                                          |
| osa-miR167h-3p | up   | LOC_Os08g25050 | down | Uncharacterized protein                                                |
| osa-miR167h-3p | up   | LOC_Os11g27730 | down | indole-2-monooxygenase                                                 |
| osa-miR167i-3p | up   | LOC_Os02g03330 | down | Uncharacterized protein                                                |
| osa-miR167i-3p | up   | LOC_Os01g50930 | down | Uncharacterized protein                                                |
| osa-miR167i-3p | up   | LOC_Os03g52460 | down | Glucose-1-phosphate adenylyltransferase large subunit 1, chloroplastic |



|                |      |                |      |                                                          |
|----------------|------|----------------|------|----------------------------------------------------------|
| osa-miR167i-3p | up   | LOC_Os07g11280 | down | Pentatricopeptide repeat-containing protein              |
| osa-miR167i-3p | up   | LOC_Os04g45710 | down | Uncharacterized protein                                  |
| osa-miR167i-3p | up   | LOC_Os08g32930 | down | Putative ribonuclease H protein                          |
| osa-miR167i-5p | down | LOC_Os04g31040 | up   | Violaxanthin de-epoxidase, chloroplastic                 |
| osa-miR167i-5p | down | LOC_Os03g18740 | up   | Sex determination protein tasselseed-2                   |
| osa-miR167i-5p | down | LOC_Os06g03930 | up   | Cytochrome P450 704C1                                    |
| osa-miR167i-5p | down | LOC_Os03g10950 | up   | Probable protein phosphatase 2C 29                       |
| osa-miR167i-5p | down | LOC_Os04g45460 | up   | Cysteine-rich repeat secretory protein 15                |
| osa-miR171c-3p | up   | LOC_Os03g59774 | down | Uncharacterized protein                                  |
| osa-miR171c-3p | up   | LOC_Os06g15330 | down | Zinc finger protein CONSTANS-LIKE 16                     |
| osa-miR171c-3p | up   | LOC_Os06g15330 | down | Zinc finger protein CONSTANS-LIKE 16                     |
| osa-miR171c-3p | up   | LOC_Os09g16950 | down | L-type lectin-domain containing receptor kinase IX.1     |
| osa-miR171c-3p | up   | LOC_Os12g29330 | down | NAC domain-containing protein 29                         |
| osa-miR171c-3p | up   | LOC_Os12g43640 | down | Receptor-like protein kinase HAIKU2                      |
| osa-miR171c-3p | up   | LOC_Os01g48950 | down | Uncharacterized protein                                  |
| osa-miR171c-3p | up   | LOC_Os03g52640 | down | Uncharacterized protein                                  |
| osa-miR172c    | up   | LOC_Os12g16540 | down | Wall-associated receptor kinase 3                        |
| osa-miR172c    | up   | LOC_Os01g50930 | down | Uncharacterized protein                                  |
| osa-miR172c    | up   | LOC_Os01g44980 | down | Peptide deformylase 1B, chloroplastic                    |
| osa-miR172c    | up   | LOC_Os01g53020 | down | heat shock protein DnaJ                                  |
| osa-miR172c    | up   | LOC_Os05g21180 | down | Phosphatidylinositol:ceramide inositolphosphotransferase |
| osa-miR172c    | up   | LOC_Os06g34450 | down | E3 ubiquitin-protein ligase                              |
| osa-miR172c    | up   | LOC_Os12g39120 | down | Probable protein phosphatase 2C 78                       |
| osa-miR172c    | up   | LOC_Os09g27734 | down | Uncharacterized protein                                  |
| osa-miR172c    | up   | LOC_Os06g40640 | down | Fructose-bisphosphate aldolase, cytoplasmic isozyme 1    |
| osa-miR172c    | up   | LOC_Os11g42030 | down | Uncharacterized protein                                  |
| osa-miR172d-3p | up   | LOC_Os12g16540 | down | Wall-associated receptor kinase 3                        |

|                |      |                |      |                                                          |
|----------------|------|----------------|------|----------------------------------------------------------|
| osa-miR172d-3p | up   | LOC_Os01g50930 | down | Uncharacterized protein                                  |
| osa-miR172d-3p | up   | LOC_Os01g44980 | down | Peptide deformylase 1B, chloroplastic                    |
| osa-miR172d-3p | up   | LOC_Os01g53020 | down | heat shock protein DnaJ                                  |
| osa-miR172d-3p | up   | LOC_Os05g21180 | down | Phosphatidylinositol:ceramide inositolphosphotransferase |
| osa-miR172d-3p | up   | LOC_Os06g34450 | down | E3 ubiquitin-protein ligase                              |
| osa-miR172d-3p | up   | LOC_Os12g39120 | down | Probable protein phosphatase 2C 78                       |
| osa-miR172d-3p | up   | LOC_Os02g57280 | down | Brown planthopper-induced resistance protein 2           |
| osa-miR172d-3p | up   | LOC_Os07g08340 | down | Pyruvate kinase isozyme A, chloroplastic                 |
| osa-miR172d-3p | up   | LOC_Os09g27734 | down | Uncharacterized protein                                  |
| osa-miR172d-3p | up   | LOC_Os06g40640 | down | Fructose-bisphosphate aldolase, cytoplasmic isozyme 1    |
| osa-miR172d-3p | up   | LOC_Os11g42030 | down | Uncharacterized protein                                  |
| osa-miR172d-5p | up   | LOC_Os02g50470 | down | Uncharacterized protein                                  |
| osa-miR172d-5p | up   | LOC_Os12g14840 | down | Uncharacterized protein                                  |
| osa-miR1861h   | up   | LOC_Os03g32160 | down | calmodulin binding protein                               |
| osa-miR1861h   | up   | LOC_Os04g43770 | down | Uncharacterized protein                                  |
| osa-miR1861h   | up   | LOC_Os11g13420 | down | RNA binding protein                                      |
| osa-miR1861h   | up   | LOC_Os01g02780 | down | Probable receptor-like protein kinase                    |
| osa-miR1861h   | up   | LOC_Os08g37700 | down | 33 kDa ribonucleoprotein, chloroplastic                  |
| osa-miR1861j   | up   | LOC_Os03g32160 | down | calmodulin binding protein                               |
| osa-miR1861j   | up   | LOC_Os04g43770 | down | Uncharacterized protein                                  |
| osa-miR1861j   | up   | LOC_Os11g13420 | down | RNA binding protein                                      |
| osa-miR1861j   | up   | LOC_Os01g02780 | down | Probable receptor-like protein kinase                    |
| osa-miR1861j   | up   | LOC_Os08g37700 | down | 33 kDa ribonucleoprotein, chloroplastic                  |
| osa-miR1863b.2 | down | LOC_Os01g01660 | up   | Isoflavone reductase homolog IRL                         |
| osa-miR1863b.2 | down | LOC_Os07g46670 | up   | Protein early responsive to dehydration 15               |
| osa-miR1870-5p | up   | LOC_Os03g46200 | down | Uncharacterized N-acetyltransferase p20                  |
| osa-miR1870-5p | up   | LOC_Os10g33210 | down | Peptide transporter PTR3-A                               |

|                 |    |                |      |                                                               |
|-----------------|----|----------------|------|---------------------------------------------------------------|
| osa-miR1870-5p  | up | LOC_Os06g36040 | down | Uncharacterized protein                                       |
| osa-miR1870-5p  | up | LOC_Os01g35330 | down | circumsporozoite protein precursor, putative, expressed       |
| osa-miR1870-5p  | up | LOC_Os08g08130 | down | Glutathione S-transferase T3                                  |
| osa-miR1870-5p  | up | LOC_Os12g07180 | down | Glutathione S-transferase T3                                  |
| osa-miR1870-5p  | up | LOC_Os11g42030 | down | Uncharacterized protein                                       |
| osa-miR1870-5p  | up | LOC_Os02g40190 | down | LRR receptor-like serine/threonine-protein kinase EFR         |
| osa-miR1883a    | up | LOC_Os07g39780 | down | SUMO-activating enzyme subunit 2                              |
| osa-miR1883a    | up | LOC_Os03g40550 | down | Fructokinase-2                                                |
| osa-miR1883a    | up | LOC_Os03g46070 | down | Zeamatin                                                      |
| osa-miR1883a    | up | LOC_Os11g07980 | down | Ankyrin repeat domain-containing protein 6                    |
| osa-miR1883a    | up | LOC_Os10g40030 | down | Short-chain dehydrogenase TIC 32, chloroplastic               |
| osa-miR1883a    | up | LOC_Os03g52640 | down | Uncharacterized protein                                       |
| osa-miR2871a-5p | up | LOC_Os06g11800 | down | Annexin D1                                                    |
| osa-miR2871a-5p | up | LOC_Os07g33480 | down | Cytochrome P450 716B1                                         |
| osa-miR396c-3p  | up | LOC_Os03g46200 | down | Uncharacterized N-acetyltransferase p20                       |
| osa-miR396c-3p  | up | LOC_Os03g11670 | down | Pentatricopeptide repeat-containing protein , chloroplastic   |
| osa-miR396c-3p  | up | LOC_Os01g12400 | down | G-type lectin S-receptor-like serine/threonine-protein kinase |
| osa-miR396c-3p  | up | LOC_Os09g06740 | down | E3 ubiquitin-protein ligase SDIR1                             |
| osa-miR396c-3p  | up | LOC_Os06g11150 | down | Uncharacterized protein                                       |
| osa-miR396c-3p  | up | LOC_Os07g32590 | down | Methionine aminopeptidase 1B, chloroplastic                   |
| osa-miR396c-3p  | up | LOC_Os04g21820 | down | Wall-associated receptor kinase 5                             |
| osa-miR396c-3p  | up | LOC_Os07g30020 | down | Multiple C2 and transmembrane domain-containing protein 1     |
| osa-miR444a-5p  | up | LOC_Os08g41990 | down | Glutamate-1-semialdehyde 2,1-aminomutase, chloroplastic       |
| osa-miR444a-5p  | up | LOC_Os06g50300 | down | Endoplasmin homolog                                           |
| osa-miR444a-5p  | up | LOC_Os06g05450 | down | Uncharacterized protein                                       |
| osa-miR444a-5p  | up | LOC_Os03g40550 | down | Fructokinase-2                                                |
| osa-miR444a-5p  | up | LOC_Os03g27120 | down | Metacaspase-1                                                 |

|                |    |                |      |                                                            |
|----------------|----|----------------|------|------------------------------------------------------------|
| osa-miR444a-5p | up | LOC_Os02g57280 | down | Brown planthopper-induced resistance protein 1             |
| osa-miR444a-5p | up | LOC_Os06g40640 | down | Fructose-bisphosphate aldolase, cytoplasmic isozyme 1      |
| osa-miR444a-5p | up | LOC_Os11g38330 | down | Uncharacterized protein                                    |
| osa-miR444a-5p | up | LOC_Os12g14540 | down | Uncharacterized protein                                    |
| osa-miR444c.2  | up | LOC_Os07g03200 | down | Phytosulfokines 4                                          |
| osa-miR444c.2  | up | LOC_Os01g02400 | down | Probable receptor-like protein kinase At5g39020            |
| osa-miR444c.2  | up | LOC_Os10g42700 | down | CS domain containing protein                               |
| osa-miR444c.2  | up | LOC_Os08g15460 | down | Putative cyclic nucleotide-gated ion channel 15            |
| osa-miR444c.2  | up | LOC_Os04g43770 | down | Uncharacterized protein                                    |
| osa-miR444c.2  | up | LOC_Os01g11160 | down | Cationic amino acid transporter 5                          |
| osa-miR444c.2  | up | LOC_Os07g14740 | down | harpin-induced protein 4 domain containing protein         |
| osa-miR444d.2  | up | LOC_Os07g03200 | down | Phytosulfokines 4                                          |
| osa-miR444d.2  | up | LOC_Os01g02400 | down | Probable receptor-like protein kinase                      |
| osa-miR444d.2  | up | LOC_Os10g42700 | down | CS domain containing protein                               |
| osa-miR444d.2  | up | LOC_Os08g15460 | down | Putative cyclic nucleotide-gated ion channel 15            |
| osa-miR444d.2  | up | LOC_Os06g22440 | down | Jasmonate O-methyltransferase                              |
| osa-miR444d.2  | up | LOC_Os01g11160 | down | Cationic amino acid transporter 5                          |
| osa-miR444d.2  | up | LOC_Os07g14740 | down | harpin-induced protein 3 domain containing protein         |
| osa-miR444d.2  | up | LOC_Os02g40200 | down | Probable LRR receptor-like serine/threonine-protein kinase |
| osa-miR444e    | up | LOC_Os07g03200 | down | Phytosulfokines 4                                          |
| osa-miR444e    | up | LOC_Os01g02400 | down | Probable receptor-like protein kinase                      |
| osa-miR444e    | up | LOC_Os10g42700 | down | CS domain containing protein                               |
| osa-miR444e    | up | LOC_Os08g15460 | down | Putative cyclic nucleotide-gated ion channel 15            |
| osa-miR444e    | up | LOC_Os06g22440 | down | Jasmonate O-methyltransferase                              |
| osa-miR444e    | up | LOC_Os01g11160 | down | Cationic amino acid transporter 5                          |
| osa-miR444e    | up | LOC_Os07g14740 | down | harpin-induced protein 2 domain containing protein         |
| osa-miR444e    | up | LOC_Os02g40200 | down | Probable LRR receptor-like serine/threonine-protein kinase |

|             |    |                |      |                                                            |
|-------------|----|----------------|------|------------------------------------------------------------|
| osa-miR444f | up | LOC_Os07g03200 | down | Phytosulfokines 4                                          |
| osa-miR444f | up | LOC_Os01g02400 | down | Probable receptor-like protein kinase                      |
| osa-miR444f | up | LOC_Os10g42700 | down | CS domain containing protein                               |
| osa-miR444f | up | LOC_Os04g43770 | down | Uncharacterized protein                                    |
| osa-miR444f | up | LOC_Os01g11160 | down | Cationic amino acid transporter 5                          |
| osa-miR444f | up | LOC_Os07g14740 | down | harpin-induced protein 1 domain containing protein         |
| osa-miR444f | up | LOC_Os02g40200 | down | Probable LRR receptor-like serine/threonine-protein kinase |
| osa-miR5072 | up | LOC_Os02g33020 | down | Heme-binding-like protein , chloroplastic                  |
| osa-miR5072 | up | LOC_Os08g26230 | down | Uncharacterized protein                                    |
| osa-miR5072 | up | LOC_Os08g32930 | down | Putative ribonuclease H protein                            |
| osa-miR5072 | up | LOC_Os01g73450 | down | Uridylate kinase                                           |
| osa-miR5072 | up | LOC_Os10g04570 | down | Putative disease resistance protein RGA4                   |
| osa-miR5072 | up | LOC_Os10g27340 | down | Prolyl 4-hydroxylase subunit alpha-1                       |
| osa-miR5072 | up | LOC_Os12g16200 | down | Glutathione synthetase, chloroplastic                      |
| osa-miR5072 | up | LOC_Os01g06876 | down | Receptor-like protein 12                                   |
| osa-miR812a | up | LOC_Os02g38920 | down | Glyceraldehyde-3-phosphate dehydrogenase, cytosolic        |
| osa-miR812a | up | LOC_Os07g48510 | down | Thioredoxin-like 1-1, chloroplastic                        |
| osa-miR812b | up | LOC_Os02g38920 | down | Glyceraldehyde-3-phosphate dehydrogenase, cytosolic        |
| osa-miR812b | up | LOC_Os07g48510 | down | Thioredoxin-like 1-1, chloroplastic                        |
| osa-miR812c | up | LOC_Os02g38920 | down | Glyceraldehyde-3-phosphate dehydrogenase, cytosolic        |
| osa-miR812c | up | LOC_Os07g48510 | down | Thioredoxin-like 1-1, chloroplastic                        |
| osa-miR812d | up | LOC_Os02g38920 | down | Glyceraldehyde-3-phosphate dehydrogenase, cytosolic        |
| osa-miR812d | up | LOC_Os07g48510 | down | Thioredoxin-like 1-1, chloroplastic                        |
| osa-miR812e | up | LOC_Os02g38920 | down | Glyceraldehyde-3-phosphate dehydrogenase, cytosolic        |
| osa-miR812e | up | LOC_Os07g48510 | down | Thioredoxin-like 1-1, chloroplastic                        |
| osa-miR812h | up | LOC_Os06g50300 | down | Endoplasmic reticulum chaperone                            |
| osa-miR812h | up | LOC_Os11g42970 | down | CASP-like protein                                          |

|             |    |                |      |                         |
|-------------|----|----------------|------|-------------------------|
| osa-miR812h | up | LOC_Os02g03370 | down | Uncharacterized protein |
| osa-miR812h | up | LOC_Os08g26230 | down | Uncharacterized protein |
| osa-miR812h | up | LOC_Os05g38880 | down | Uncharacterized protein |
| osa-miR812i | up | LOC_Os06g50300 | down | Endoplasmin homolog     |
| osa-miR812i | up | LOC_Os11g42970 | down | CASP-like protein       |
| osa-miR812i | up | LOC_Os02g03370 | down | Uncharacterized protein |
| osa-miR812i | up | LOC_Os08g26230 | down | Uncharacterized protein |
| osa-miR812i | up | LOC_Os05g38880 | down | Uncharacterized protein |
| osa-miR812j | up | LOC_Os06g50300 | down | Endoplasmin homolog     |
| osa-miR812j | up | LOC_Os11g42970 | down | CASP-like protein       |
| osa-miR812j | up | LOC_Os02g03370 | down | Uncharacterized protein |
| osa-miR812j | up | LOC_Os08g26230 | down | Uncharacterized protein |
| osa-miR812j | up | LOC_Os05g38880 | down | Uncharacterized protein |

---
