# Supplementary material for: Integrative Analysis of the microRNAome and Transcriptome Illuminates the Response of Susceptible Rice Plants to Rice Stripe Virus
Source: PubMed Central journal article supplement (PMC4723043; doi:10.1371/journal.pone.0146946), 2016-01-22
Supplement: pone.0146946.s007.pdf [file pone.0146946.s007.pdf]

**S7 Table.** The relative expression levels of mRNAs evaluated by qPCR assay

| Genes                                                                        | RI        |           | CK        |           | p-value | Fold change (RI/CK) |
|------------------------------------------------------------------------------|-----------|-----------|-----------|-----------|---------|---------------------|
|                                                                              | CT values | Std. Dev. | CT values | Std. Dev. |         |                     |
| LOC_Os09g19280 (RPM1)                                                        | 29.619    | 0.010     | 26.530    | 0.046     | 0.000   | 0.072               |
| LOC_Os02g40190 (EFR)                                                         | 22.516    | 0.069     | 21.014    | 0.327     | 0.002   | 0.230               |
| LOC_Os08g34740 (SGT1)                                                        | 23.902    | 0.076     | 22.638    | 0.563     | 0.025   | 0.271               |
| LOC_Os02g33180 (RAR1)                                                        | 24.142    | 0.035     | 22.625    | 0.237     | 0.001   | 0.227               |
| LOC_Os03g18850 (PR1 )                                                        | 30.289    | 0.237     | 26.541    | 0.237     | 0.000   | 0.048               |
| LOC_Os06g48590 (MPK4)                                                        | 28.364    | 0.124     | 27.598    | 0.524     | 0.000   | 0.382               |
| LOC_Os03g55164 (WRKY33)                                                      | 28.132    | 0.255     | 26.887    | 0.356     | 0.005   | 0.274               |
| LOC_Os03g49640 (MEKK1)                                                       | 22.630    | 0.563     | 21.007    | 0.537     | 0.000   | 0.211               |
| LOC_Os06g05520 (MEK1)                                                        | 28.549    | 0.236     | 27.222    | 0.369     | 0.000   | 0.259               |
| LOC_Os09g29840 (HSP90)                                                       | 28.376    | 0.512     | 27.593    | 0.026     | 0.001   | 0.378               |
| LOC_Os11g40970 (Probable LRR receptor-like serine/threonine-protein kinase   | 28.770    | 0.357     | 26.518    | 0.365     | 0.003   | 0.137               |
| LOC_Os02g40200 (Probable LRR receptor-like serine/threonine-protein kinase ) | 30.263    | 0.079     | 26.581    | 0.537     | 0.000   | 0.051               |
| LOC_Os01g71340 (Glucan endo-1,3-beta-glucosidase)                            | 24.098    | 0.448     | 22.675    | 0.057     | 0.003   | 0.229               |
| LOC_Os07g35680 (Cysteine-rich receptor-like protein kinase 8 )               | 28.454    | 0.068     | 27.220    | 0.037     | 0.001   | 0.261               |
| LOC_Os02g57280 (Brown planthopper-induced resistance protein 6)              | 22.545    | 0.359     | 20.959    | 0.279     | 0.002   | 0.205               |
| LOC_Os01g53020 (heat shock protein DnaJ)                                     | 29.770    | 0.466     | 26.518    | 0.369     | 0.002   | 0.064               |
| LOC_Os04g21820 (Wall-associated receptor kinase 5 )                          | 28.590    | 0.165     | 27.531    | 0.560     | 0.009   | 0.295               |
| LOC_Os10g04570 (Putative disease resistance protein RGA4)                    | 23.194    | 0.560     | 21.538    | 0.579     | 0.005   | 0.195               |
