# Supplementary material for: Integrative Analysis of the microRNAome and Transcriptome Illuminates the Response of Susceptible Rice Plants to Rice Stripe Virus
Source: PubMed Central journal article supplement (PMC4723043; doi:10.1371/journal.pone.0146946), 2016-01-22
Supplement: pone.0146946.s008.pdf [file pone.0146946.s008.pdf]

**S8 Table.** The different expression levels of AP2/DREBP/EREBP/NAC-like transcript factors after RSV infection (Fold change $\geq$ 2 and P<0.05)

| Gene ID        | Average FPKM values  |                     | p-value | Fold change<br>(RI/CK) | Gene description                                      |
|----------------|----------------------|---------------------|---------|------------------------|-------------------------------------------------------|
|                | RI                   | CK                  |         |                        |                                                       |
| LOC_Os01g49830 | 6.585 $\pm$ 0.455    | 16.588 $\pm$ 1.448  | 0.0062  | 0.397                  | AP2/ERF and B3 domain-containing protein Os01g0693400 |
| LOC_Os05g47650 | 4.351 $\pm$ 0.065    | 19.795 $\pm$ 2.507  | 0.0129  | 0.22                   | AP2/ERF and B3 domain-containing protein Os05g0549800 |
| LOC_Os09g35030 | 29.807 $\pm$ 2.122   | 0.718 $\pm$ 0.399   | 0.002   | 41.507                 | Dehydration-responsive element-binding protein 1A     |
| LOC_Os09g35010 | 109.578 $\pm$ 11.576 | 2.746 $\pm$ 1.162   | 0.0054  | 39.911                 | Dehydration-responsive element-binding protein 1B     |
| LOC_Os04g48350 | 19.079 $\pm$ 2.598   | 0.750 $\pm$ 0.151   | 0.0097  | 25.434                 | Dehydration-responsive element-binding protein 1E     |
| LOC_Os09g35020 | 10.362 $\pm$ 1.623   | 0.867 $\pm$ 1.125   | 0.0037  | 11.95                  | Dehydration-responsive element-binding protein 1H     |
| LOC_Os09g28440 | 27.766 $\pm$ 3.790   | 0.427 $\pm$ 0.167   | 0.0094  | 64.963                 | Ethylene-responsive transcription factor ERF109       |
| LOC_Os04g52090 | 101.857 $\pm$ 9.393  | 11.384 $\pm$ 3.227  | 0.0025  | 8.948                  | Ethylene-responsive transcription factor 4            |
| LOC_Os05g41780 | 375.156 $\pm$ 39.887 | 59.612 $\pm$ 4.436  | 0.0073  | 6.293                  | Ethylene-responsive transcription factor 4            |
| LOC_Os04g46440 | 13.942 $\pm$ 1.851   | 3.479 $\pm$ 0.893   | 0.0063  | 4.007                  | Ethylene-responsive transcription factor ERF038       |
| LOC_Os01g58420 | 31.267 $\pm$ 3.130   | 8.477 $\pm$ 2.614   | 0.0016  | 3.688                  | Ethylene-responsive transcription factor 4            |
| LOC_Os03g08500 | 170.069 $\pm$ 8.295  | 64.924 $\pm$ 13.471 | 0.0017  | 2.62                   | Ethylene-responsive transcription factor ERF073       |
| LOC_Os09g11480 | 16.177 $\pm$ 1.032   | 51.889 $\pm$ 6.019  | 0.012   | 0.312                  | Ethylene-responsive transcription factor ERF110       |
| LOC_Os05g03040 | 37.235 $\pm$ 7.101   | 95.716 $\pm$ 5.033  | 0.0011  | 0.389                  | Ethylene-responsive transcription factor RAP2-7       |
| LOC_Os11g05614 | 10.215 $\pm$ 0.704   | 2.097 $\pm$ 0.657   | 0.0003  | 4.872                  | NAC domain-containing protein 90                      |
| LOC_Os01g48446 | 17.712 $\pm$ 1.693   | 4.216 $\pm$ 0.573   | 0.0041  | 4.201                  | NAC domain-containing protein 68                      |
| LOC_Os03g60080 | 293.077 $\pm$ 43.510 | 88.794 $\pm$ 5.751  | 0.0204  | 3.301                  | NAC domain-containing protein 67                      |
| LOC_Os05g34830 | 15.105 $\pm$ 0.647   | 5.993 $\pm$ 1.367   | 0.0041  | 2.52                   | NAC domain-containing protein 48                      |
| LOC_Os07g12340 | 43.132 $\pm$ 0.605   | 21.039 $\pm$ 1.617  | 0.0009  | 2.05                   | NAC domain-containing protein 67                      |
| LOC_Os10g21560 | 5.732 $\pm$ 0.390    | 11.675 $\pm$ 1.101  | 0.01    | 0.491                  | NAC domain-containing protein 78                      |
| LOC_Os12g29330 | 20.463 $\pm$ 1.491   | 46.874 $\pm$ 4.155  | 0.0066  | 0.437                  | NAC domain-containing protein 29                      |
| LOC_Os09g33490 | 4.615 $\pm$ 0.257    | 10.613 $\pm$ 1.220  | 0.0167  | 0.435                  | NAC domain-containing protein 18                      |
| LOC_Os06g51070 | 31.221 $\pm$ 5.318   | 83.764 $\pm$ 7.554  | 0.002   | 0.373                  | Putative NAC domain-containing protein 94             |
| LOC_Os01g70110 | 5.157 $\pm$ 0.631    | 14.946 $\pm$ 0.516  | 0.0001  | 0.345                  | NAC domain-containing protein 18                      |
